# Supplementary material for: Analysing linear multivariate pattern transformations in neuroimaging data
Source: PubMed Central journal article supplement (PMC6793861; doi:10.1371/journal.pone.0223660), 2019-10-15

## 1. Masks used for region-of-interest definition

manually defined cortex mask

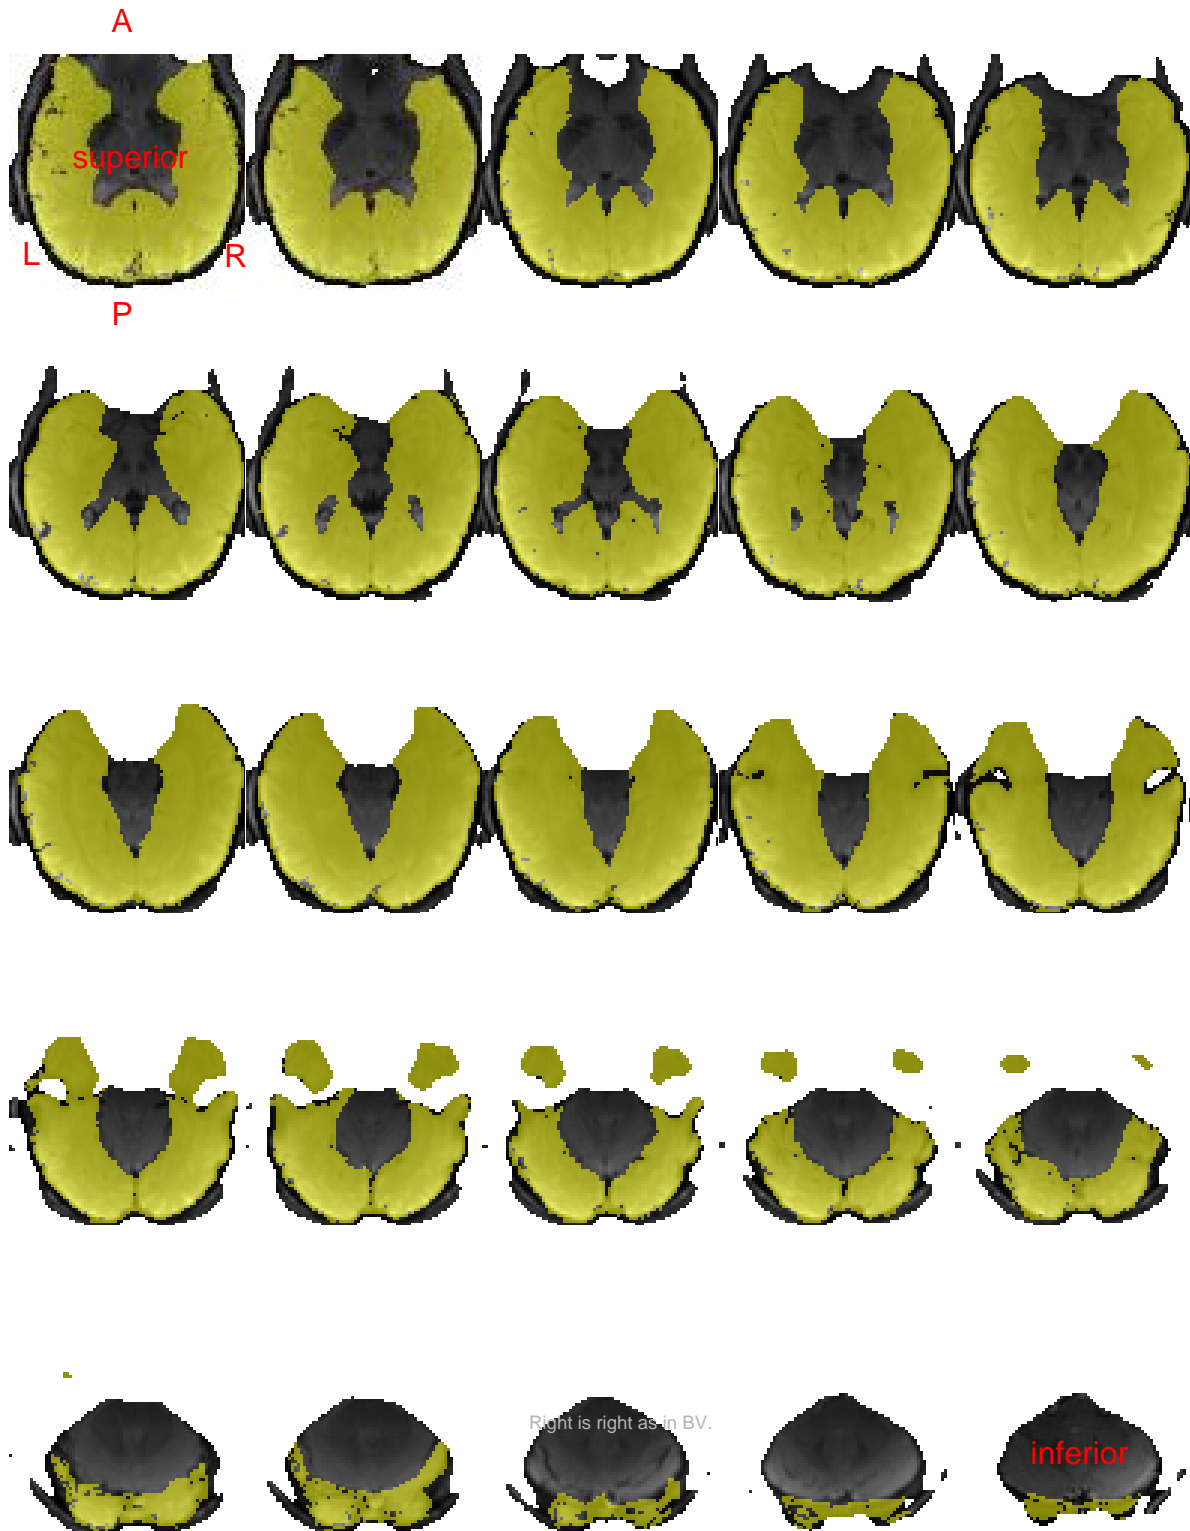

subject 1  
session 1

global segmentation: aIT (red), pIT (green), EVA (blue), subcortical (white)

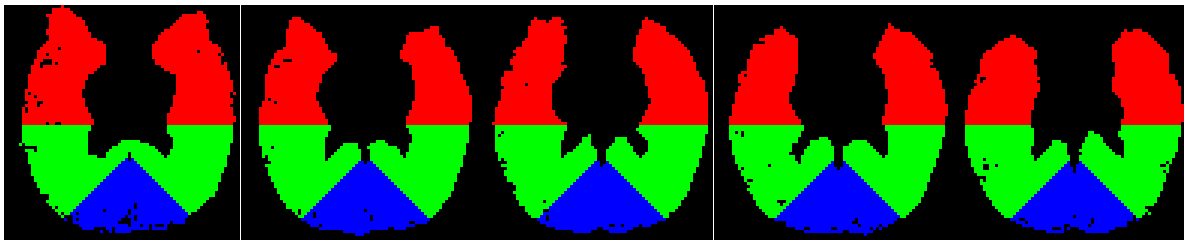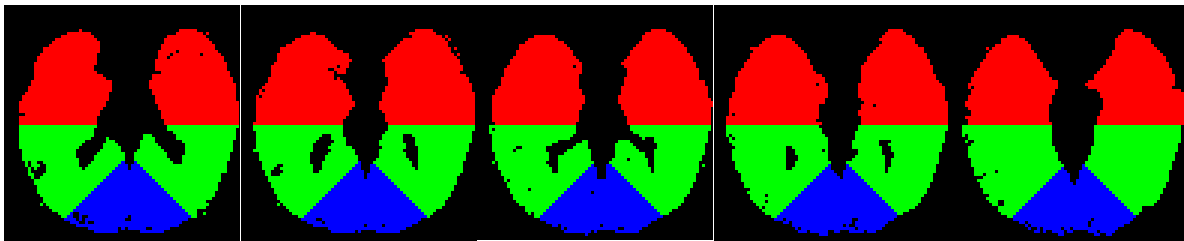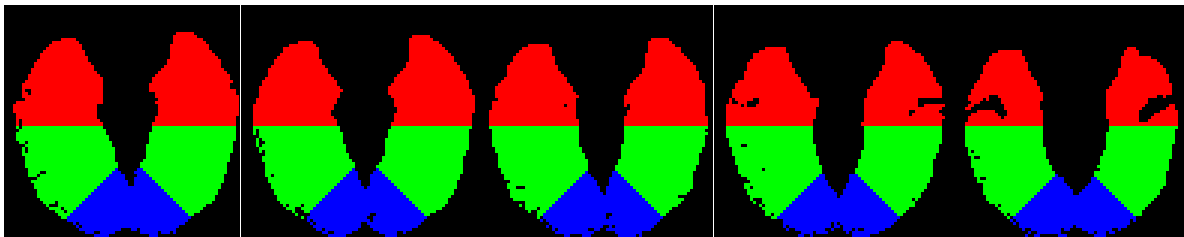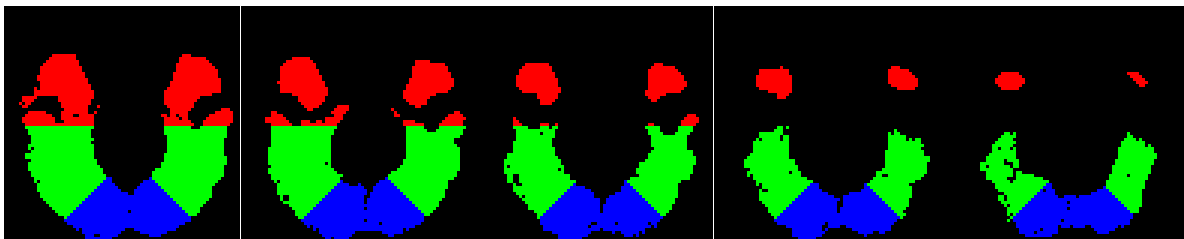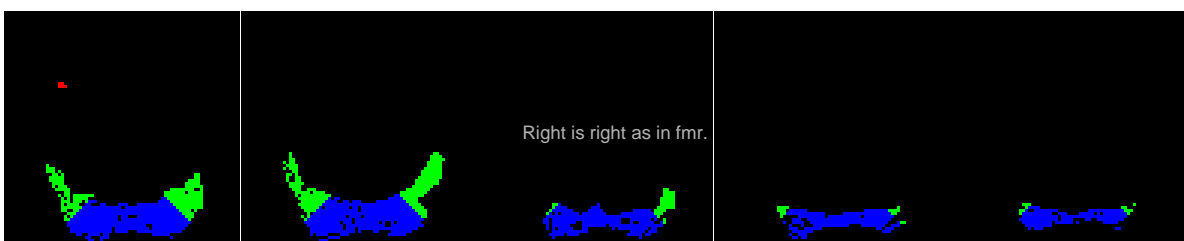

manually defined cortex mask

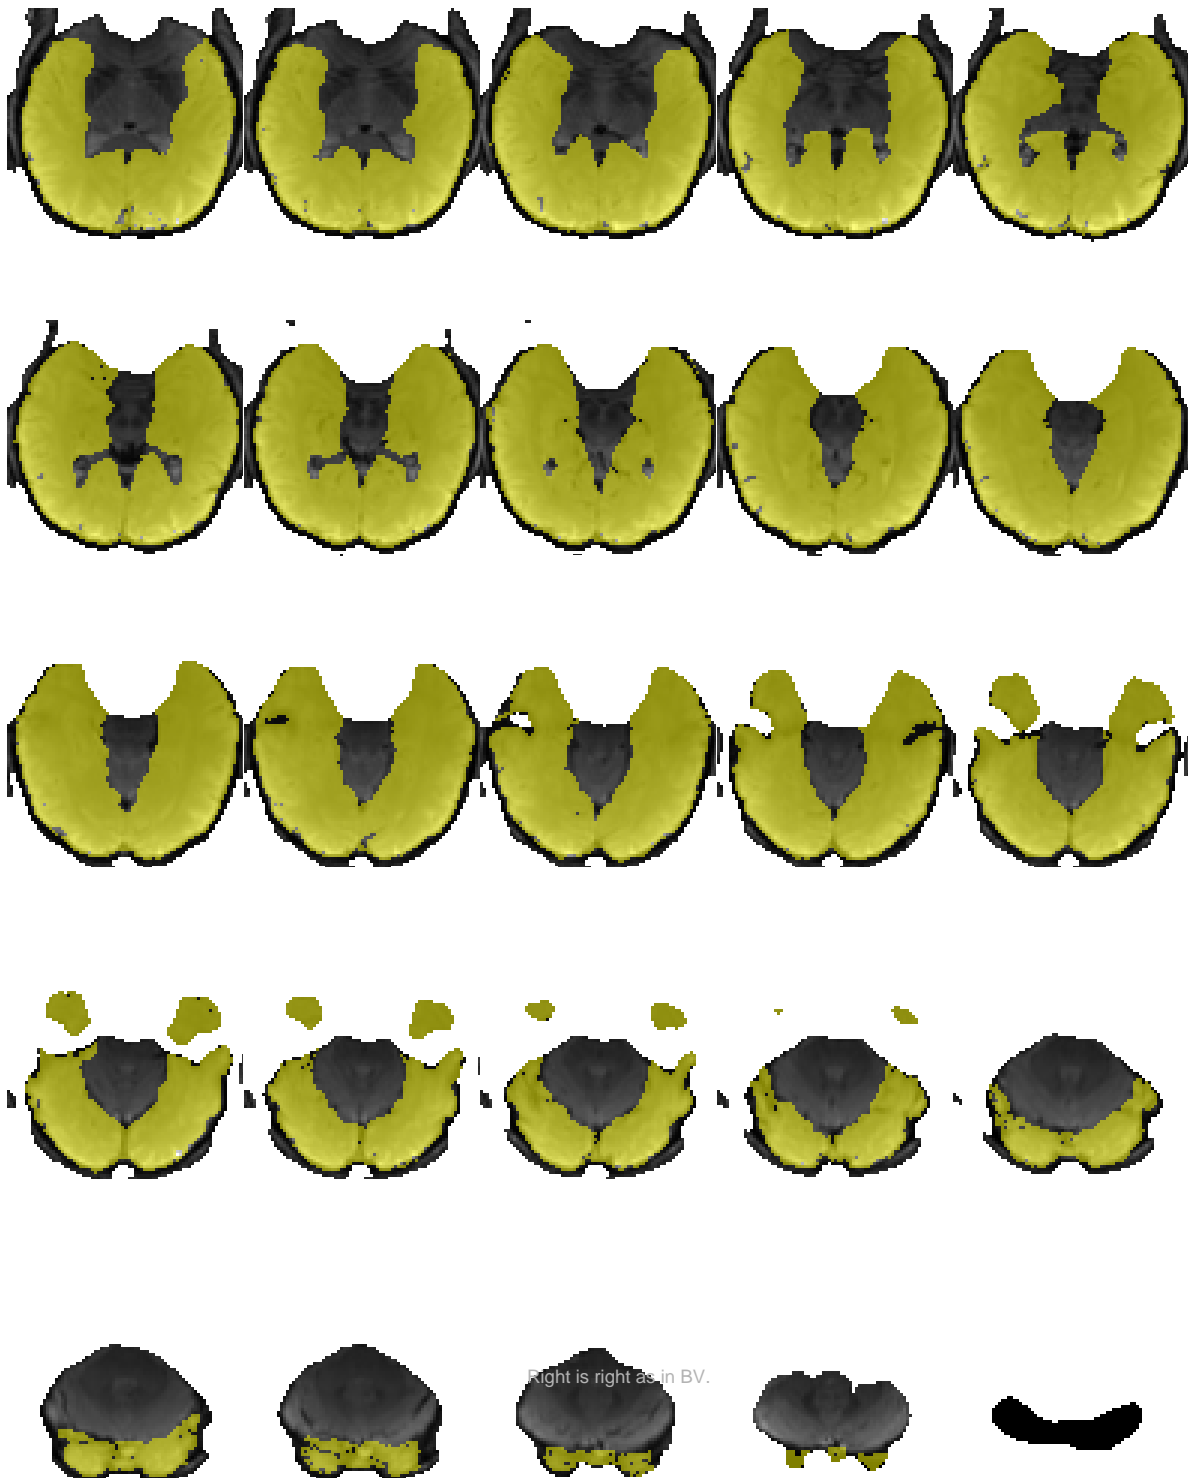

subject 1  
session 2

global segmentation: aIT (red), pIT (green), EVA (blue), subcortical (white)

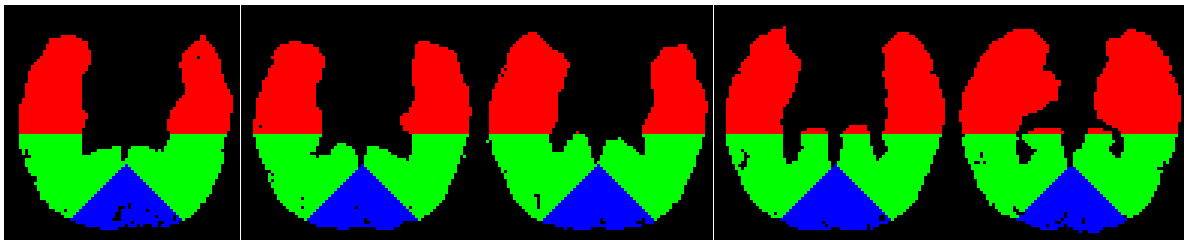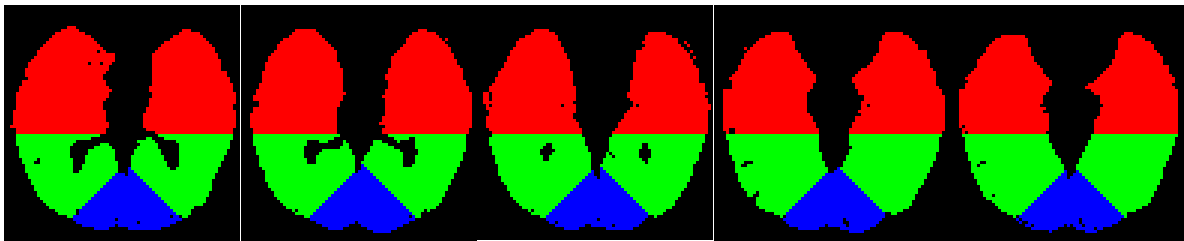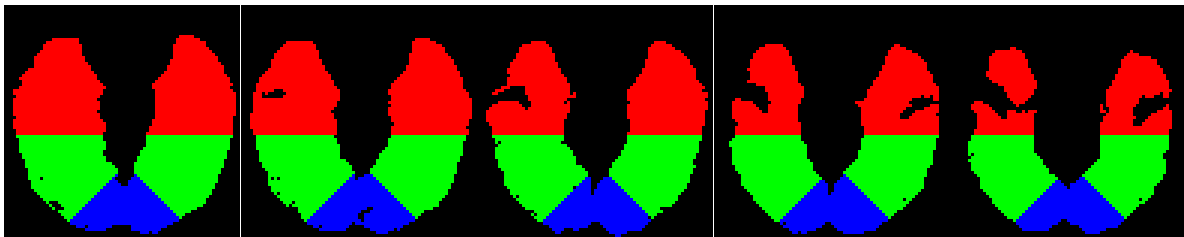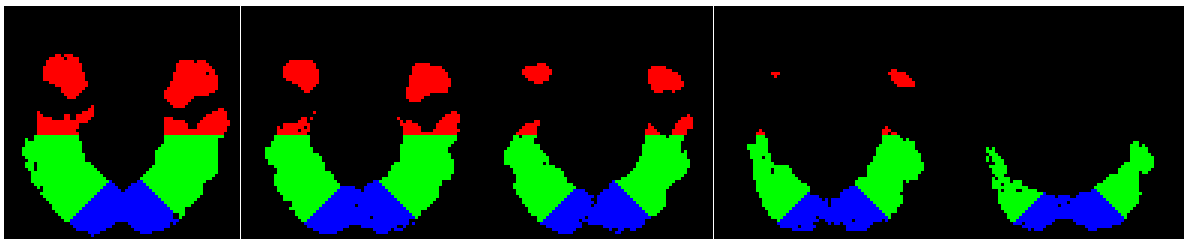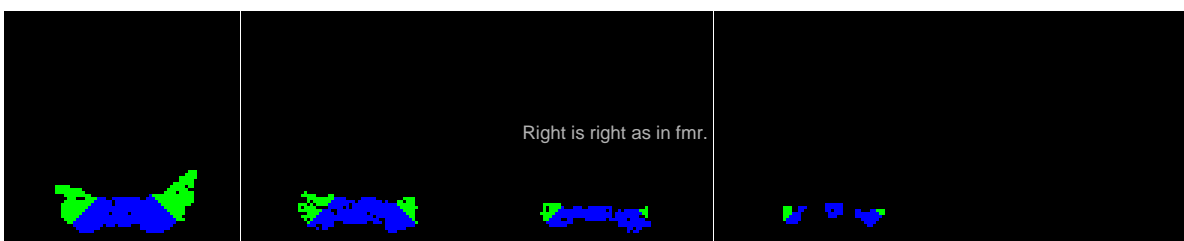

manually defined cortex mask

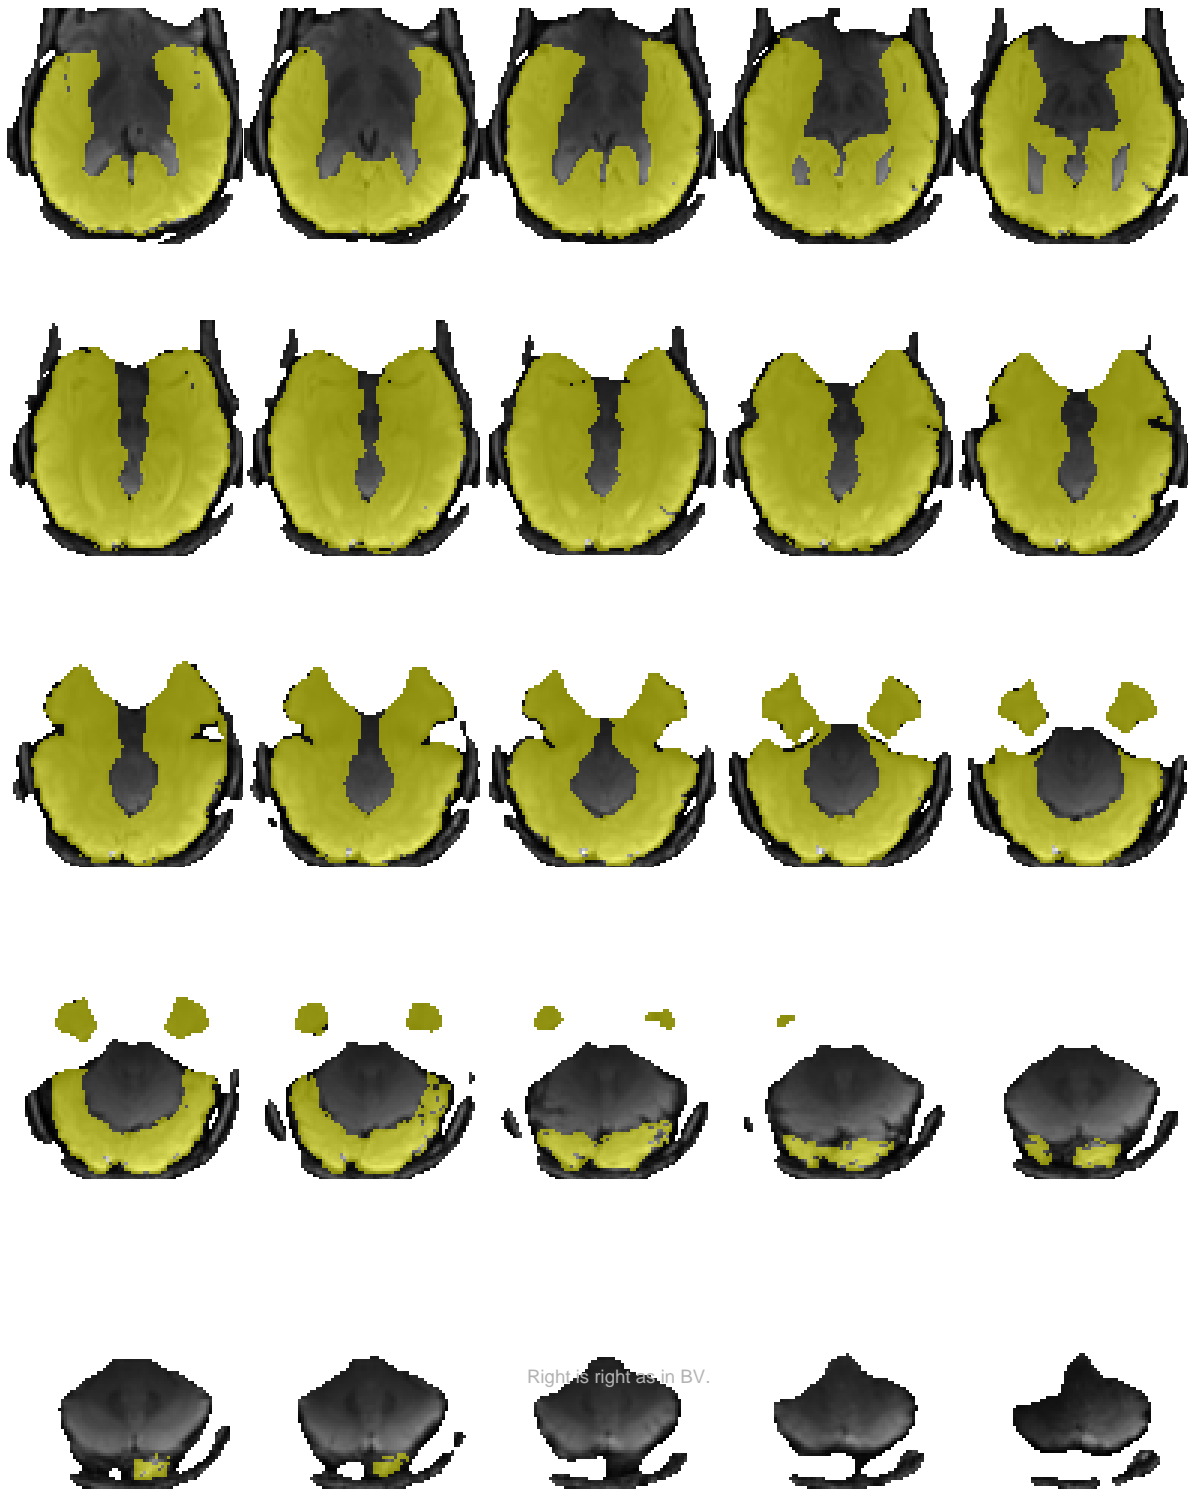

subject 2  
session 1

global segmentation: aIT (red), pIT (green), EVA (blue), subcortical (white)

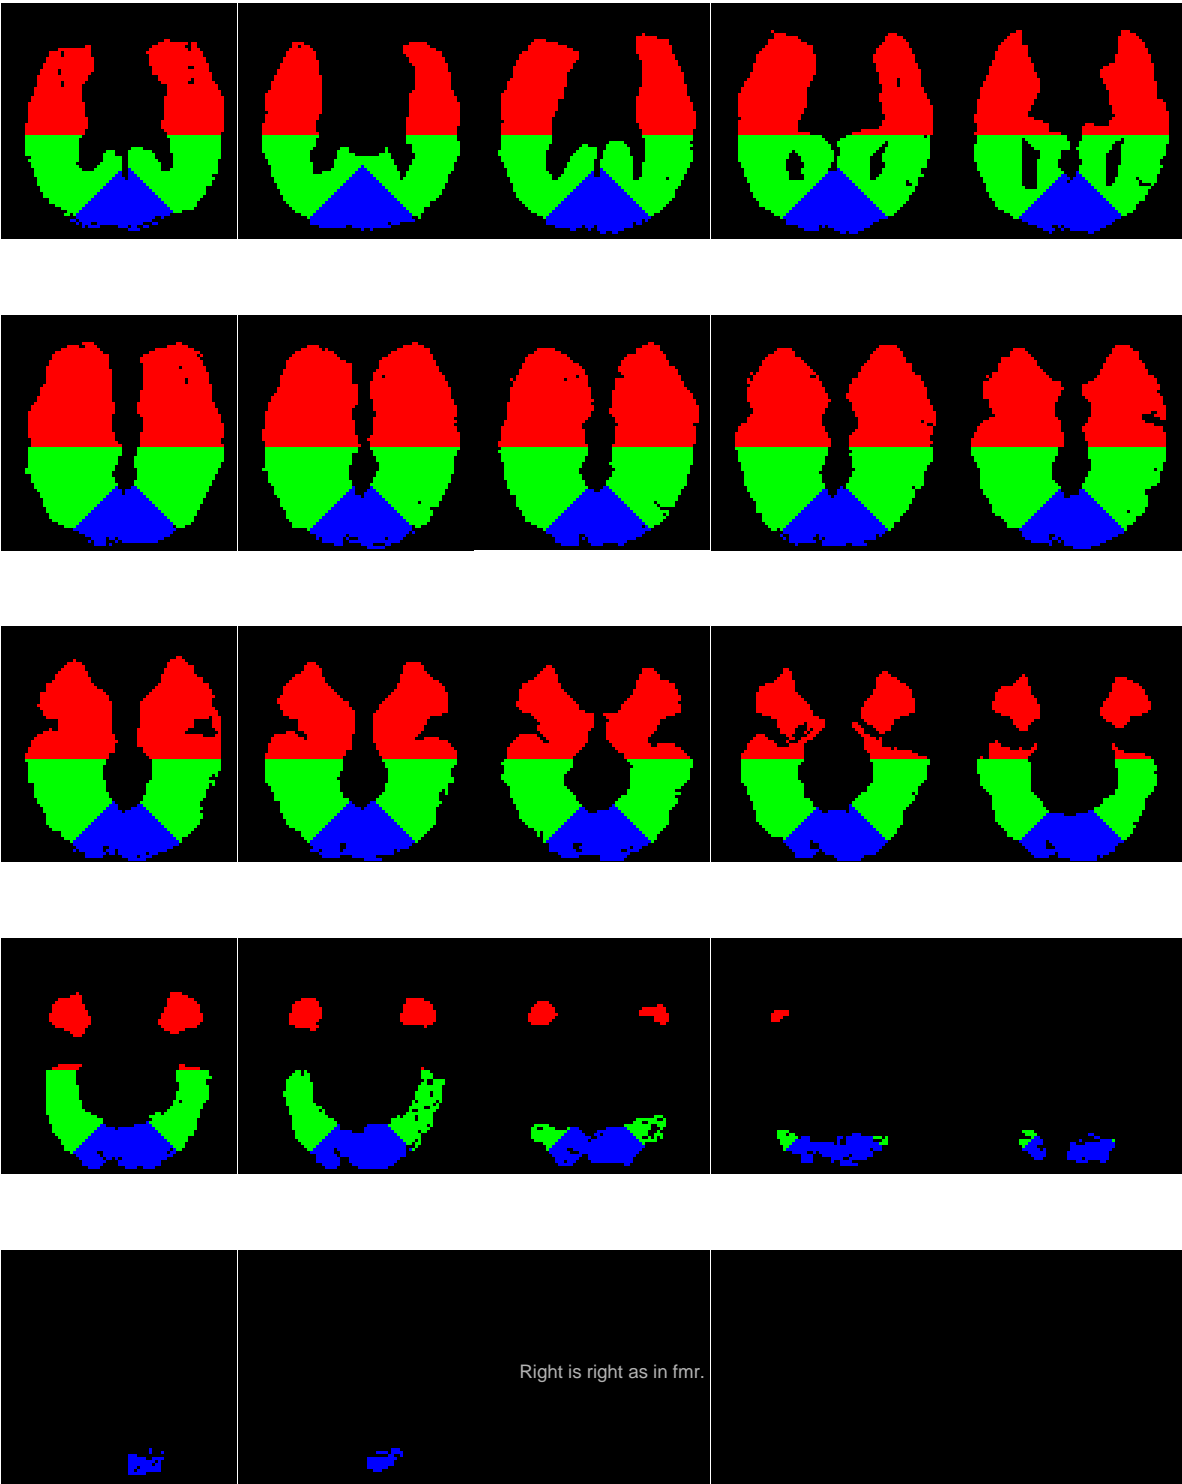

manually defined cortex mask

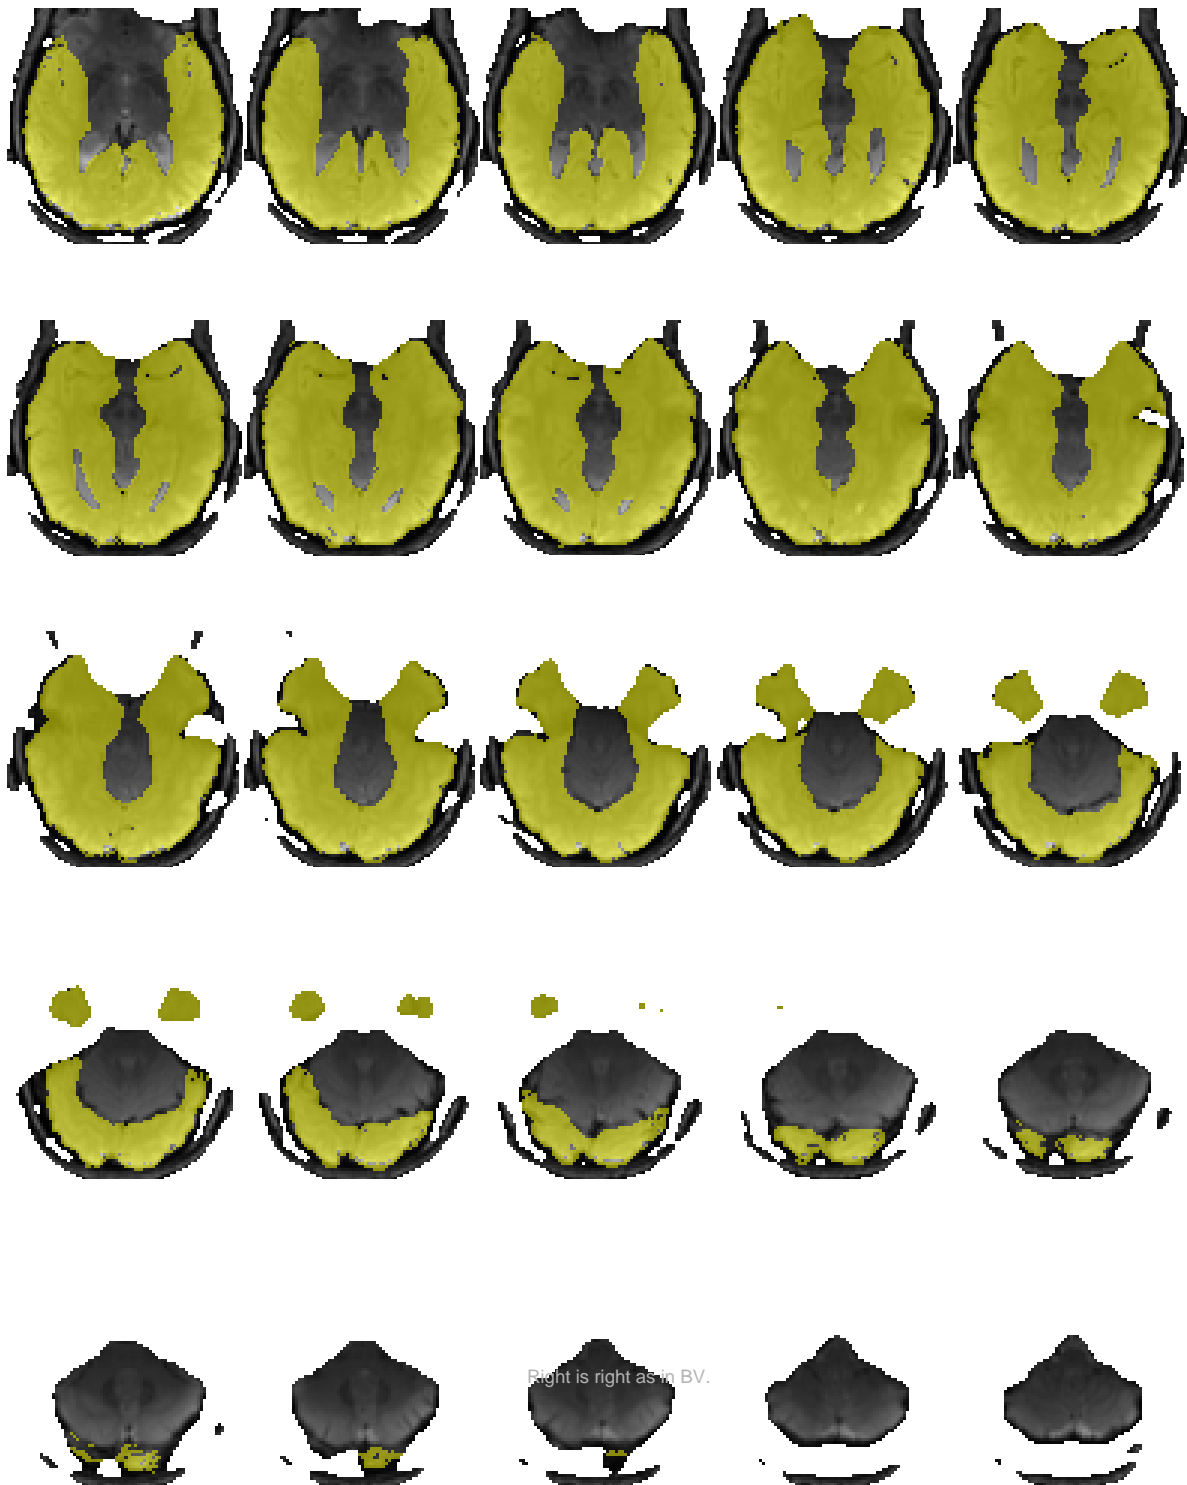



subject 2  
session 3

global segmentation: aIT (red), pIT (green), EVA (blue), subcortical (white)

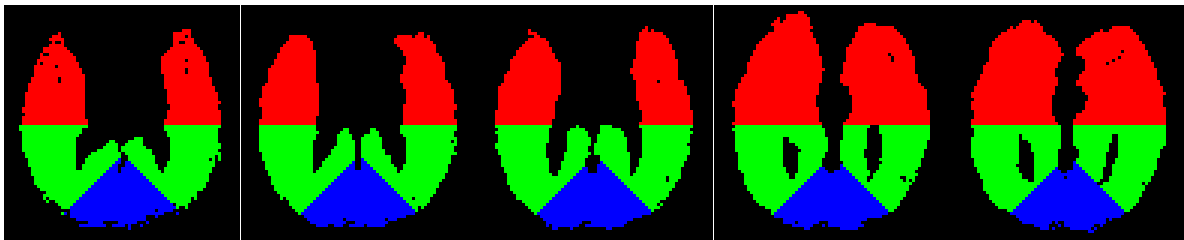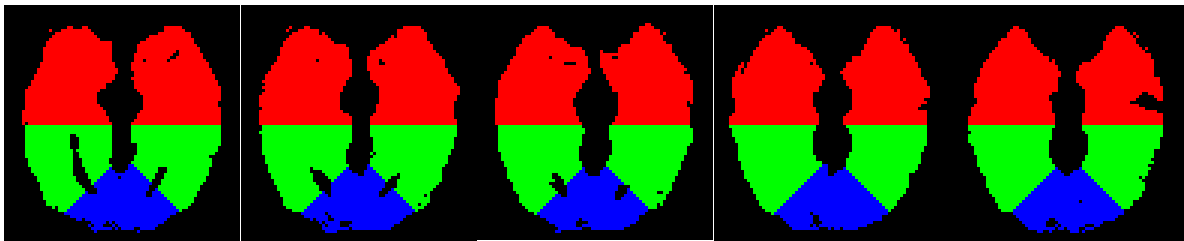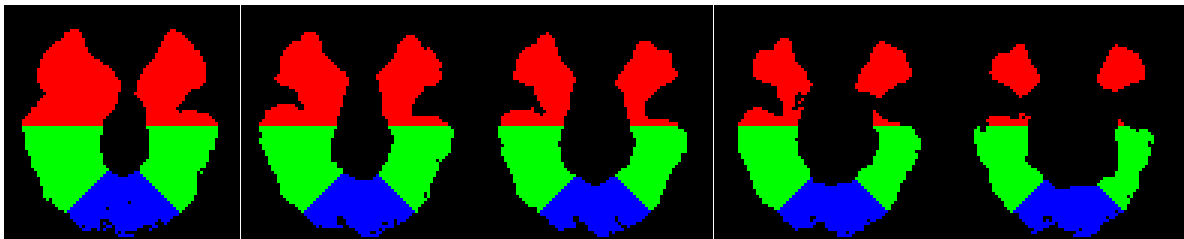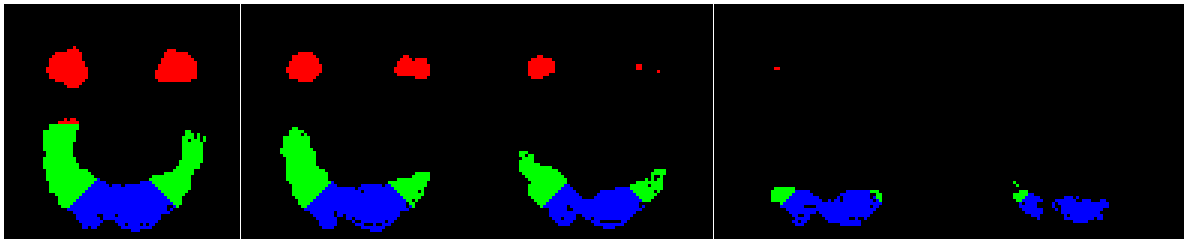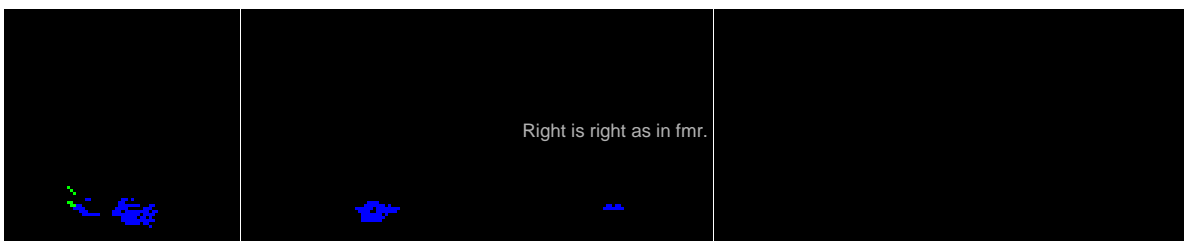

manually defined cortex mask

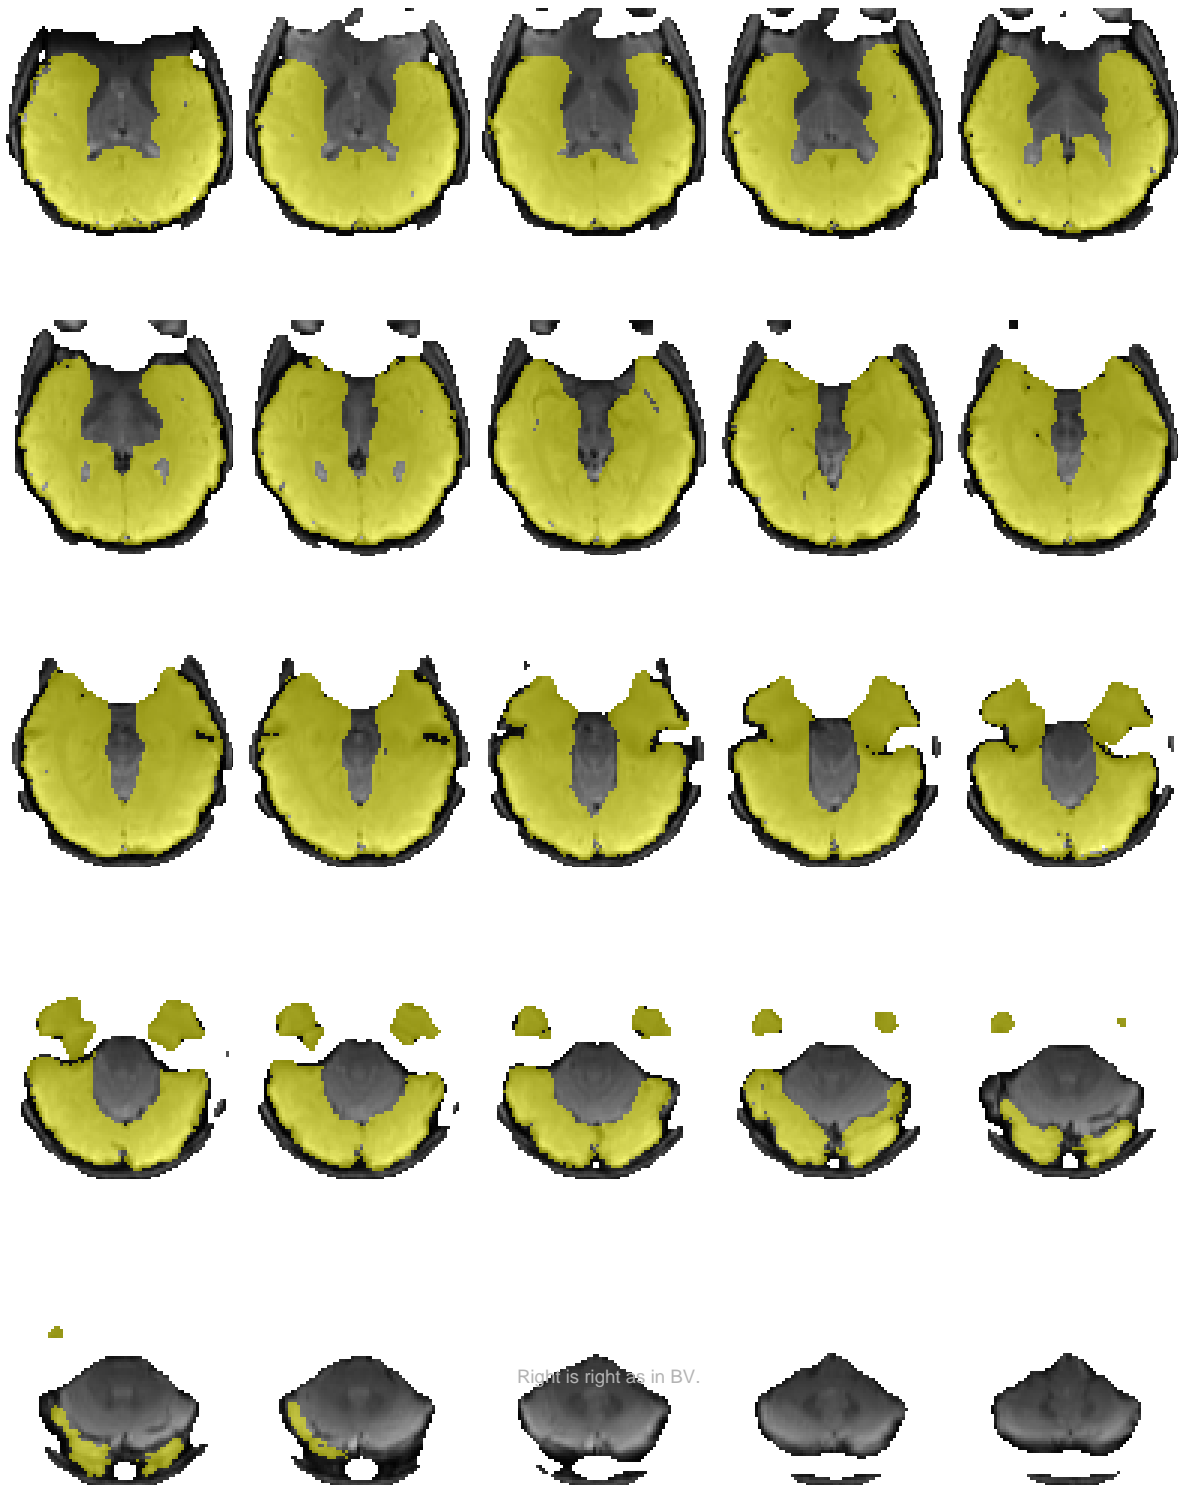

subject 3  
session 1

global segmentation: aIT (red), pIT (green), EVA (blue), subcortical (white)

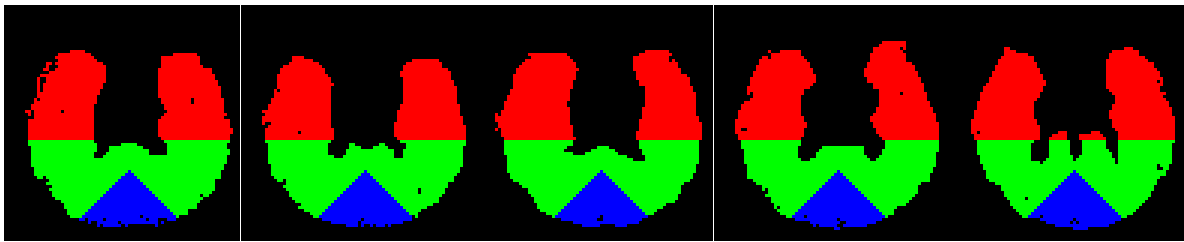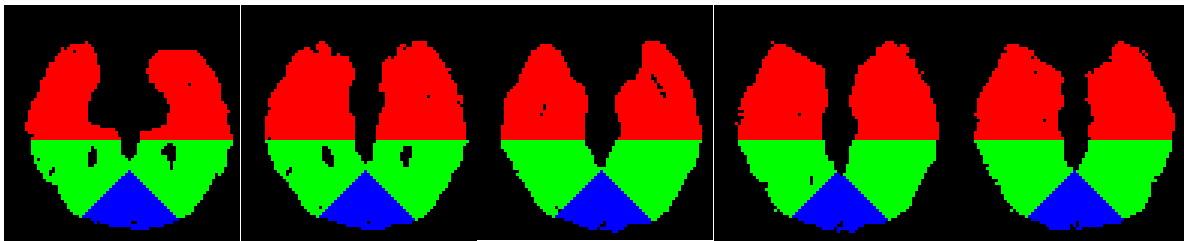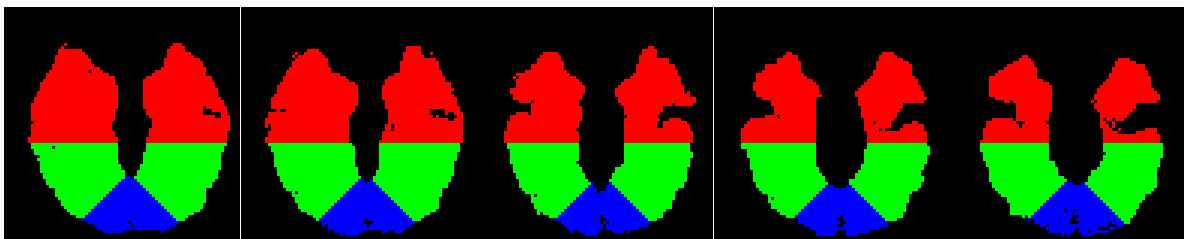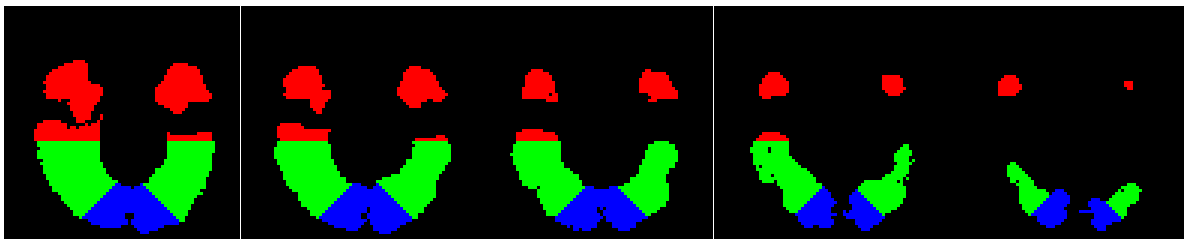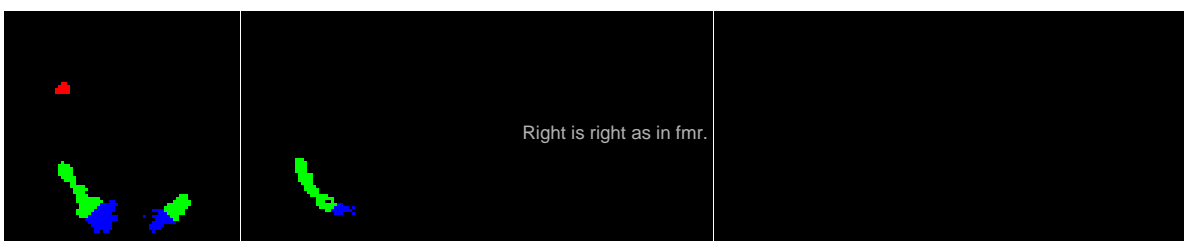

manually defined cortex mask

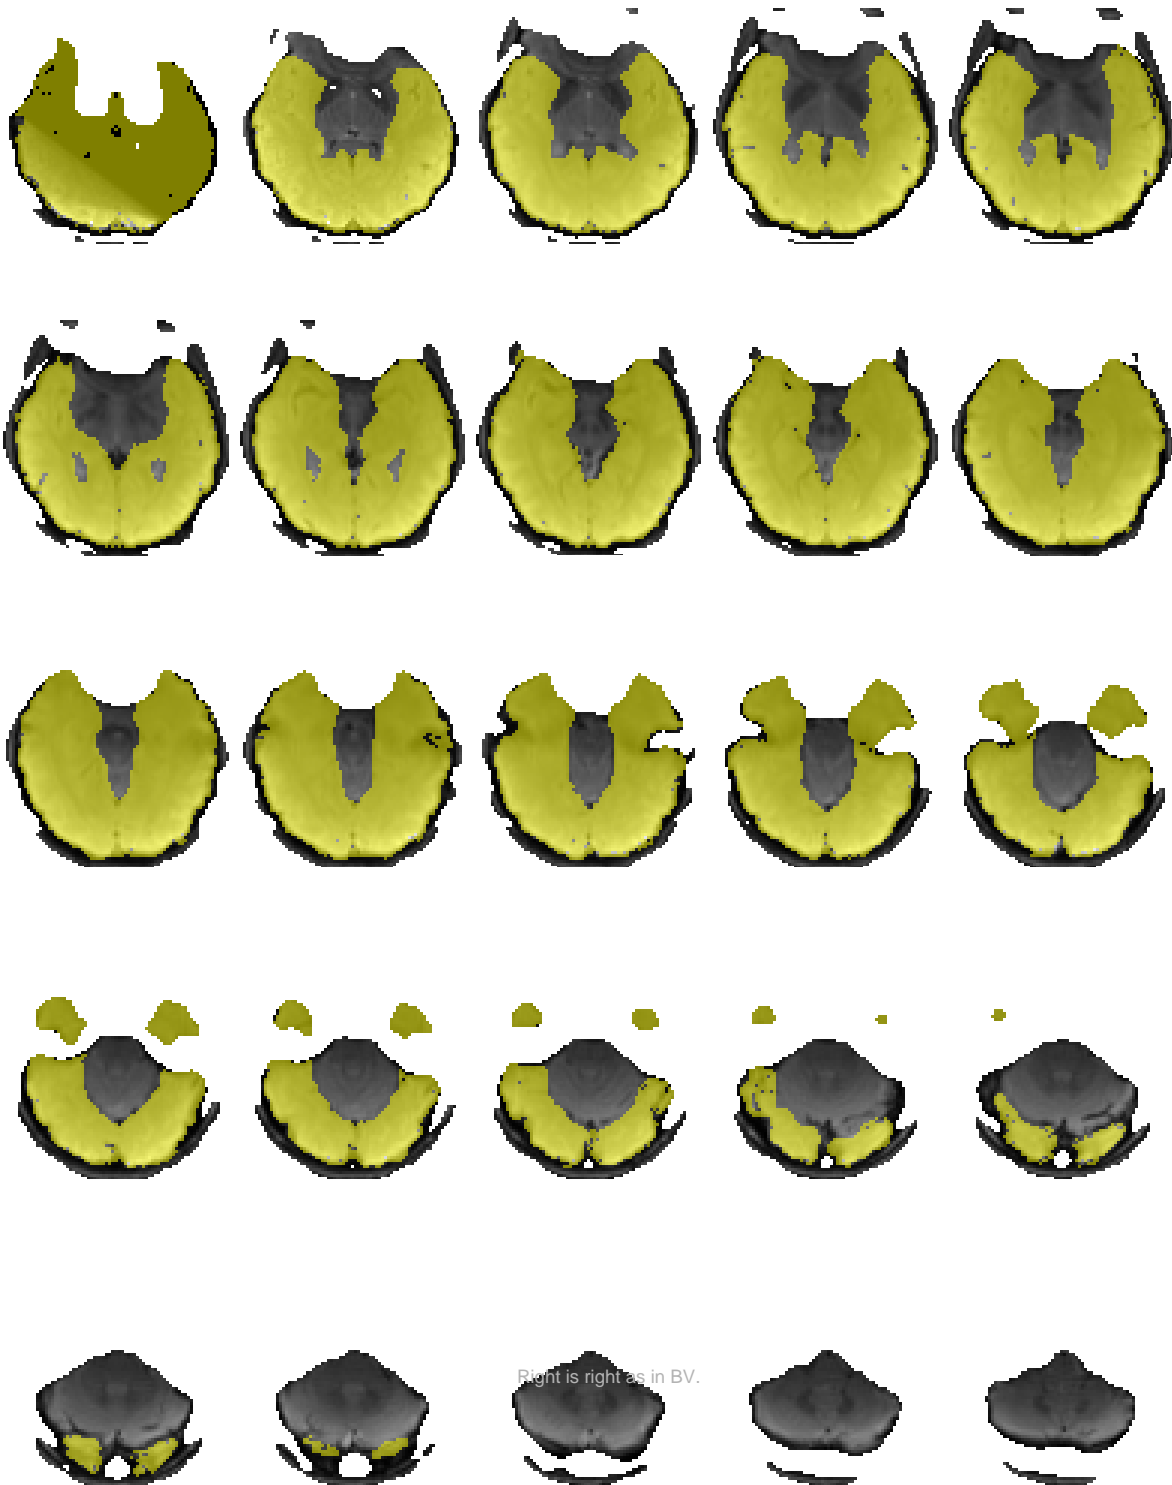

subject 3  
session 2

global segmentation: aIT (red), pIT (green), EVA (blue), subcortical (white)

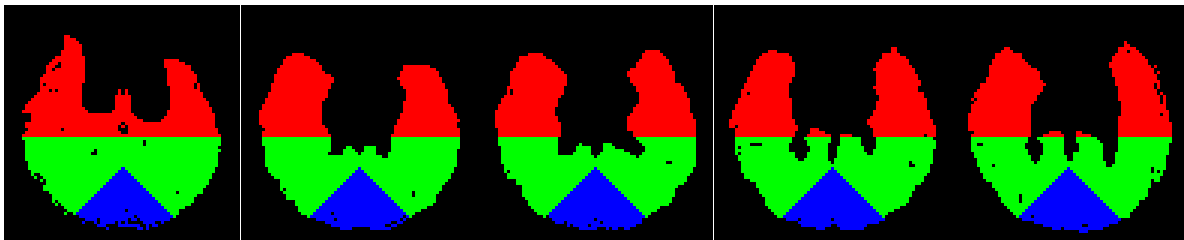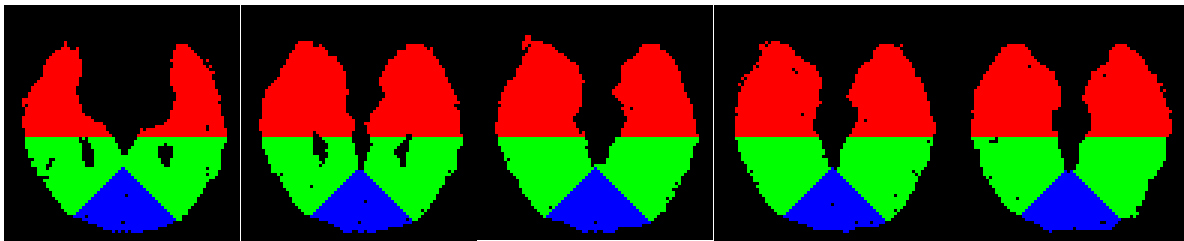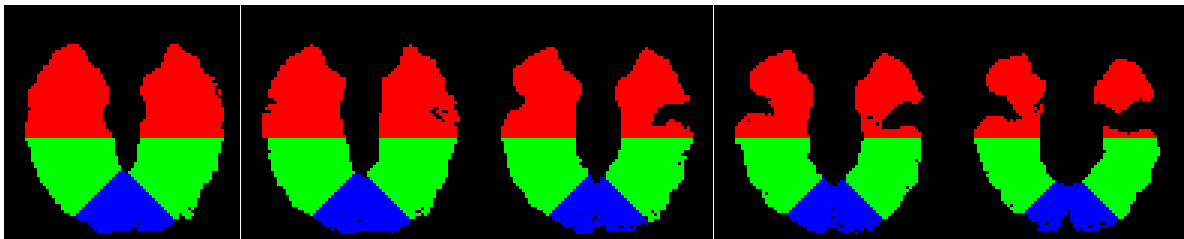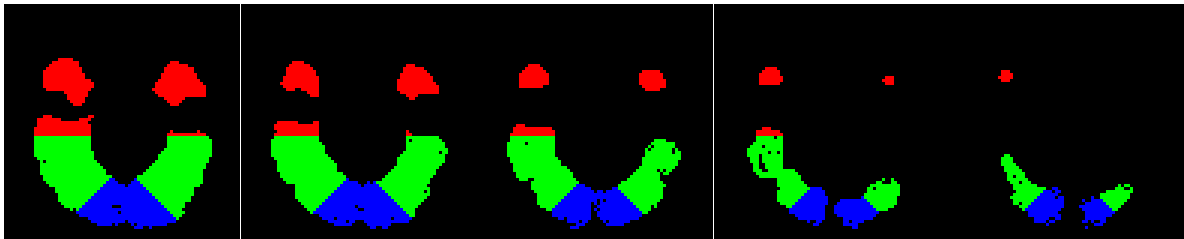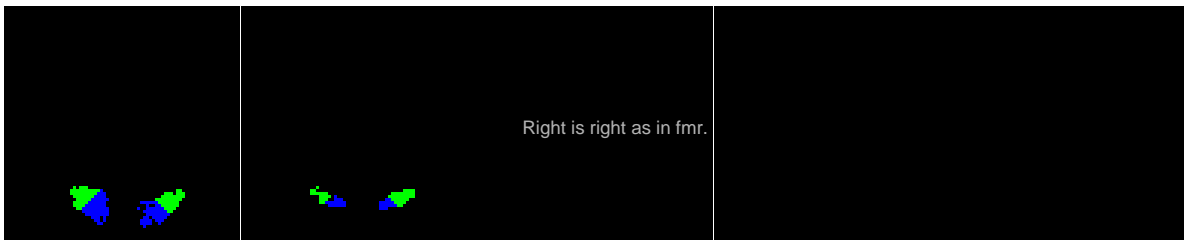

manually defined cortex mask

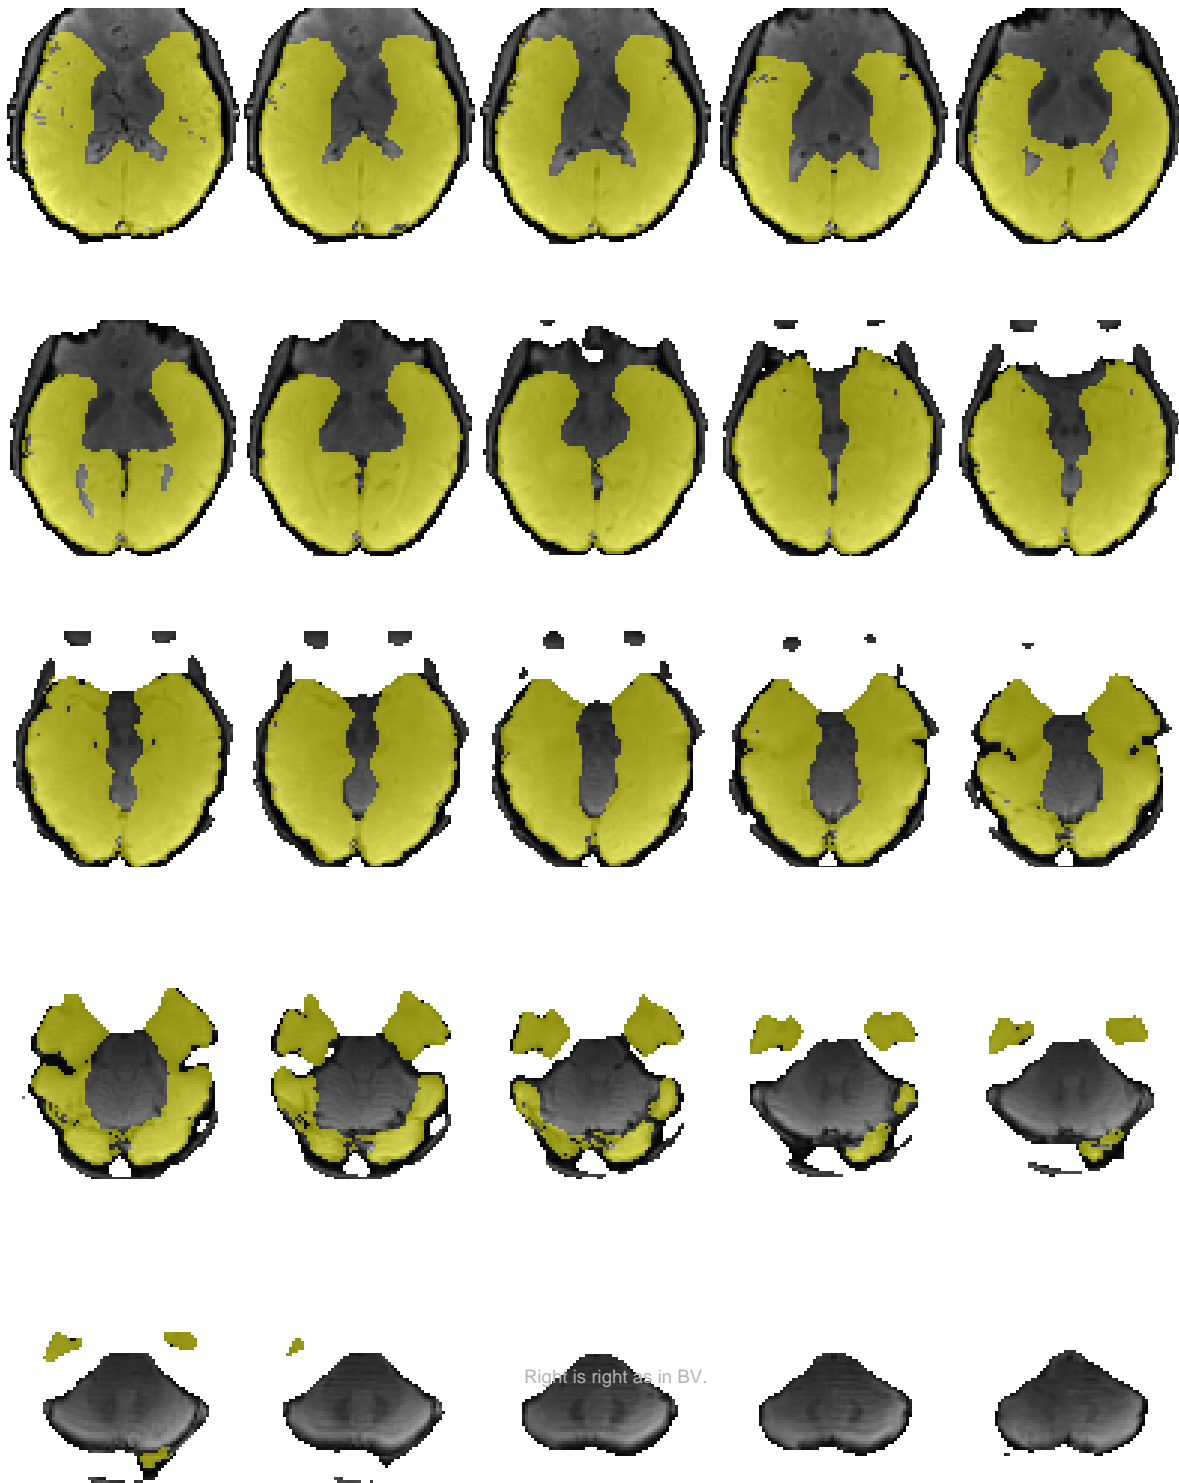

subject 4  
session 1

global segmentation: aIT (red), pIT (green), EVA (blue), subcortical (white)

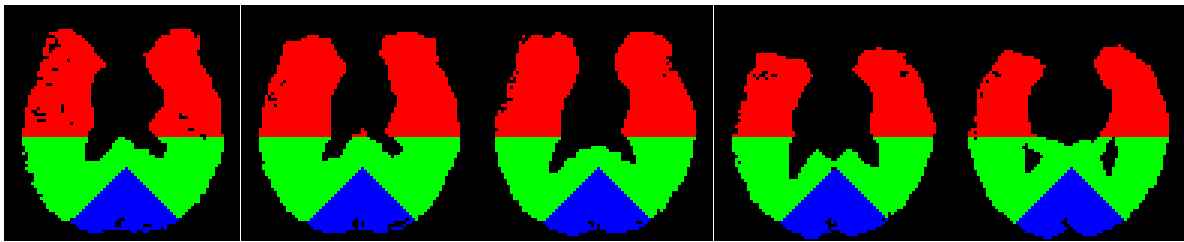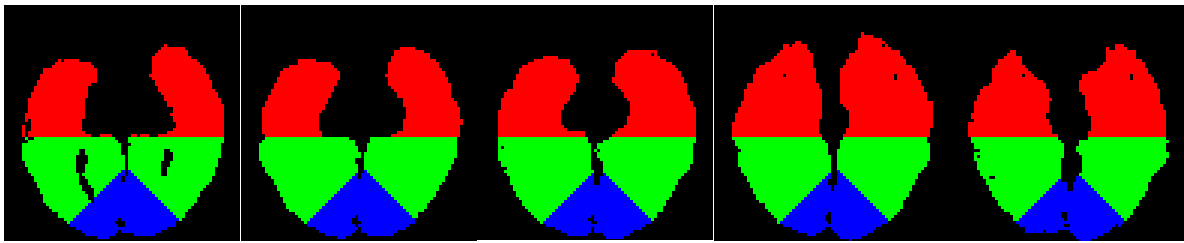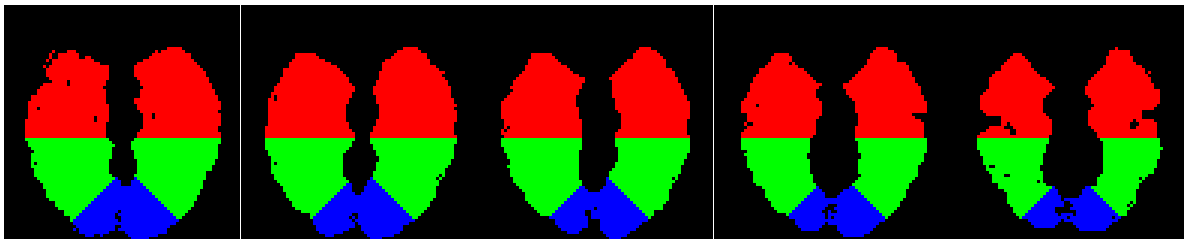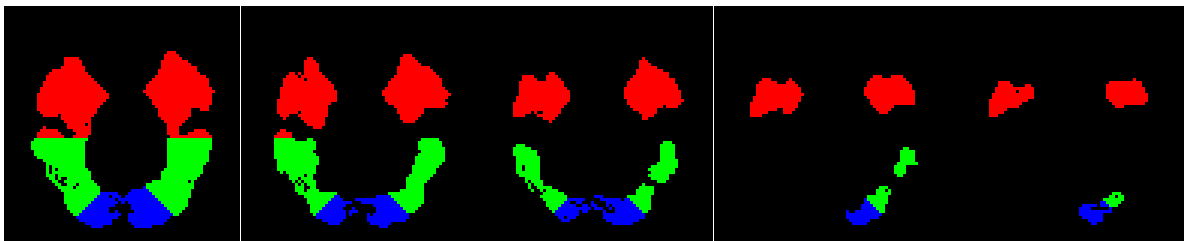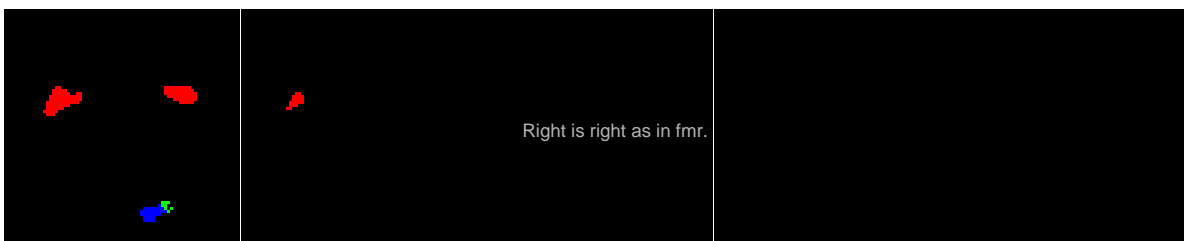

manually defined cortex mask

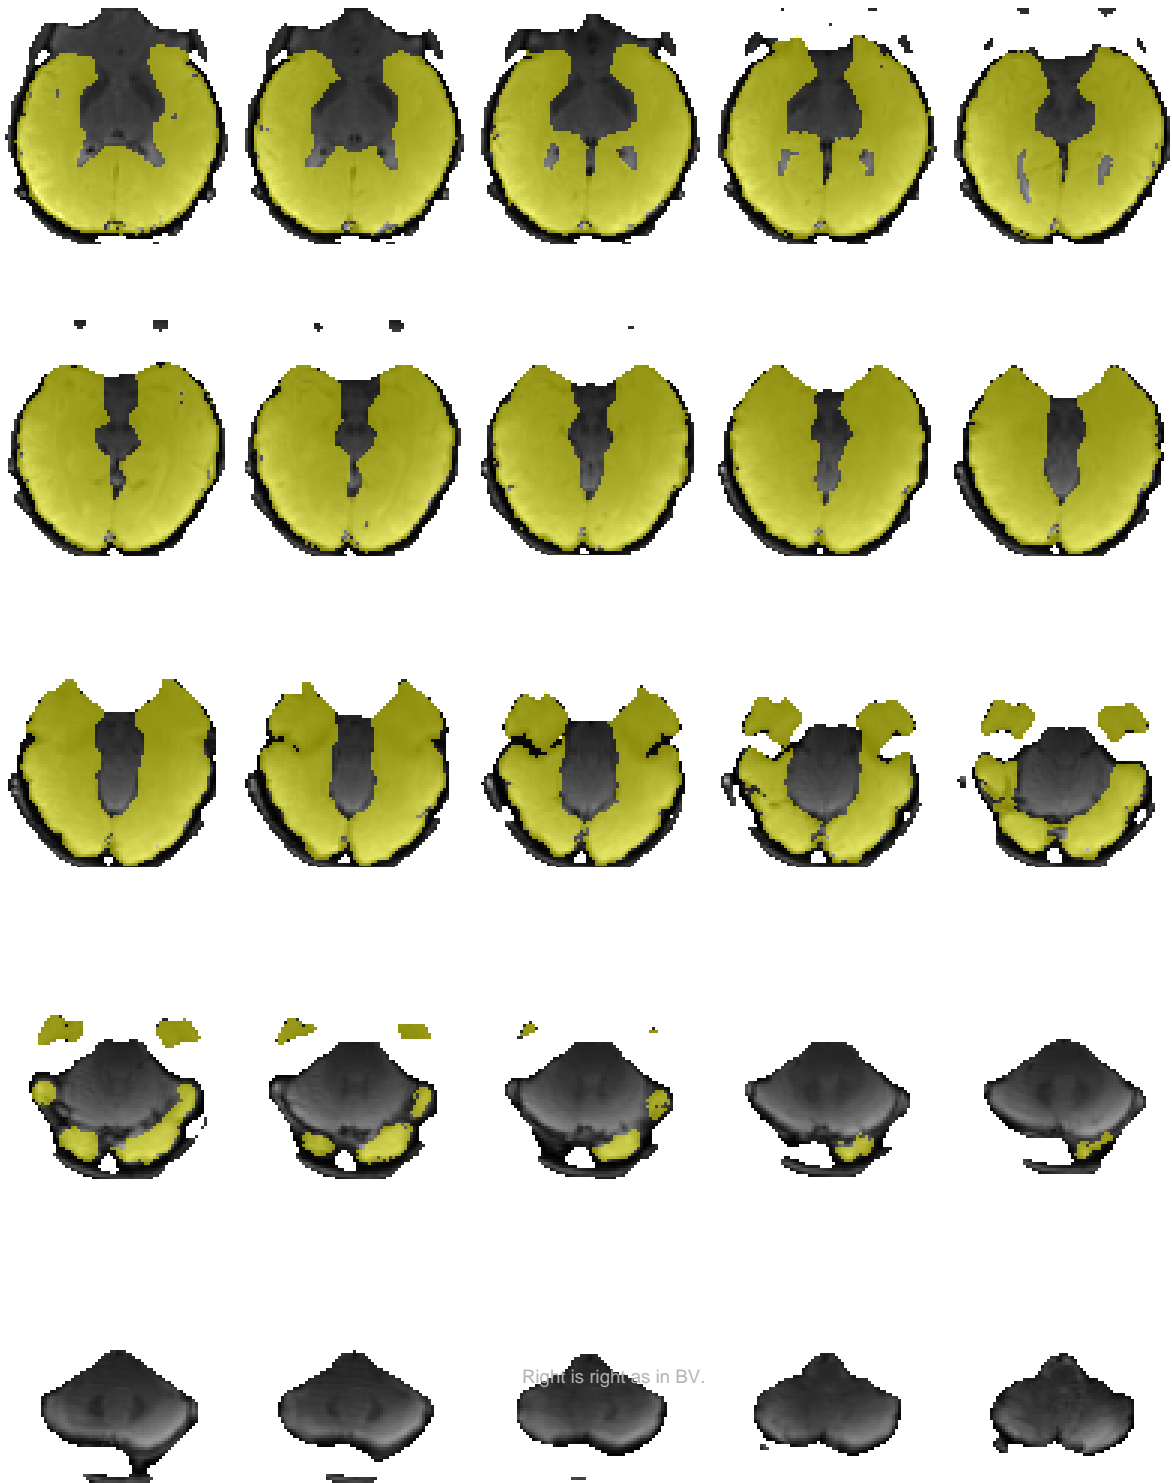



subject 4  
session 2

global segmentation: aIT (red), pIT (green), EVA (blue), subcortical (white)

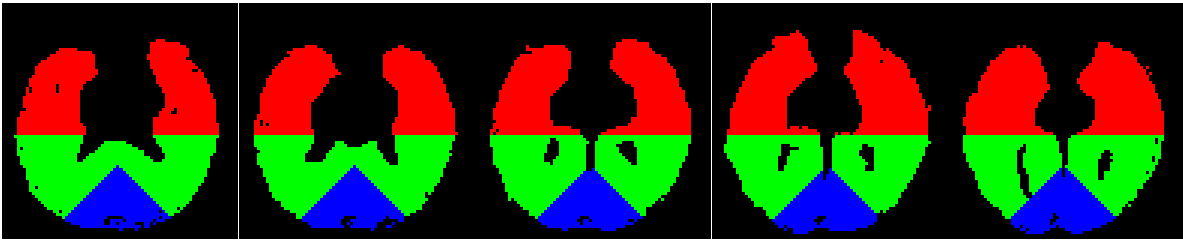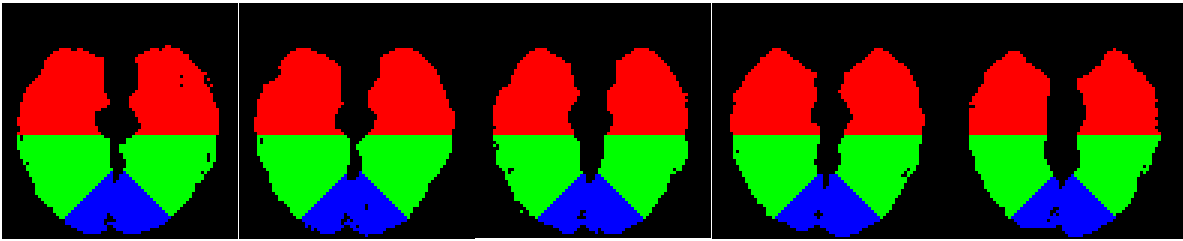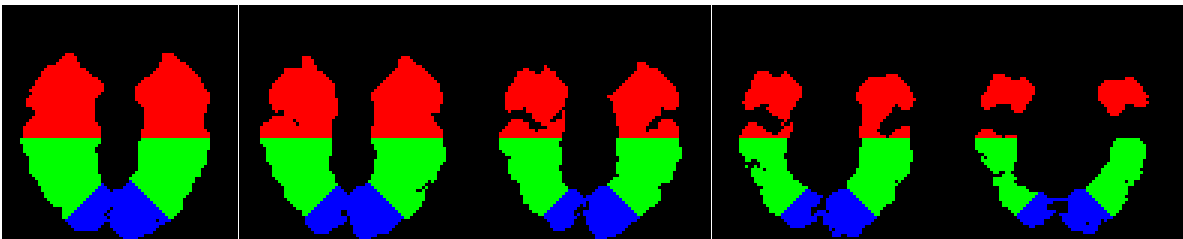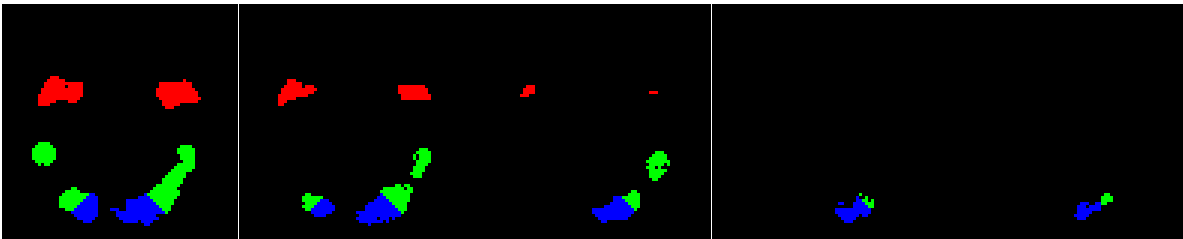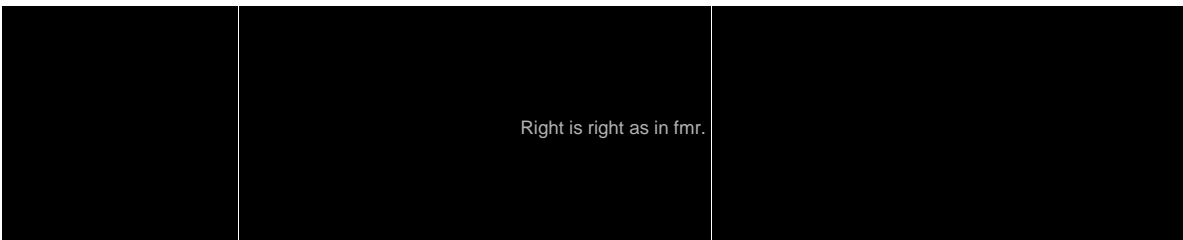

## 2. Regions of interest

ROI for EVAvisResp (224)

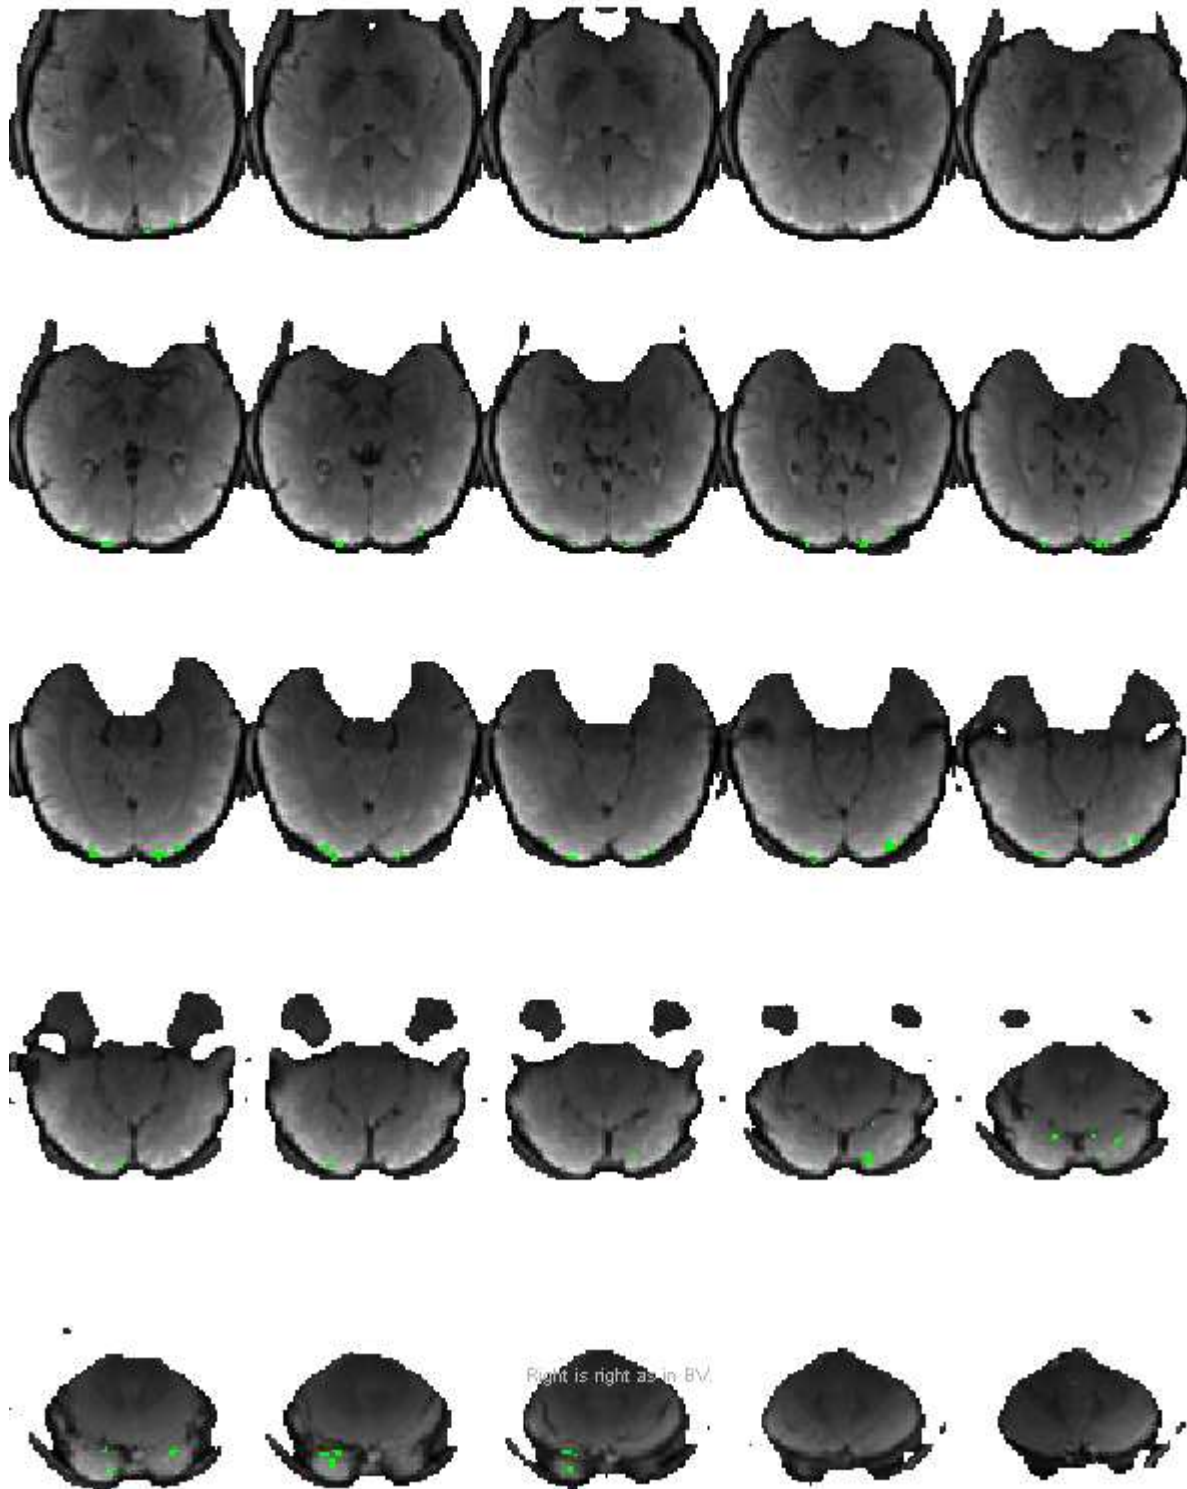

ROI for EVAvisResp (224)

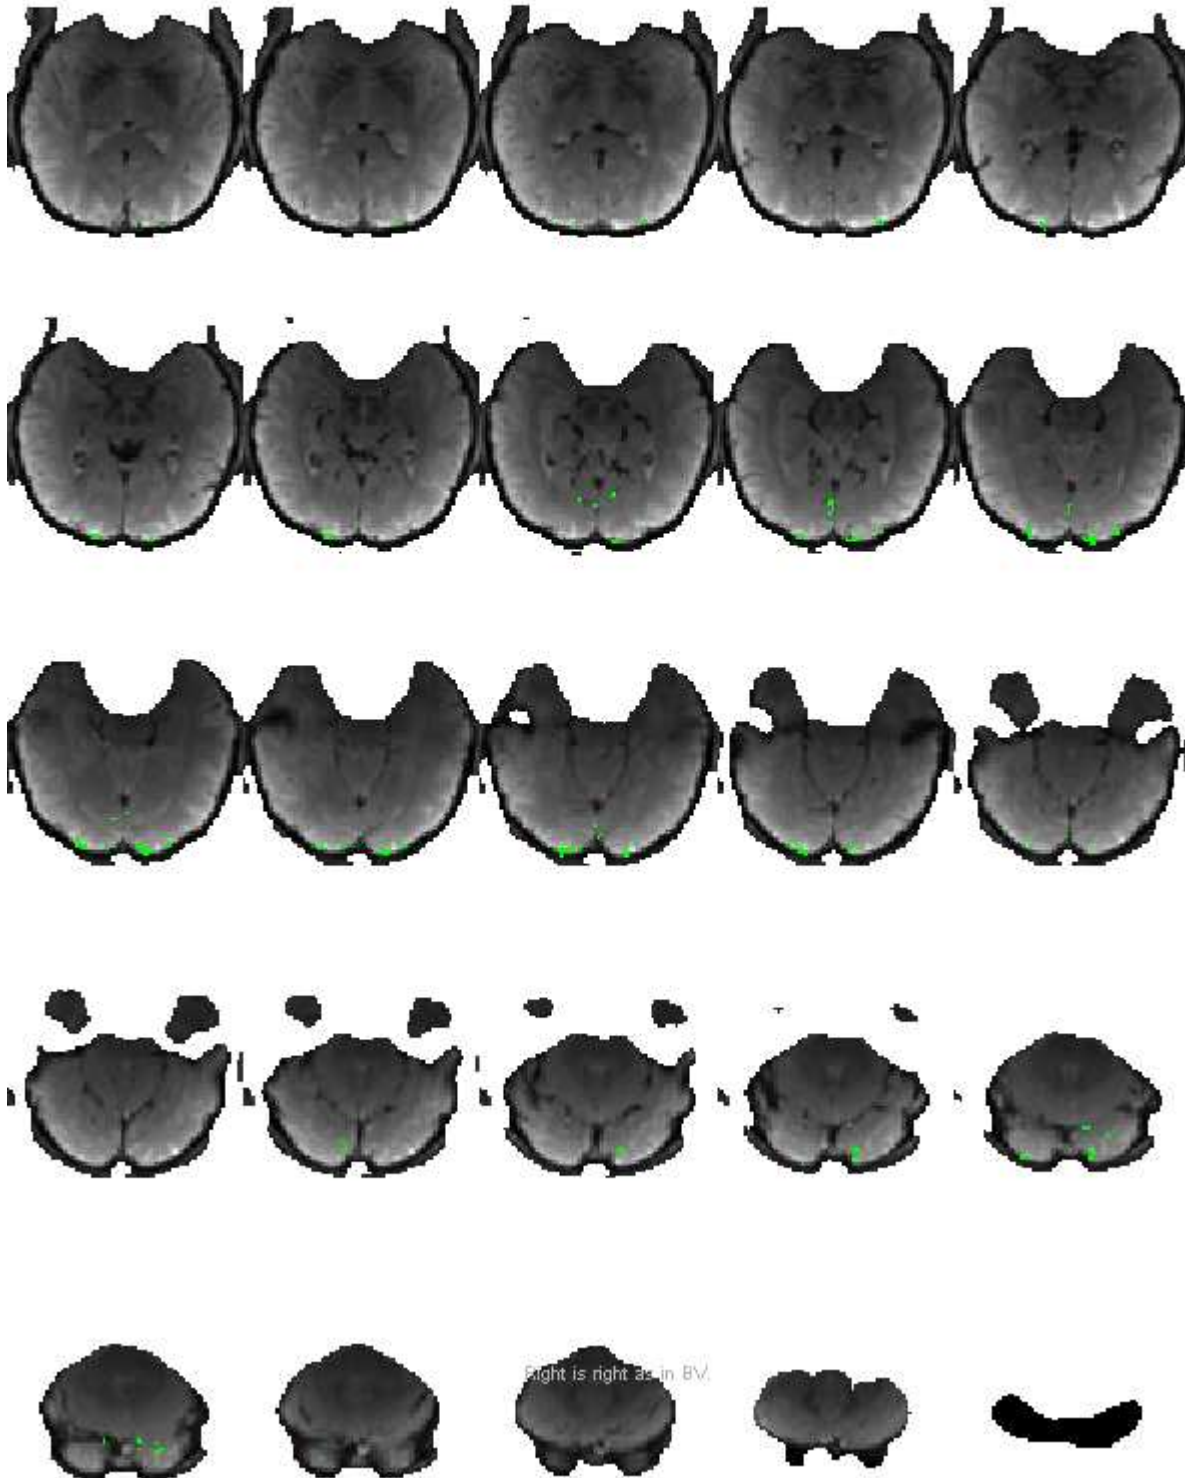

ROI for EVAvisResp (224)

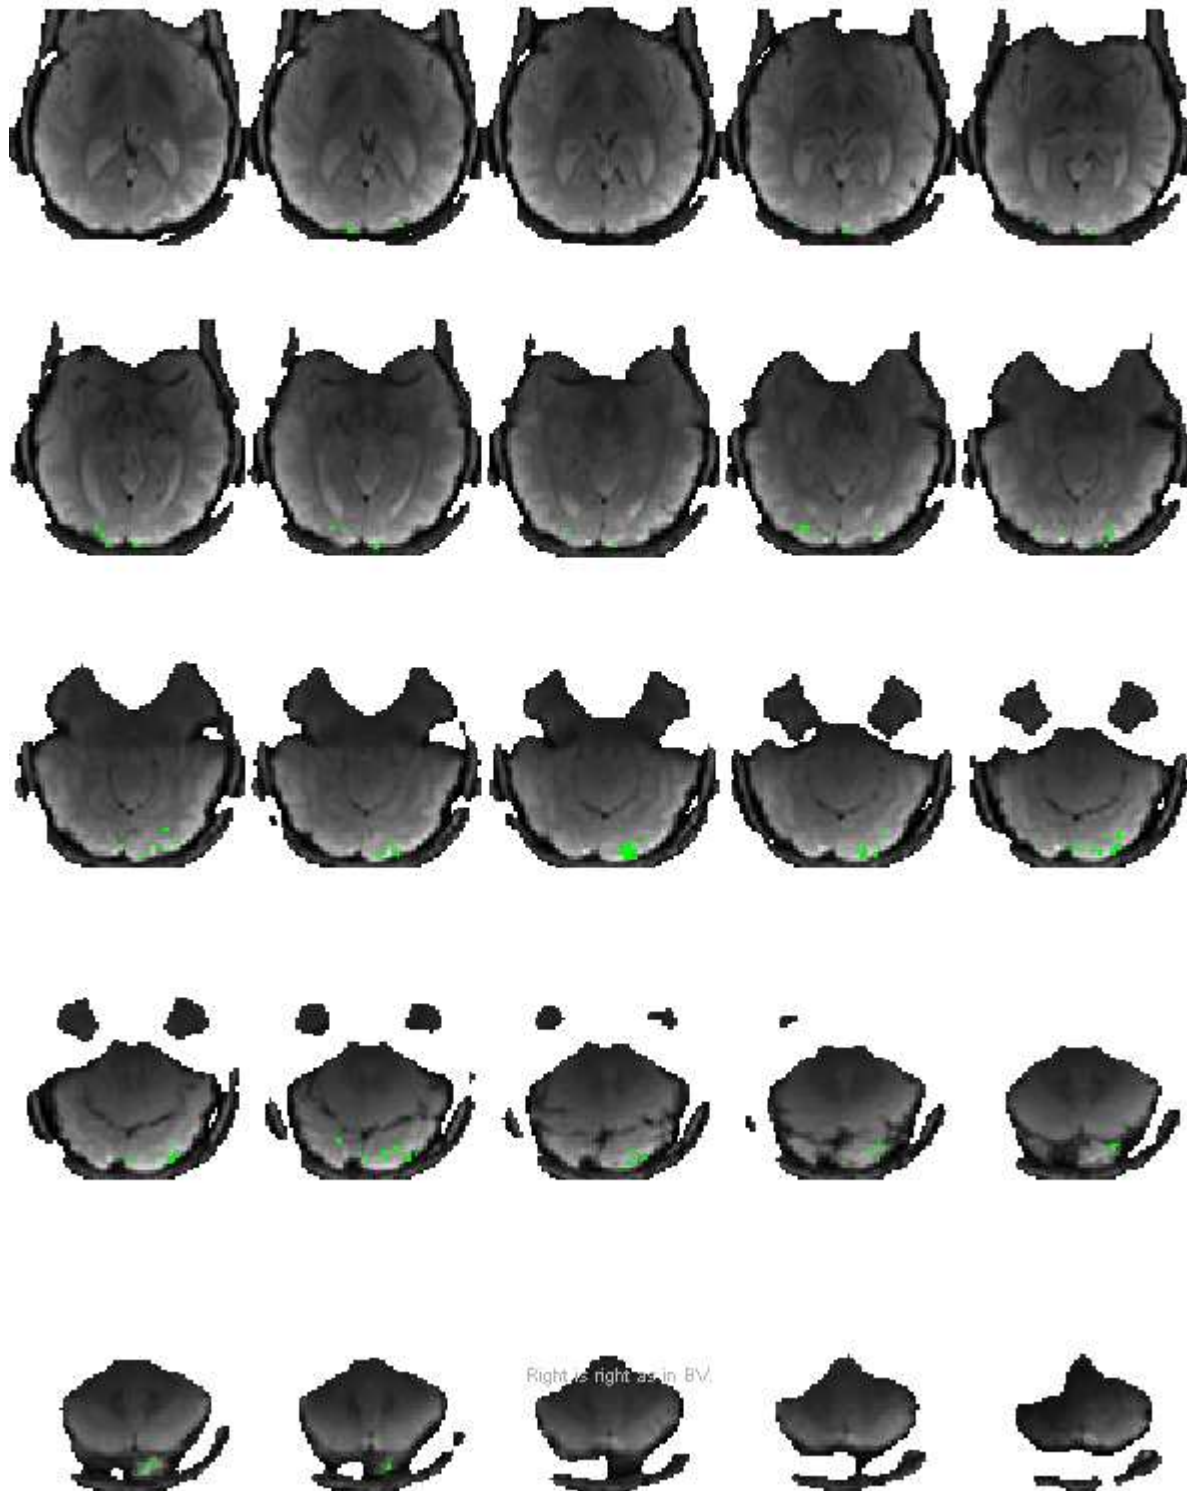

ROI for EVAvisResp (224)

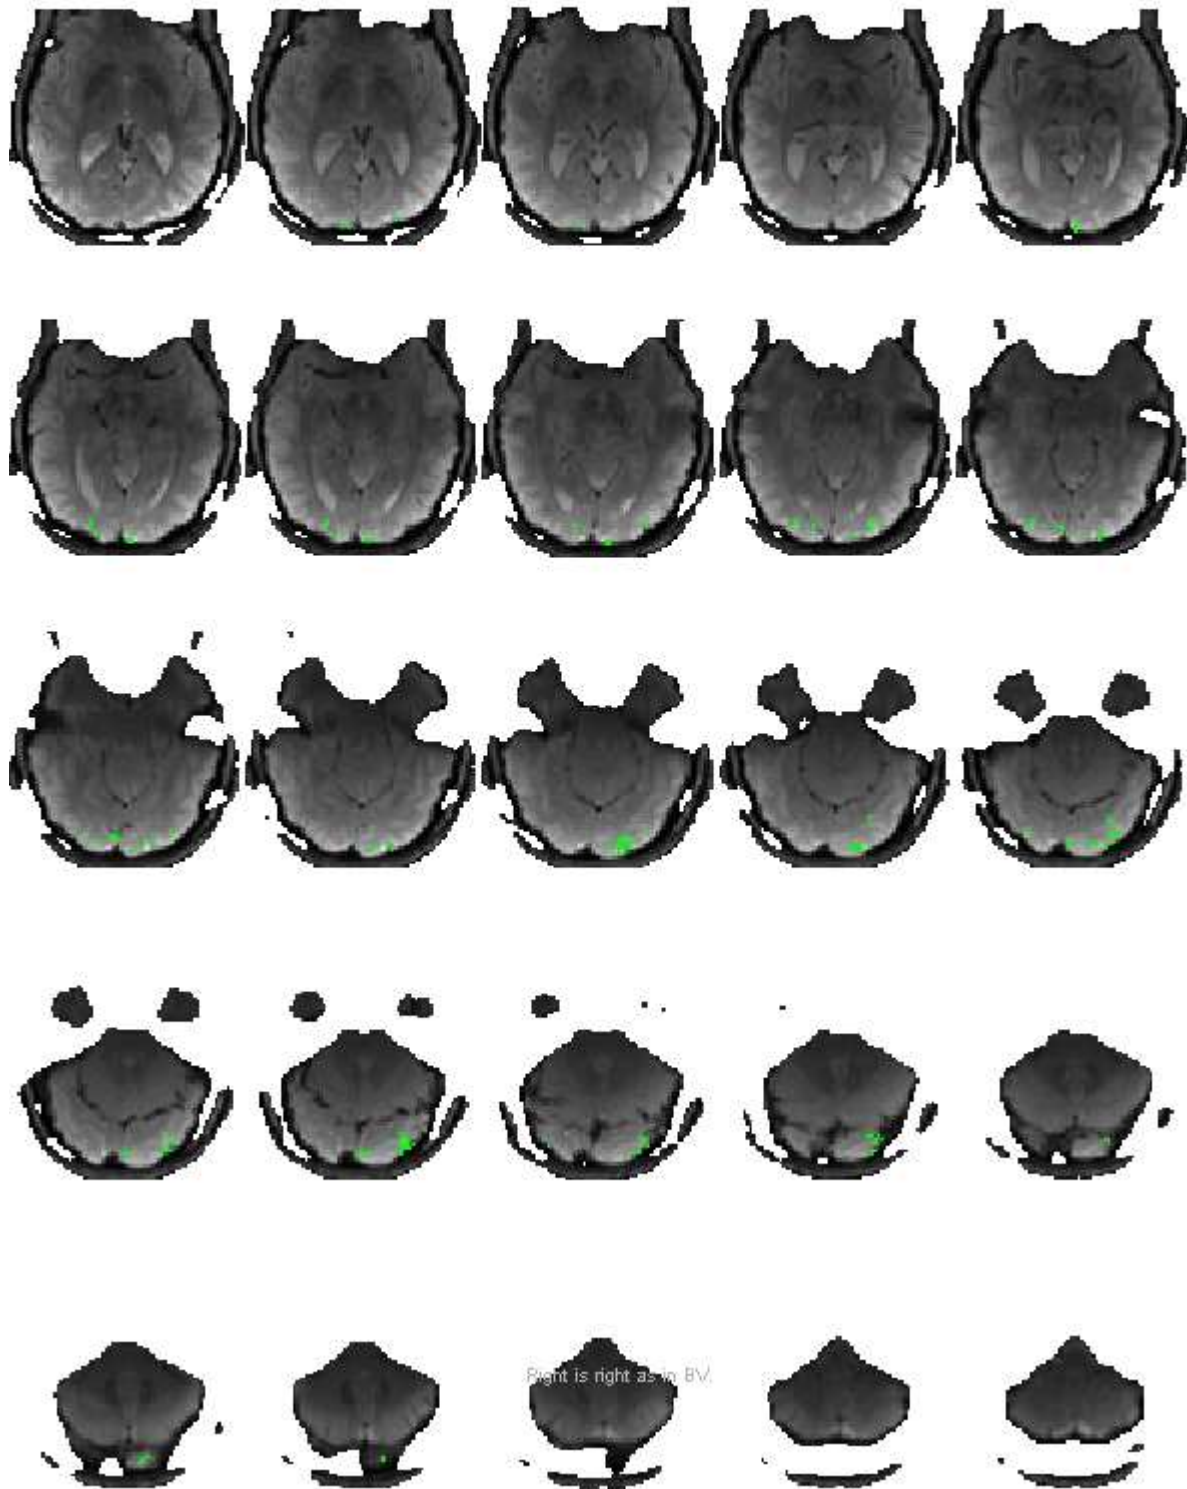



ROI for EVAvisResp (224)

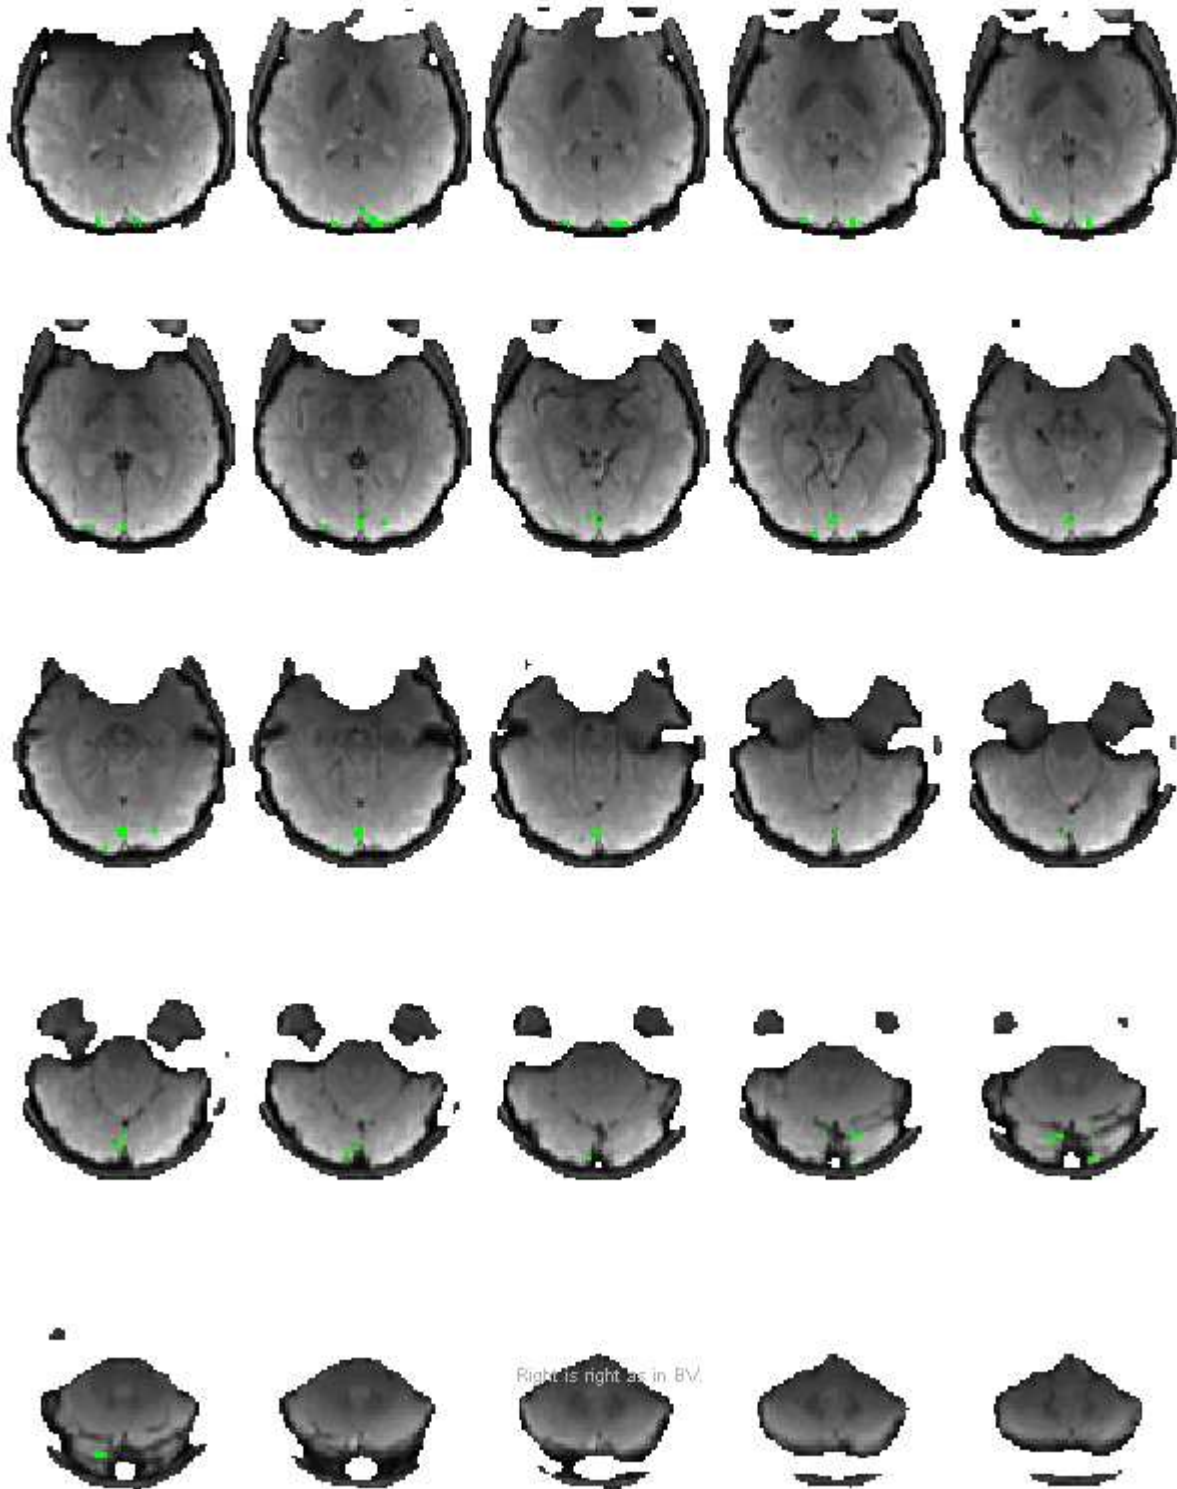

ROI for EVAvisResp (224)

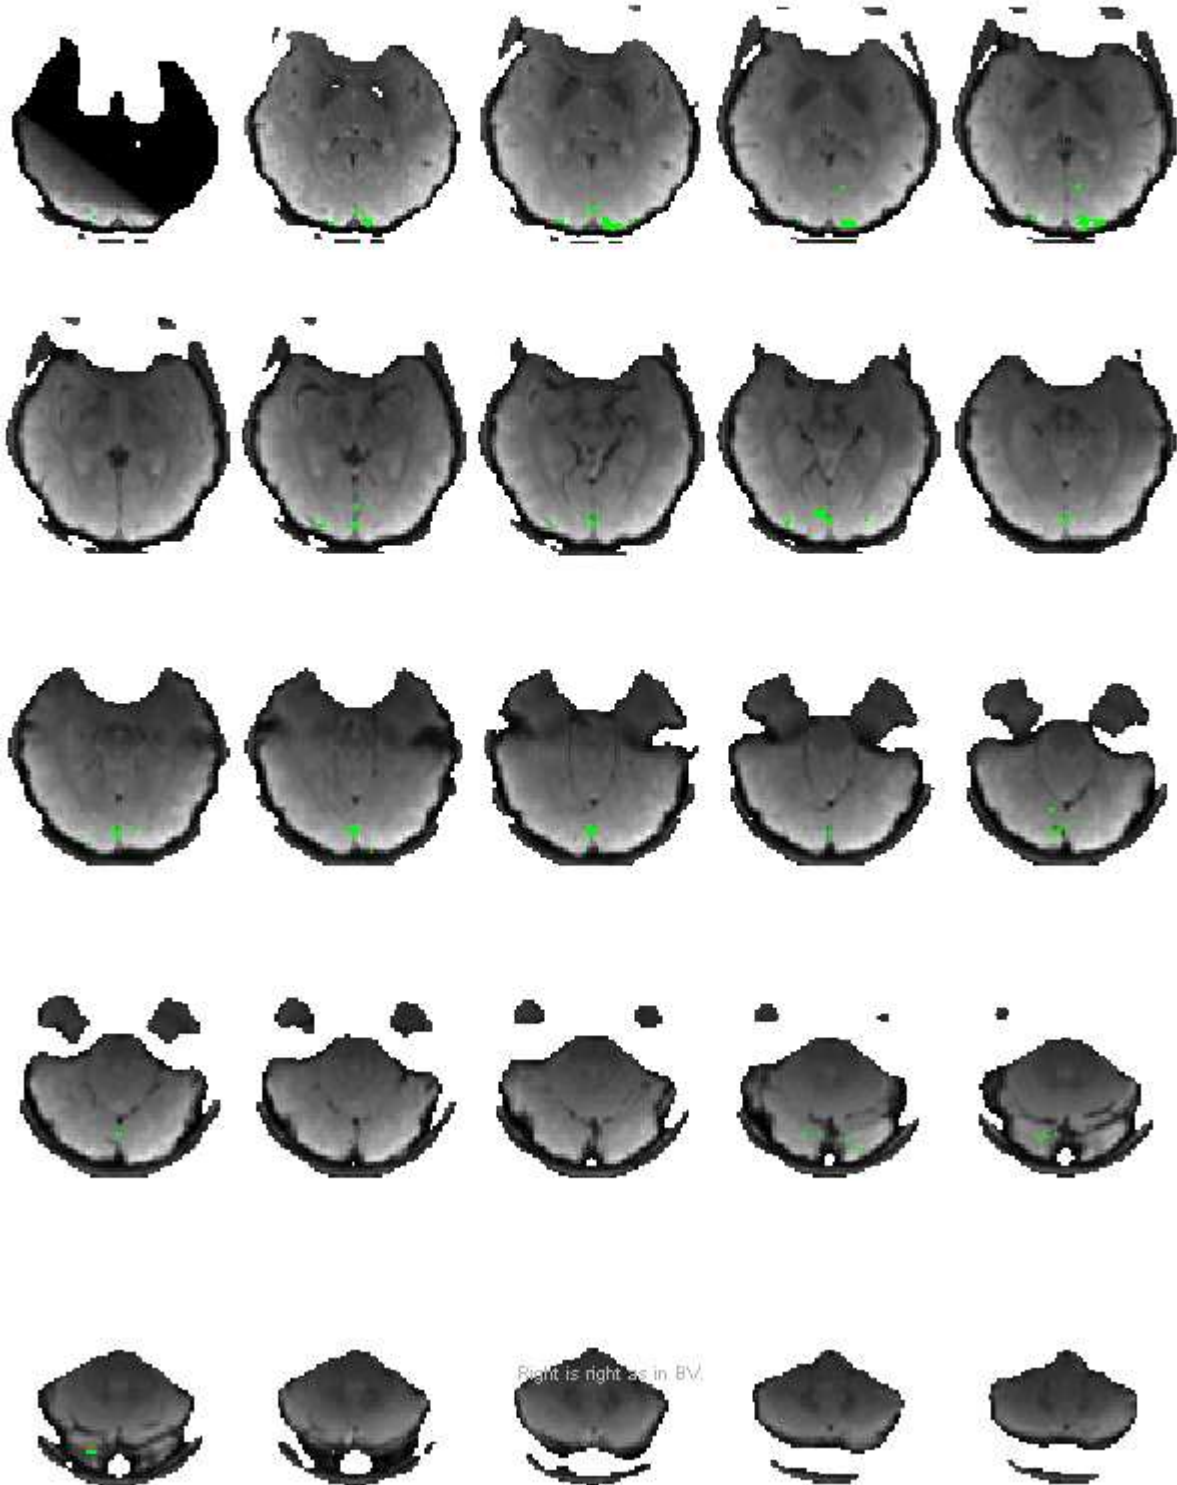



ROI for EVAvisResp (224)

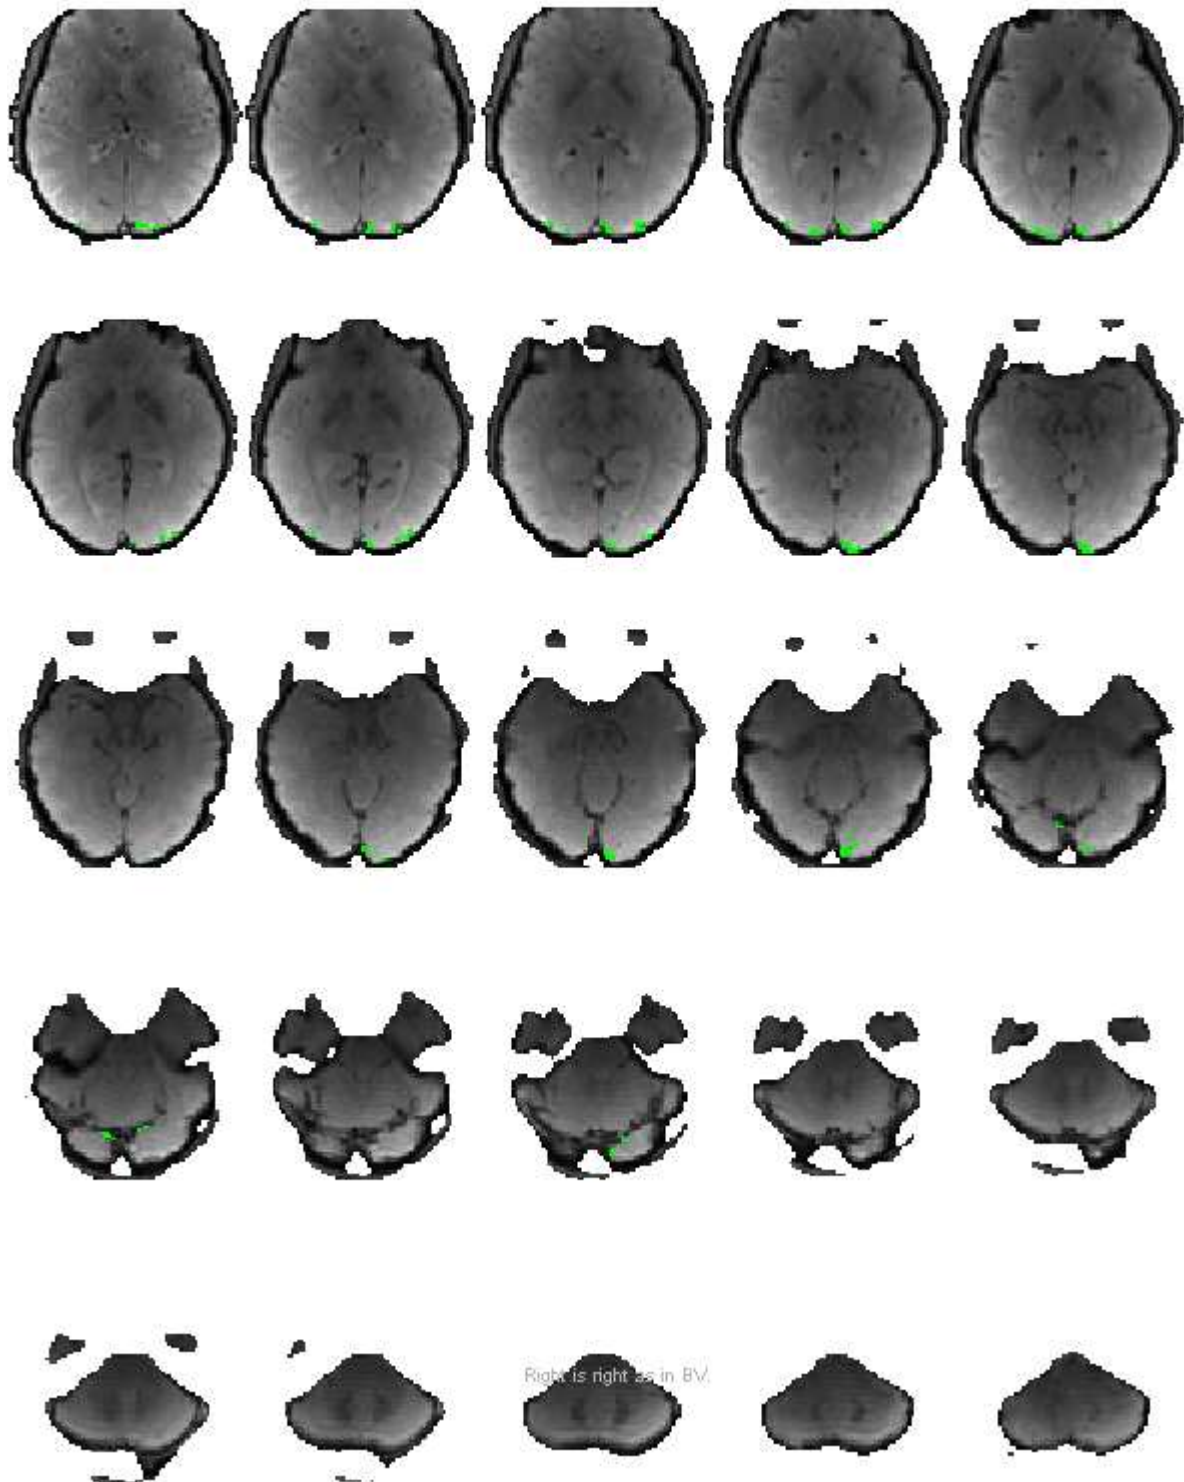

ROI for EVAvisResp (224)

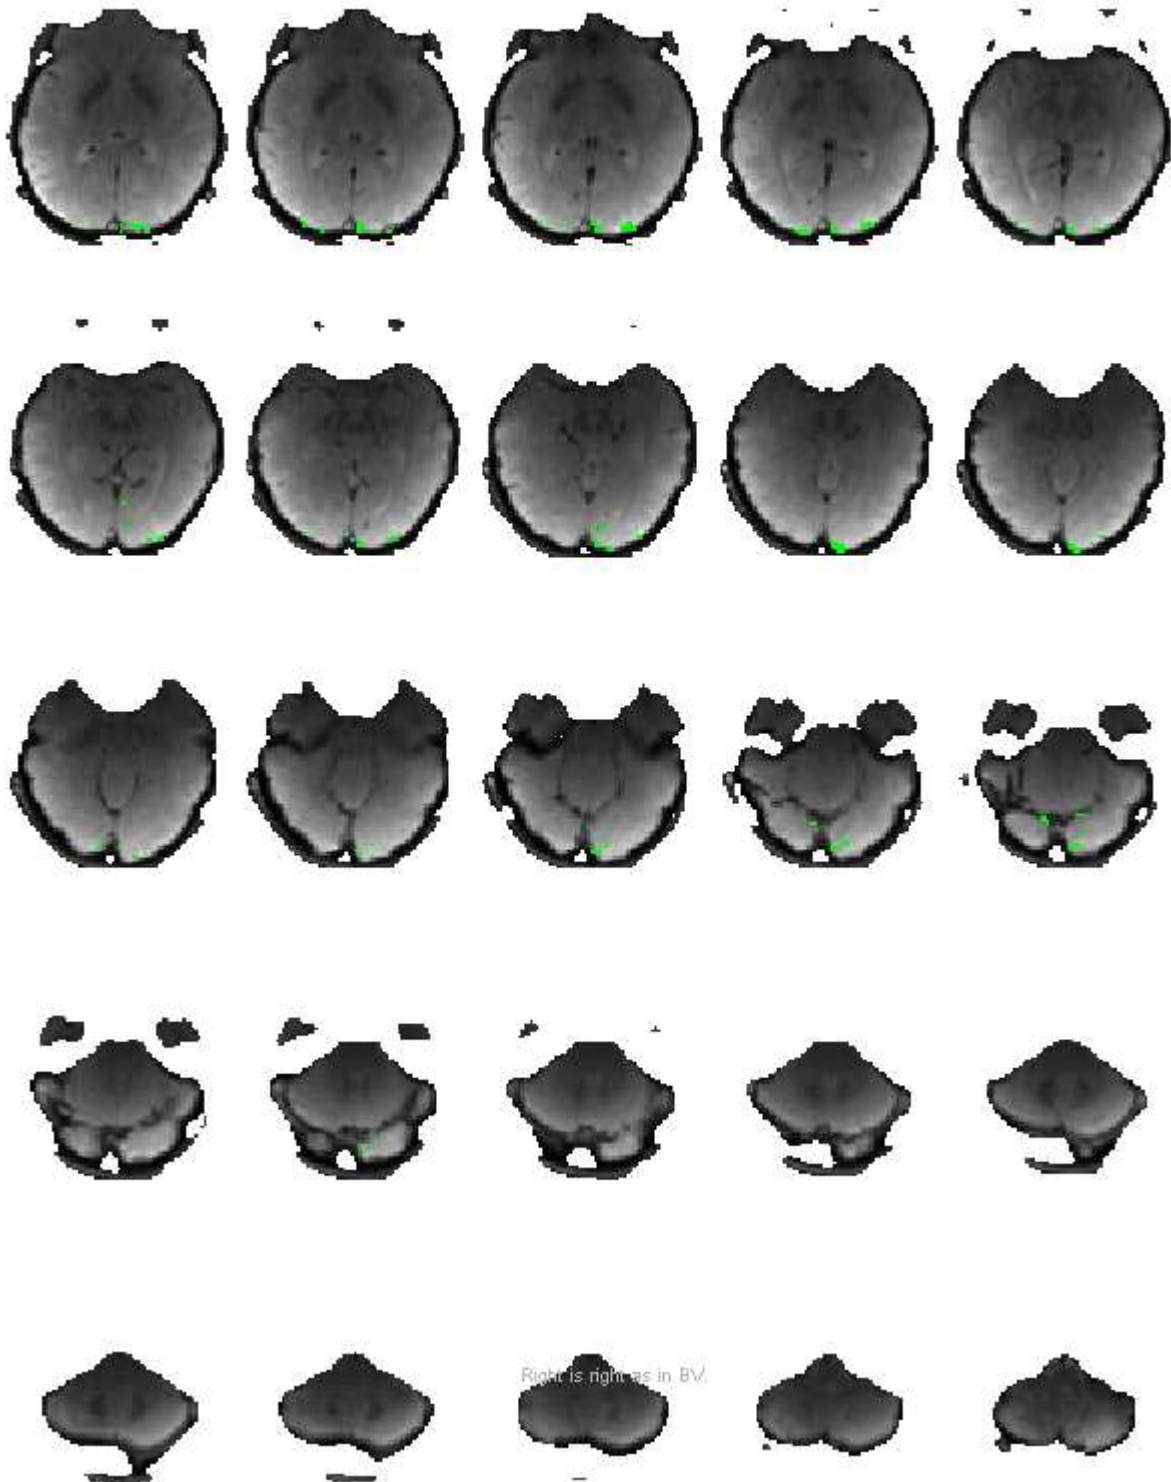

ROI for hIT without (FFA, PPA) (316)

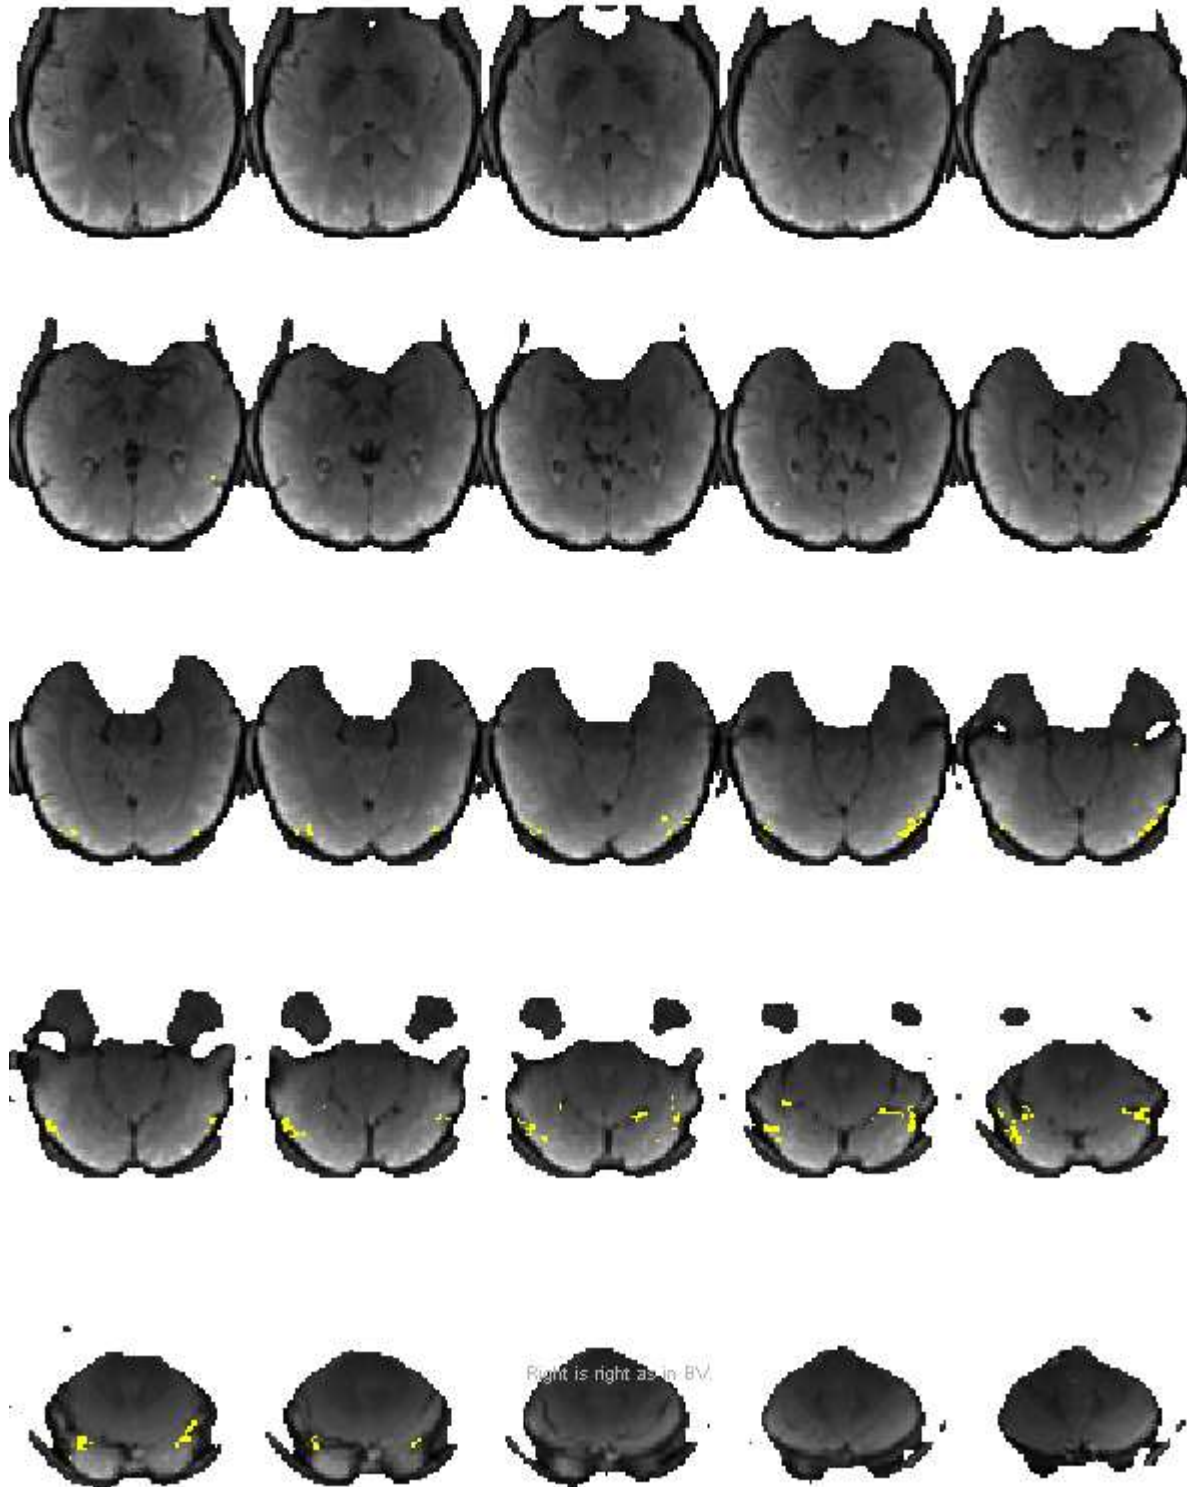

ROI for hIT without (FFA, PPA) (316)

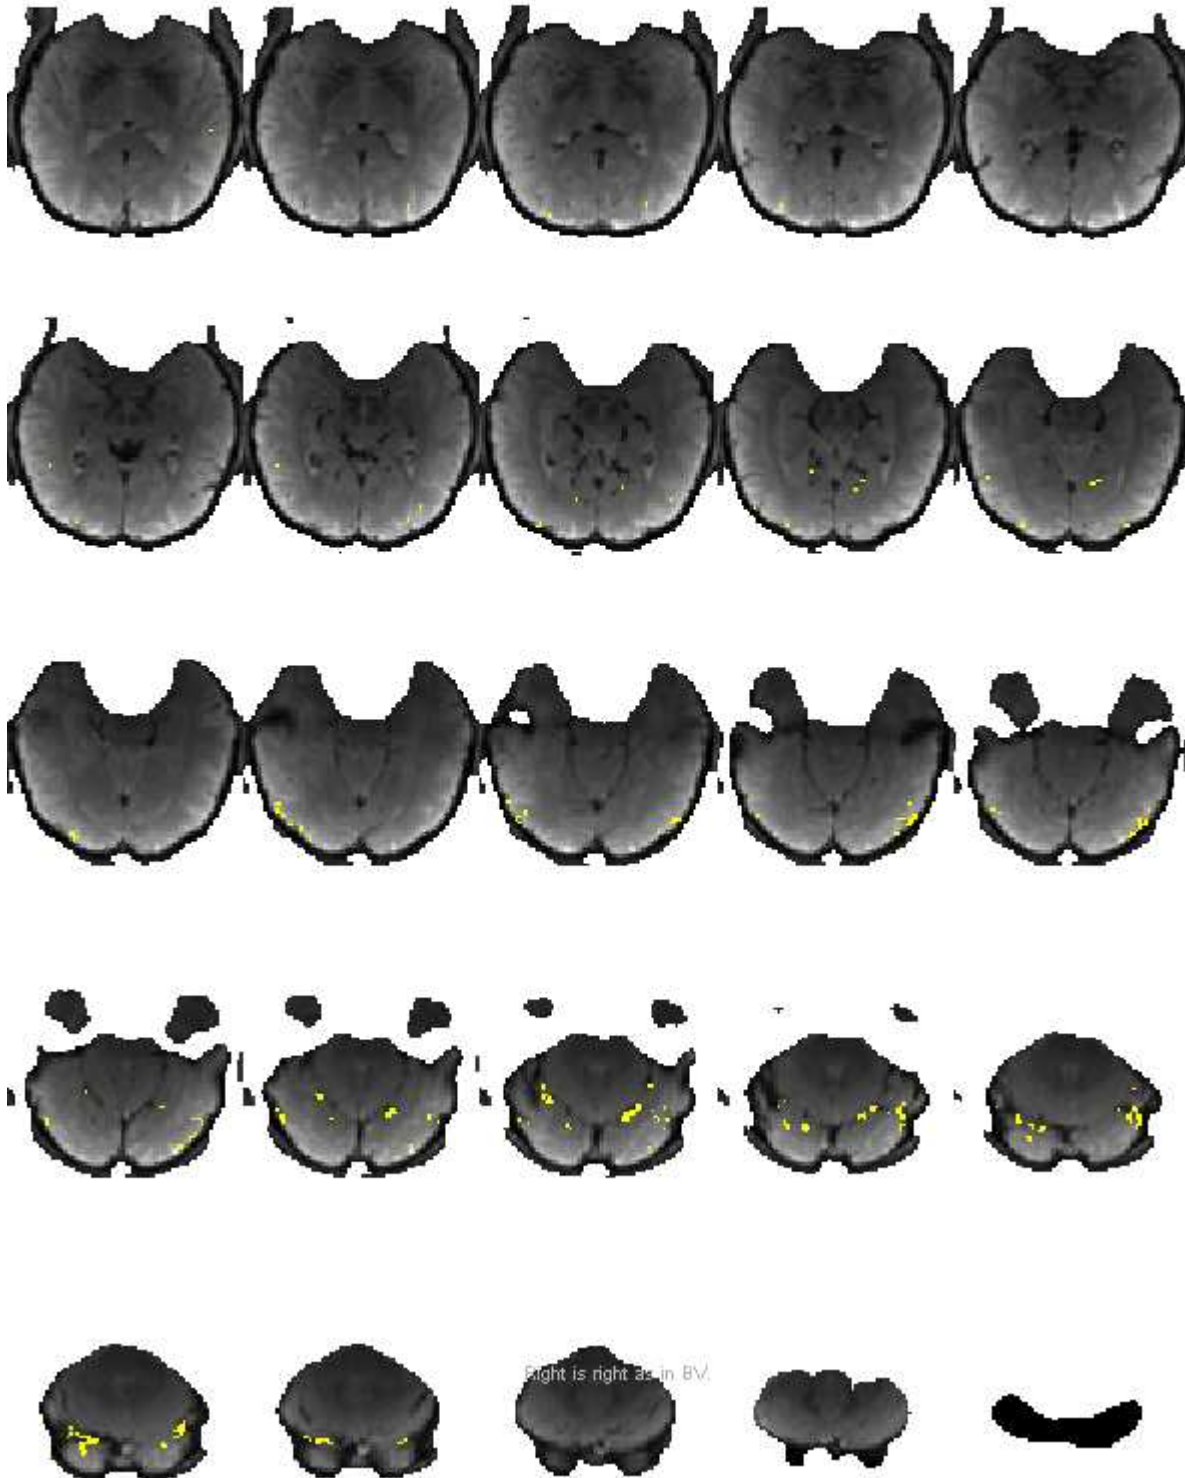



ROI for hIT without (FFA, PPA) (316)

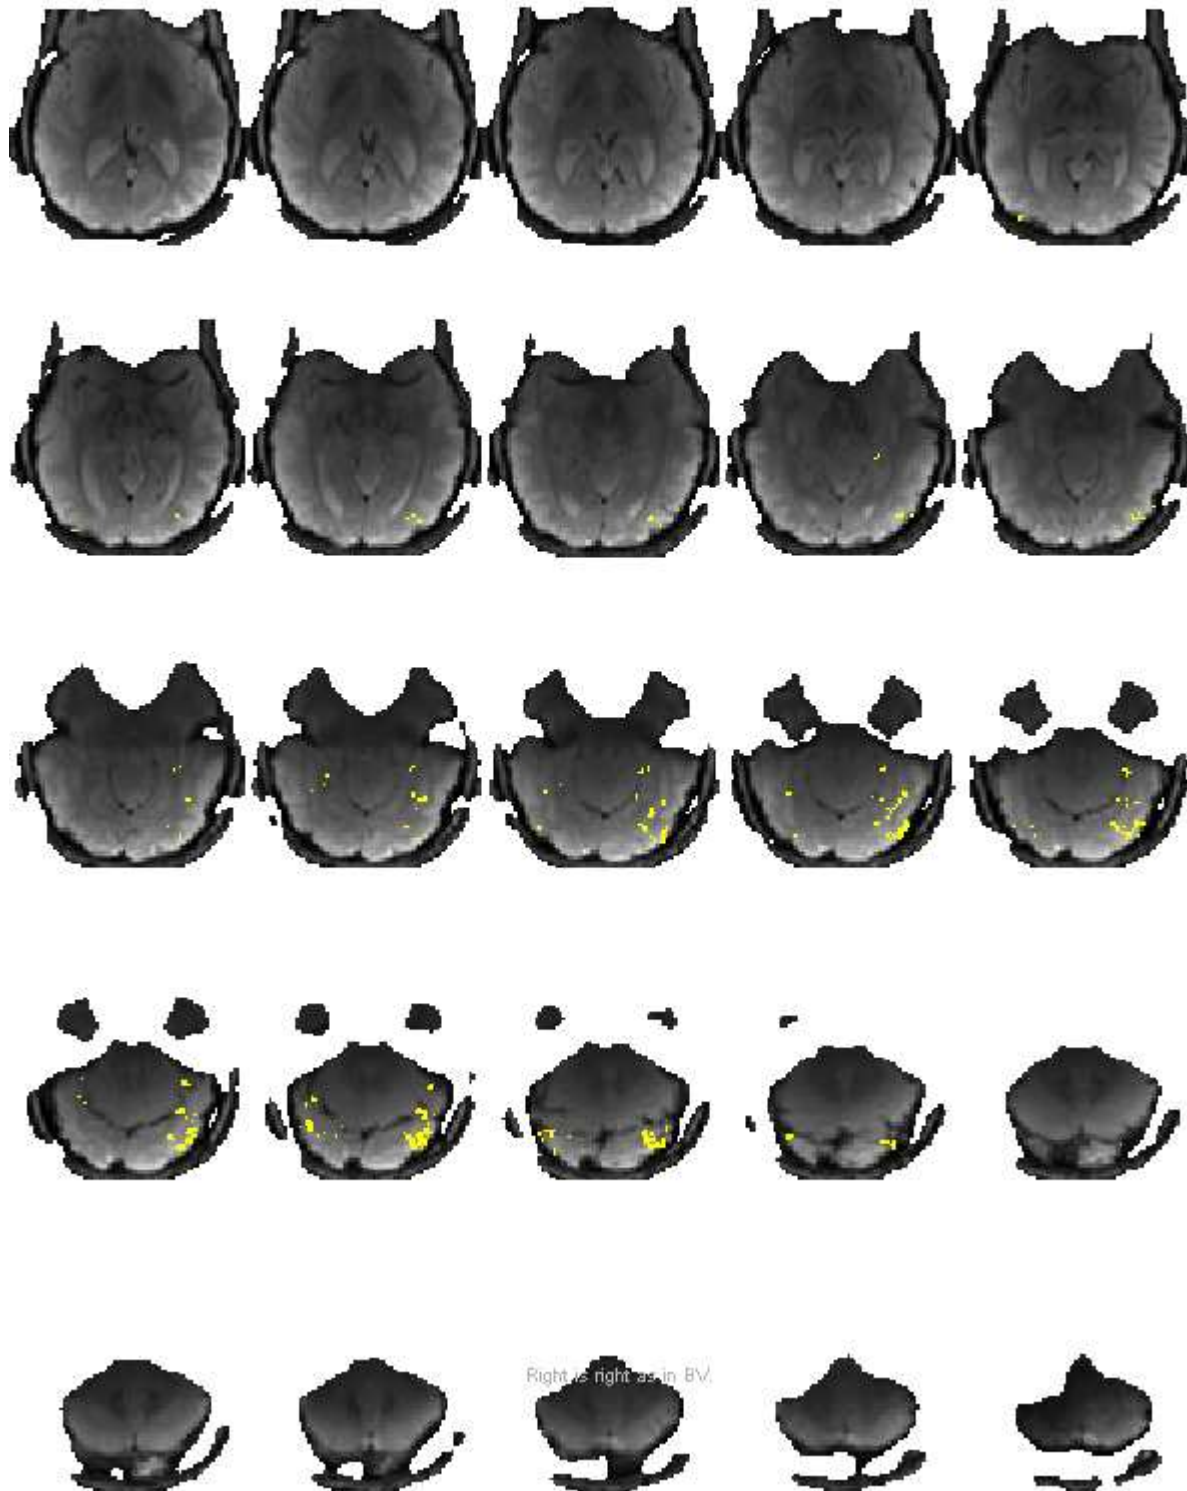

ROI for hIT without (FFA, PPA) (316)

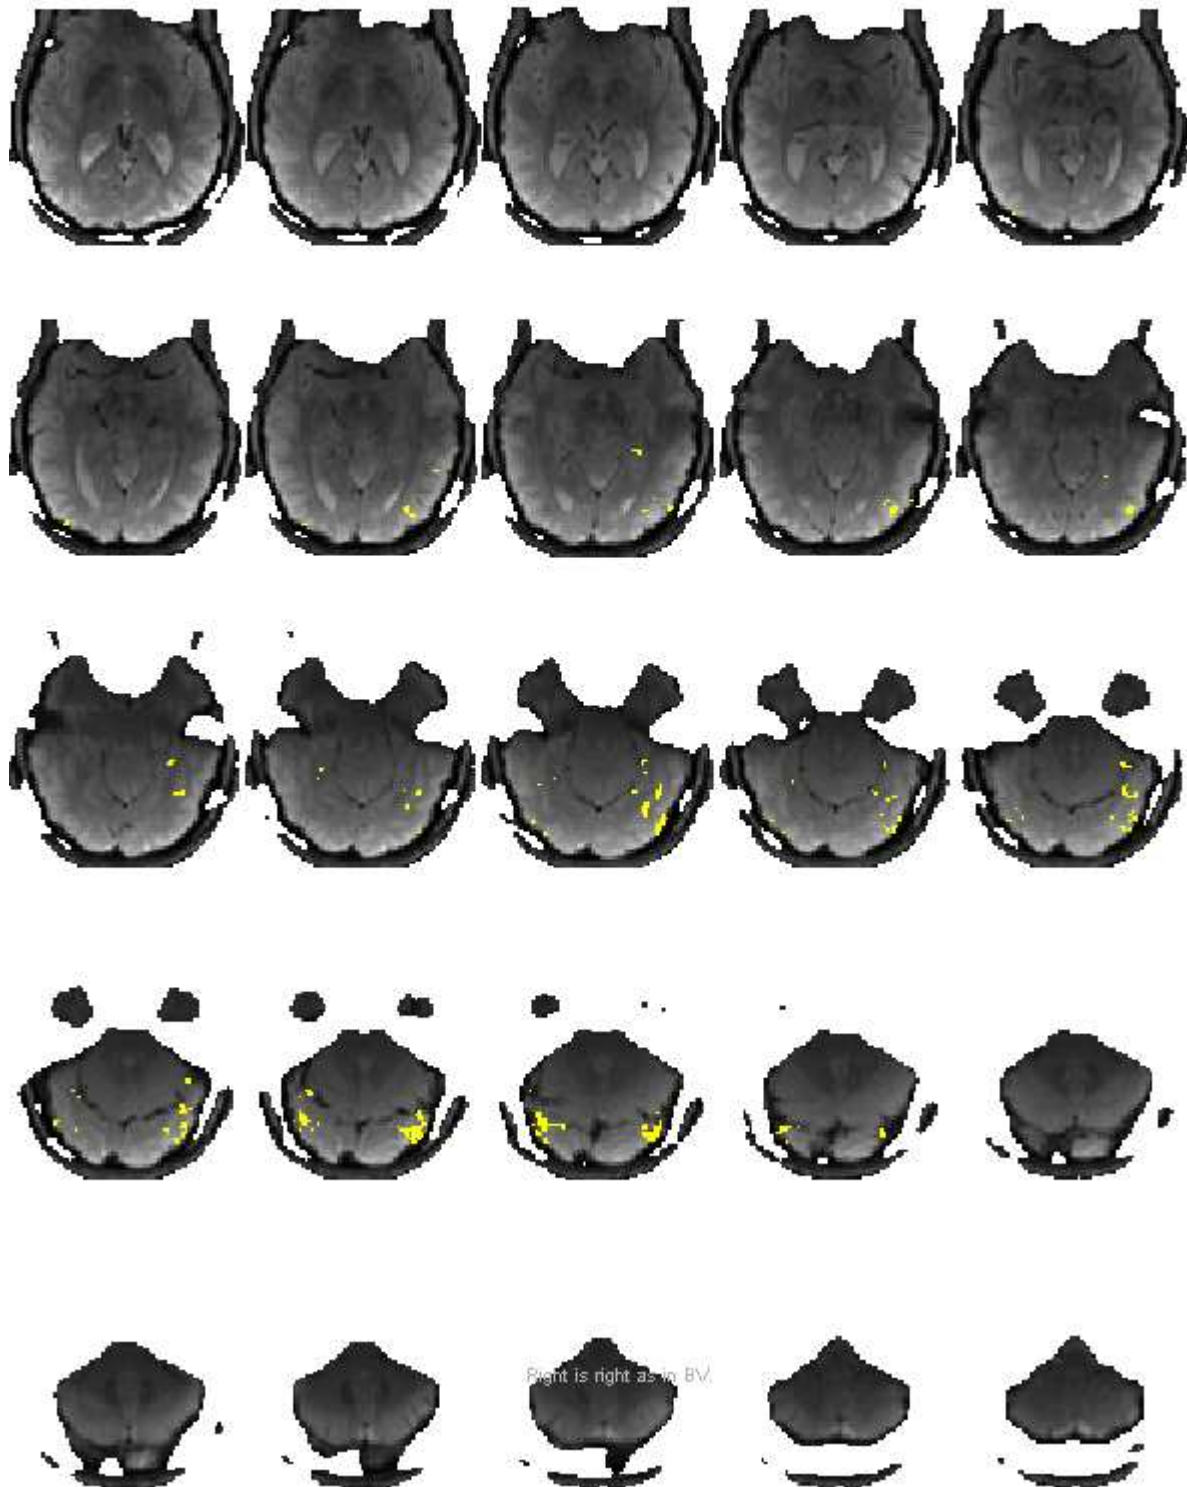

ROI for hIT without (FFA, PPA) (316)

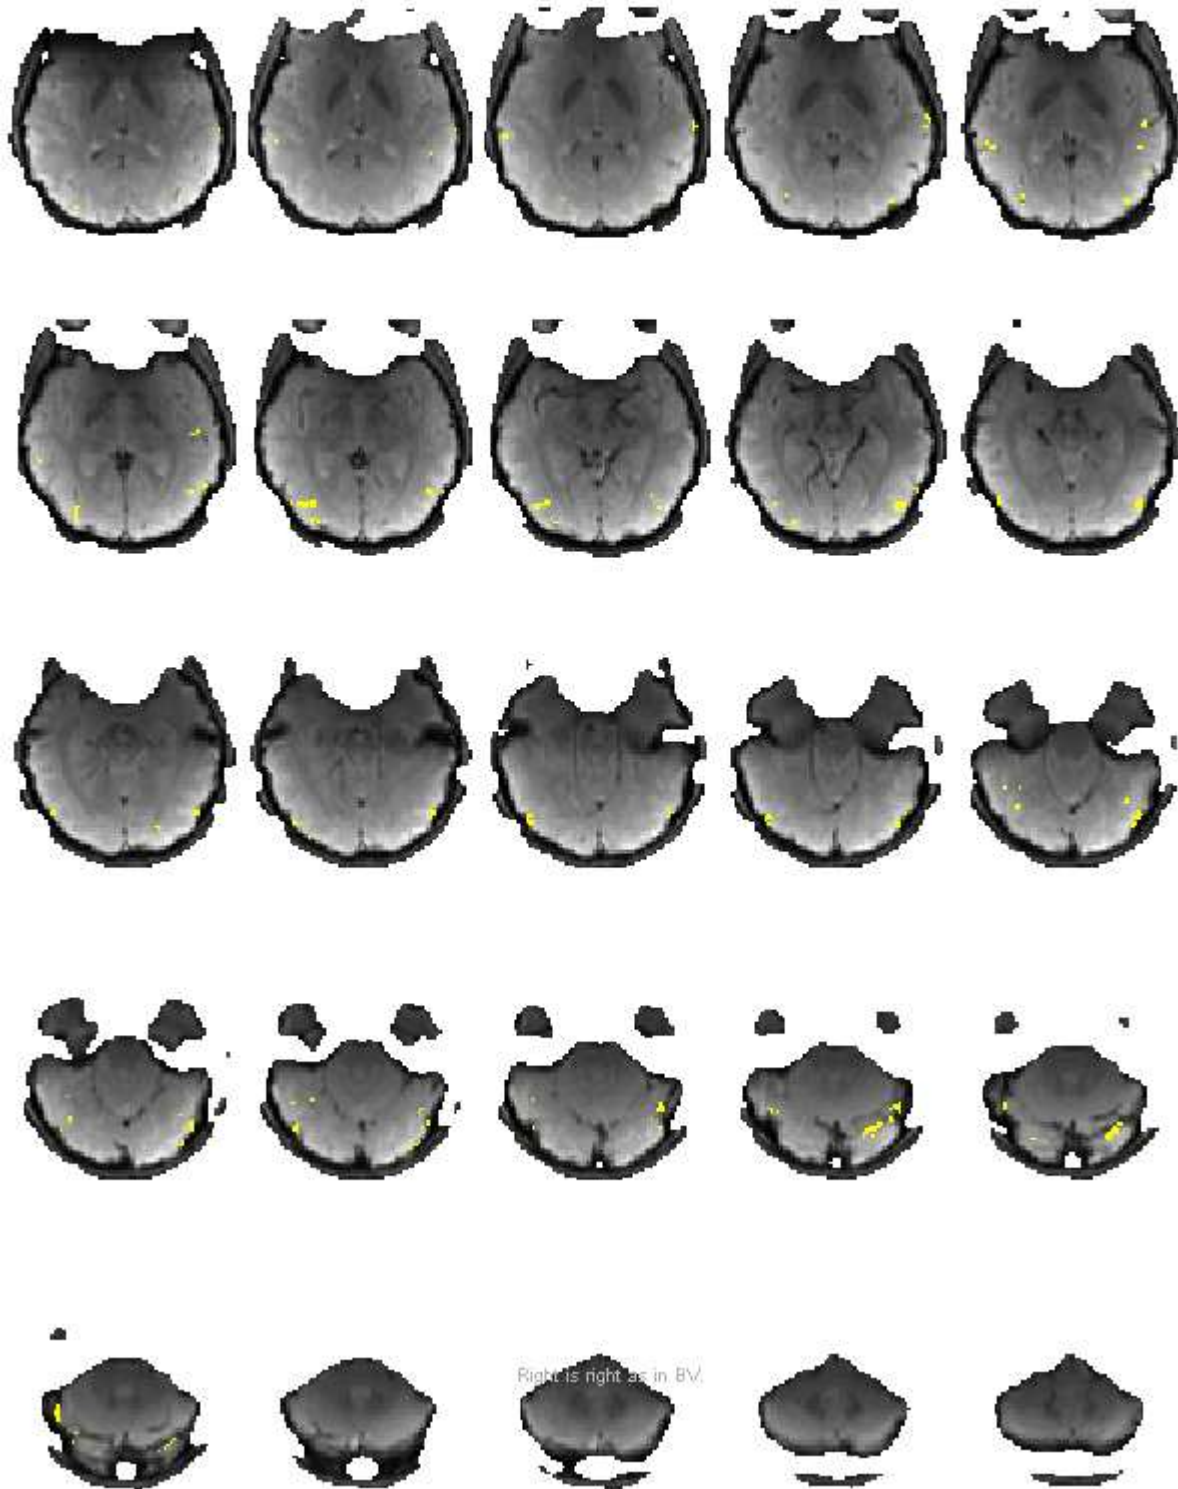

ROI for hIT without (FFA, PPA) (316)

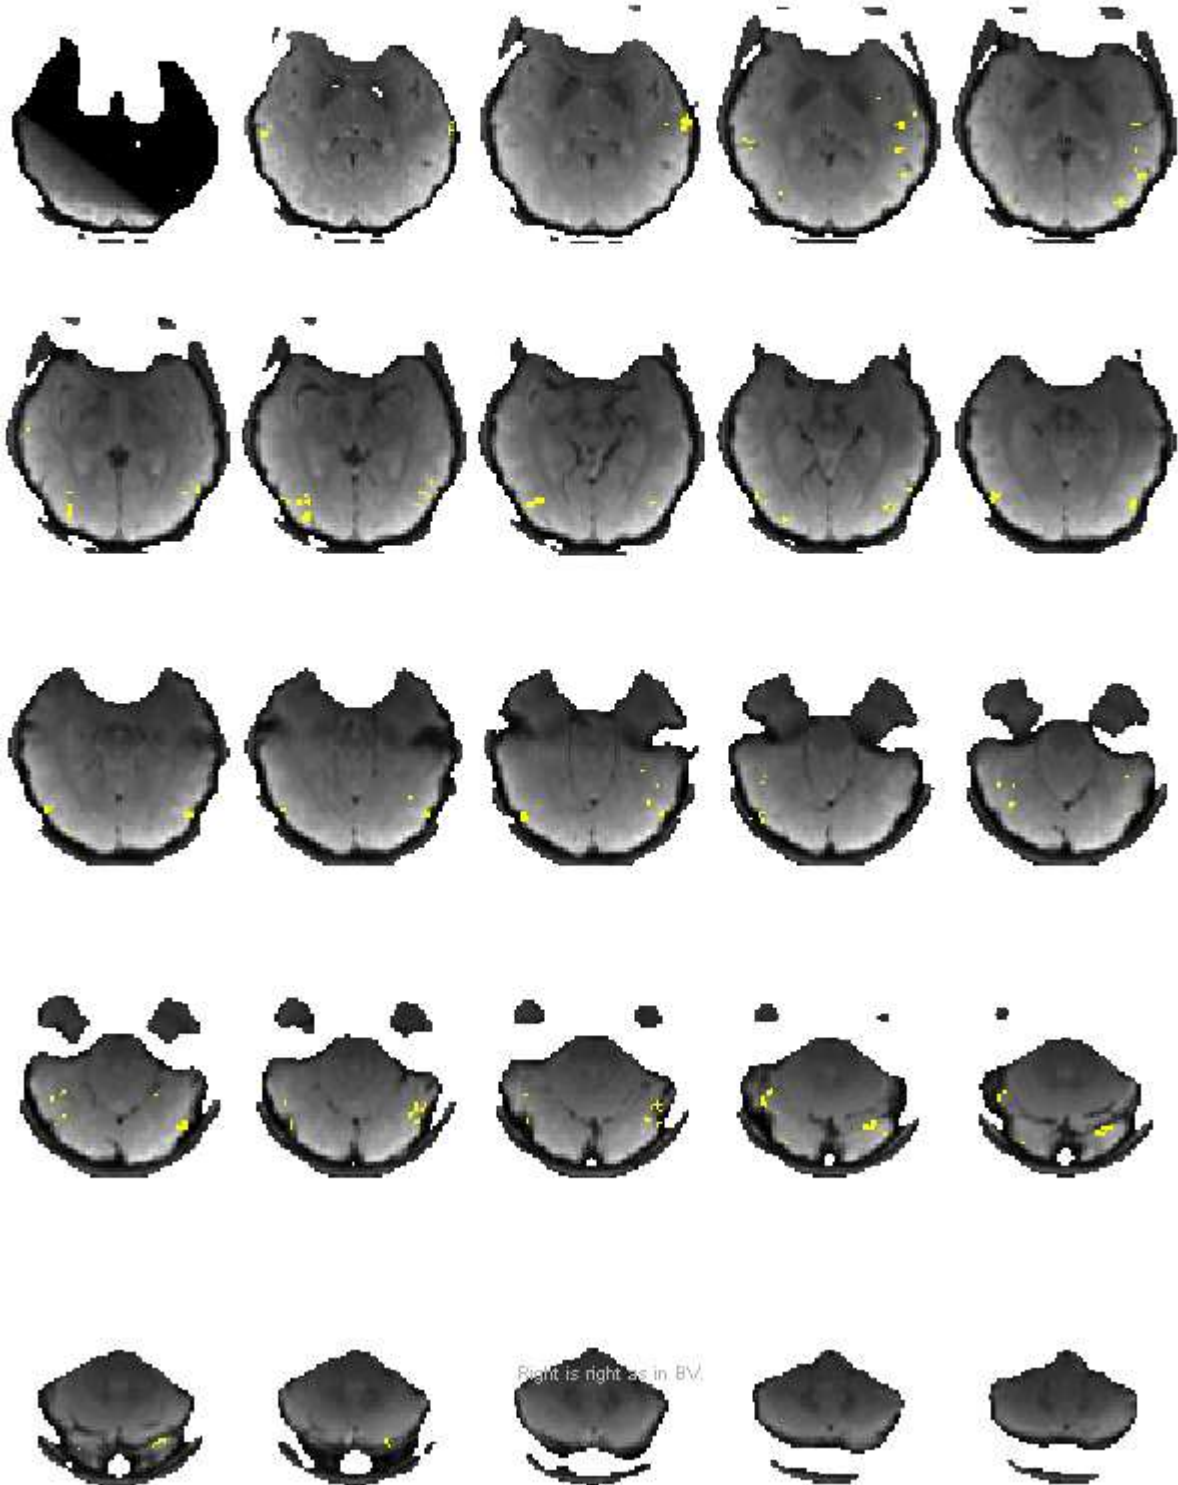



ROI for hIT without (FFA, PPA) (316)

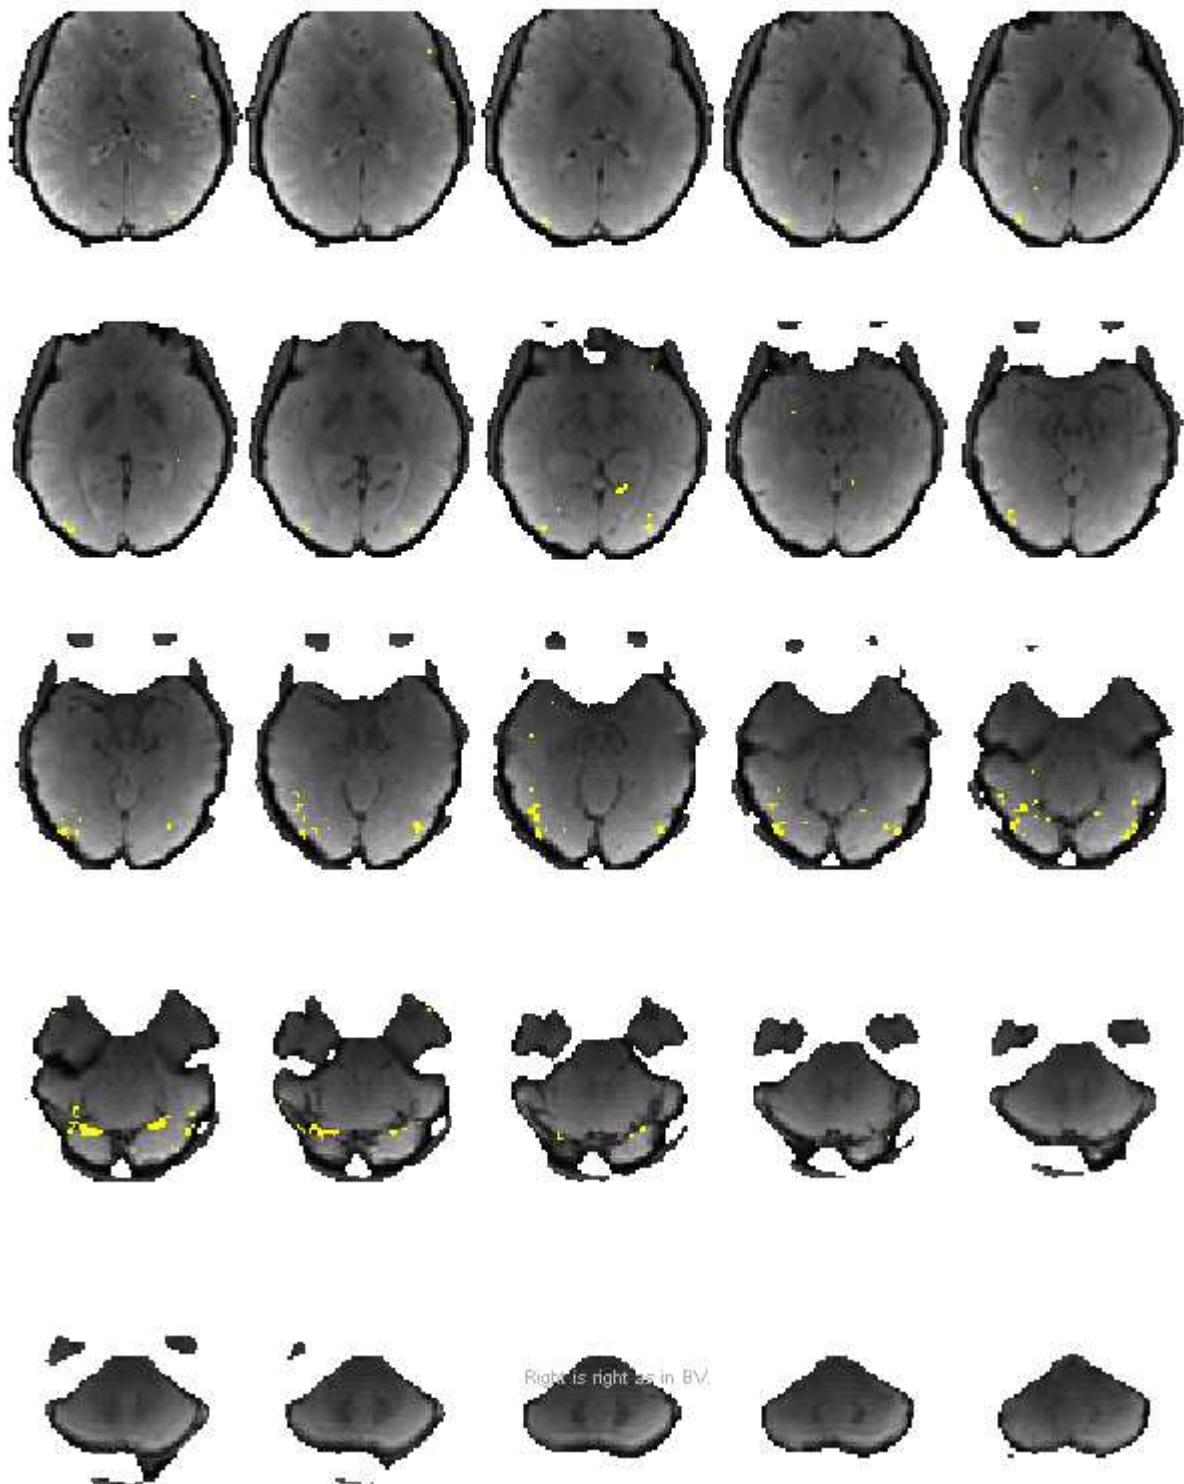

ROI for hIT without (FFA, PPA) (316)

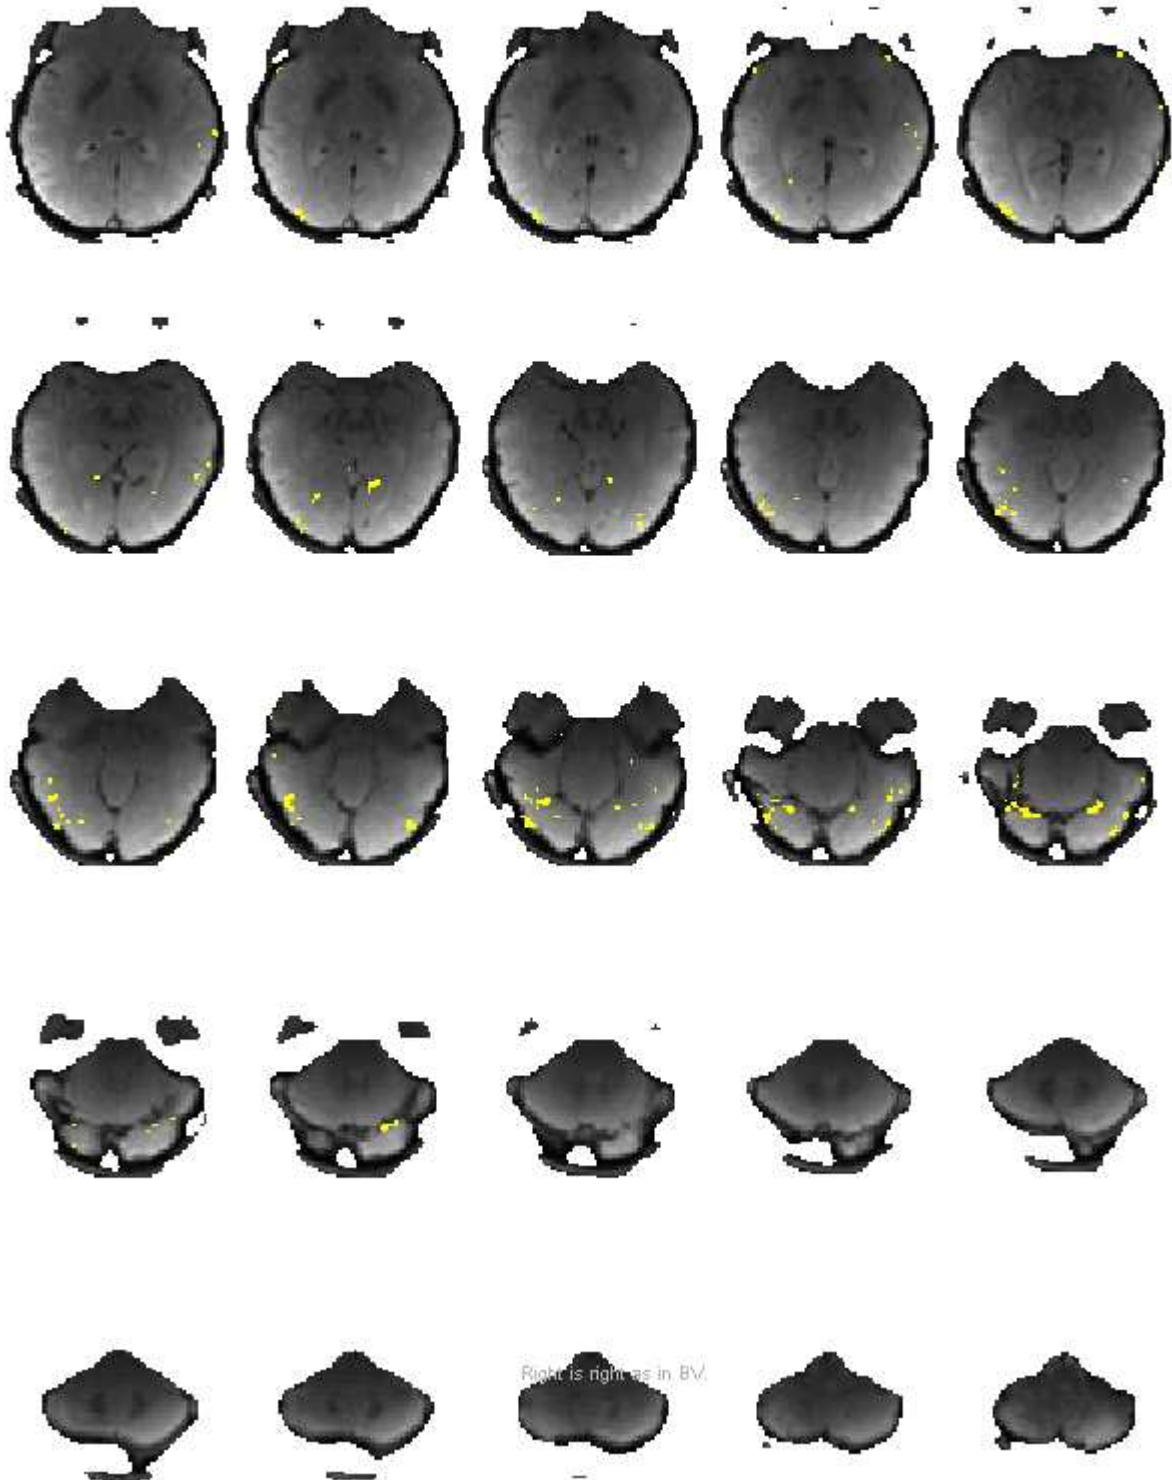

ROI for FFA<sub>L</sub> (128)

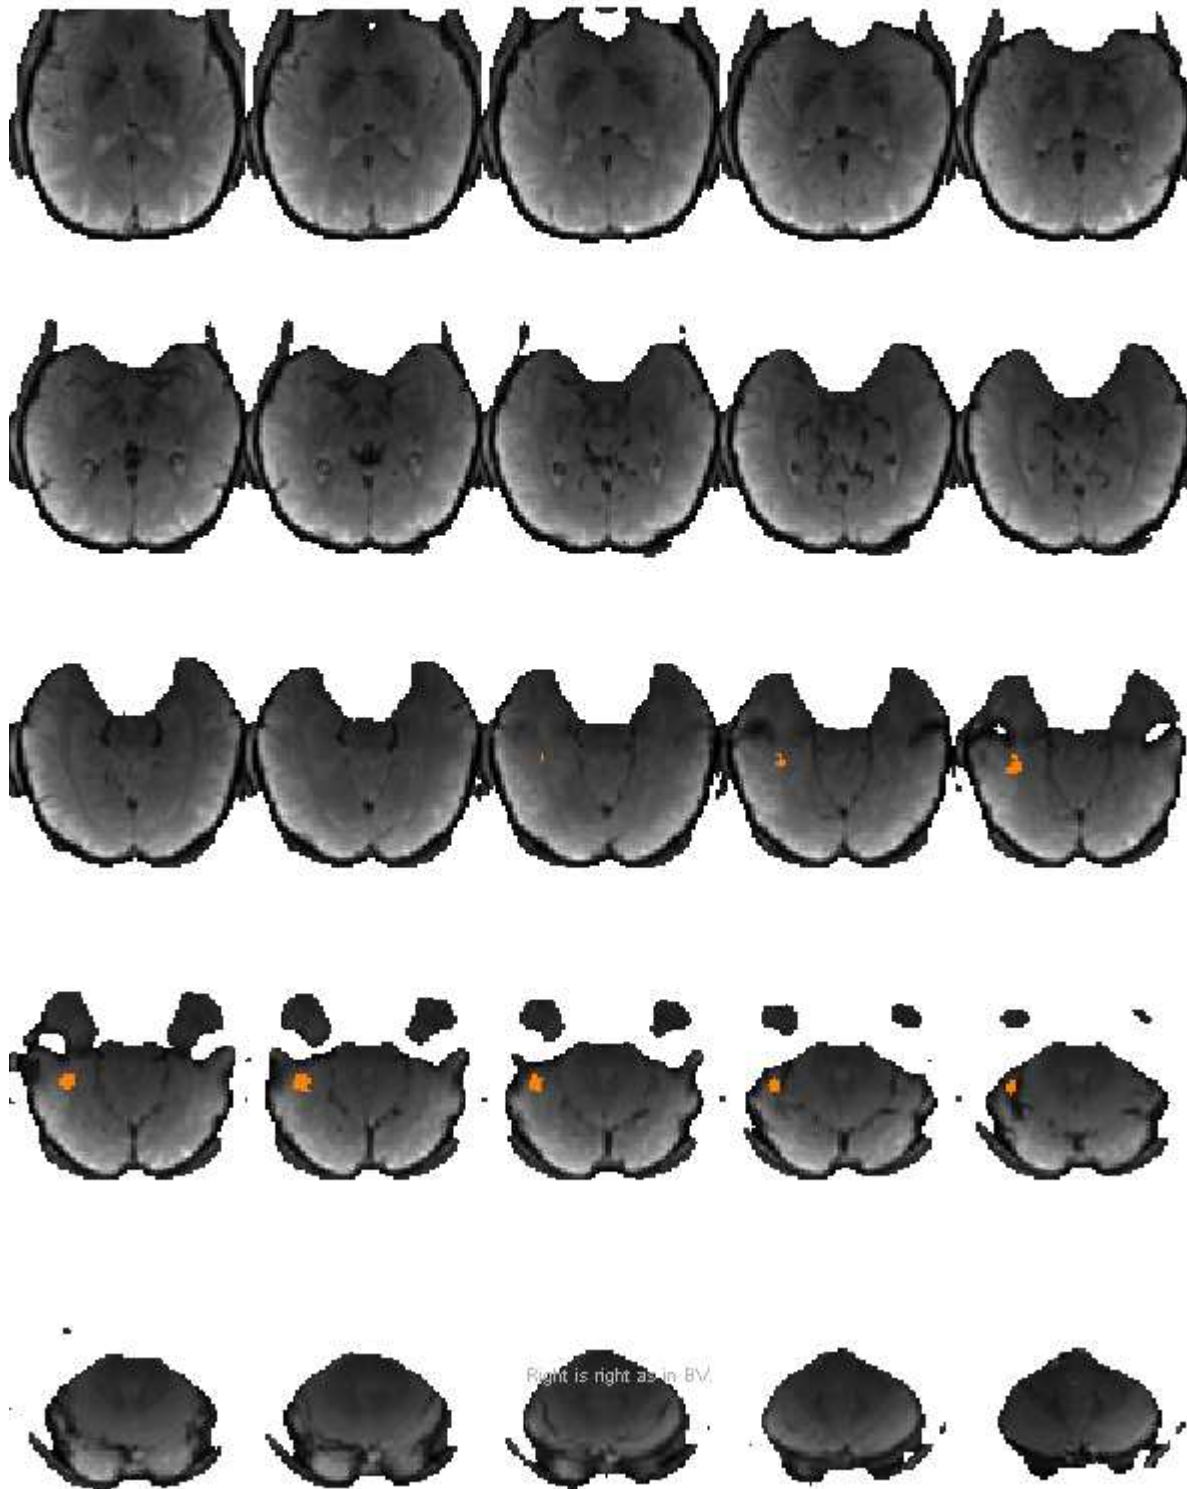

ROI1,2,4,4

subject 1  
session 2  
FFA<sub>L</sub>  
128 voxels

ROI for FFA<sub>L</sub> (128)

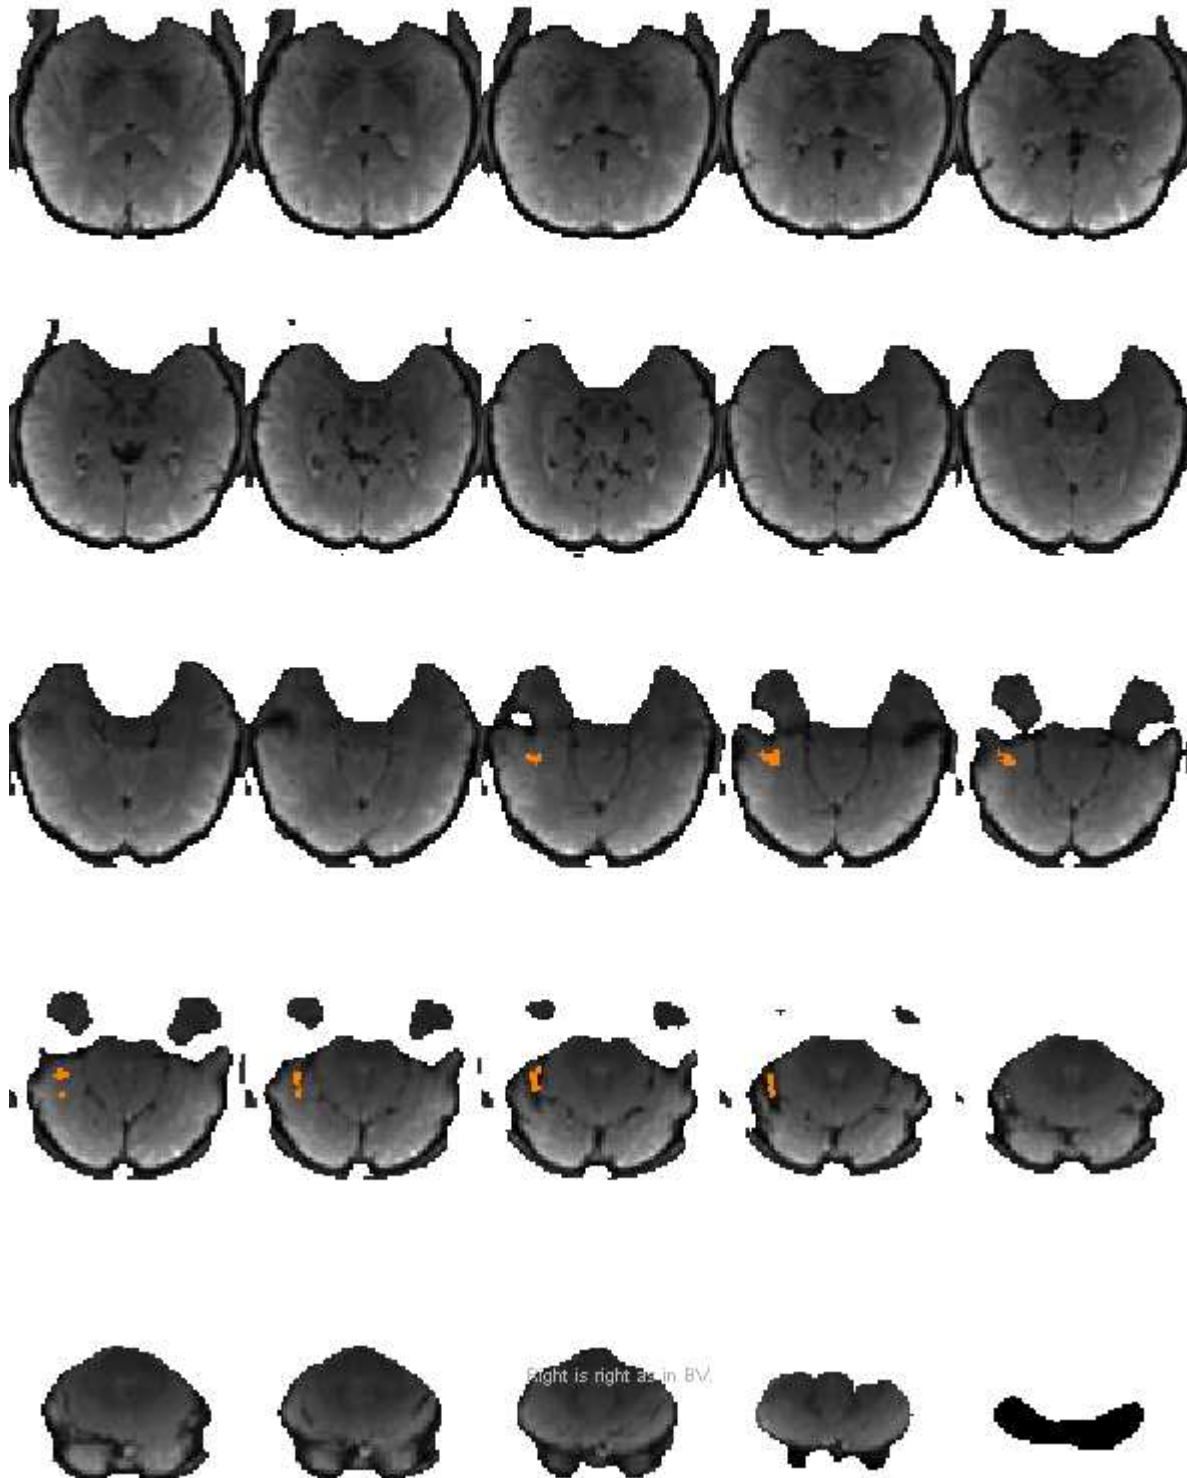



ROI for FFA<sub>L</sub> (128)

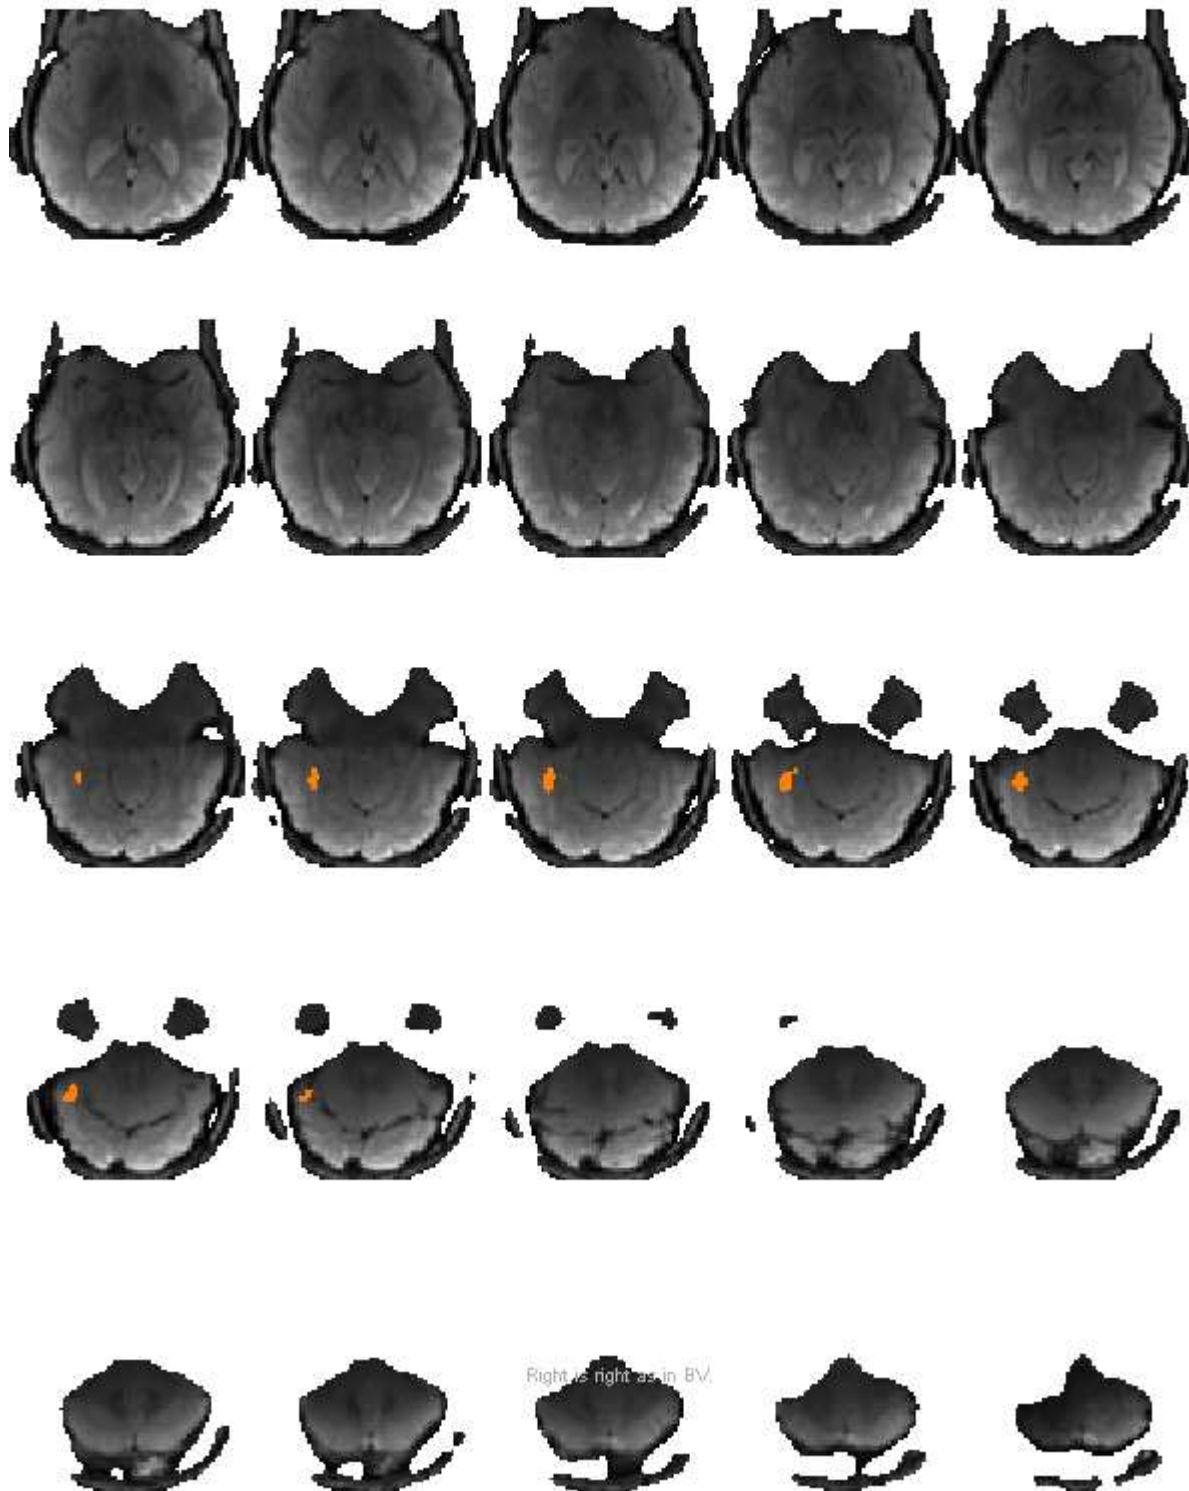

ROI for FFA<sub>L</sub> (128)

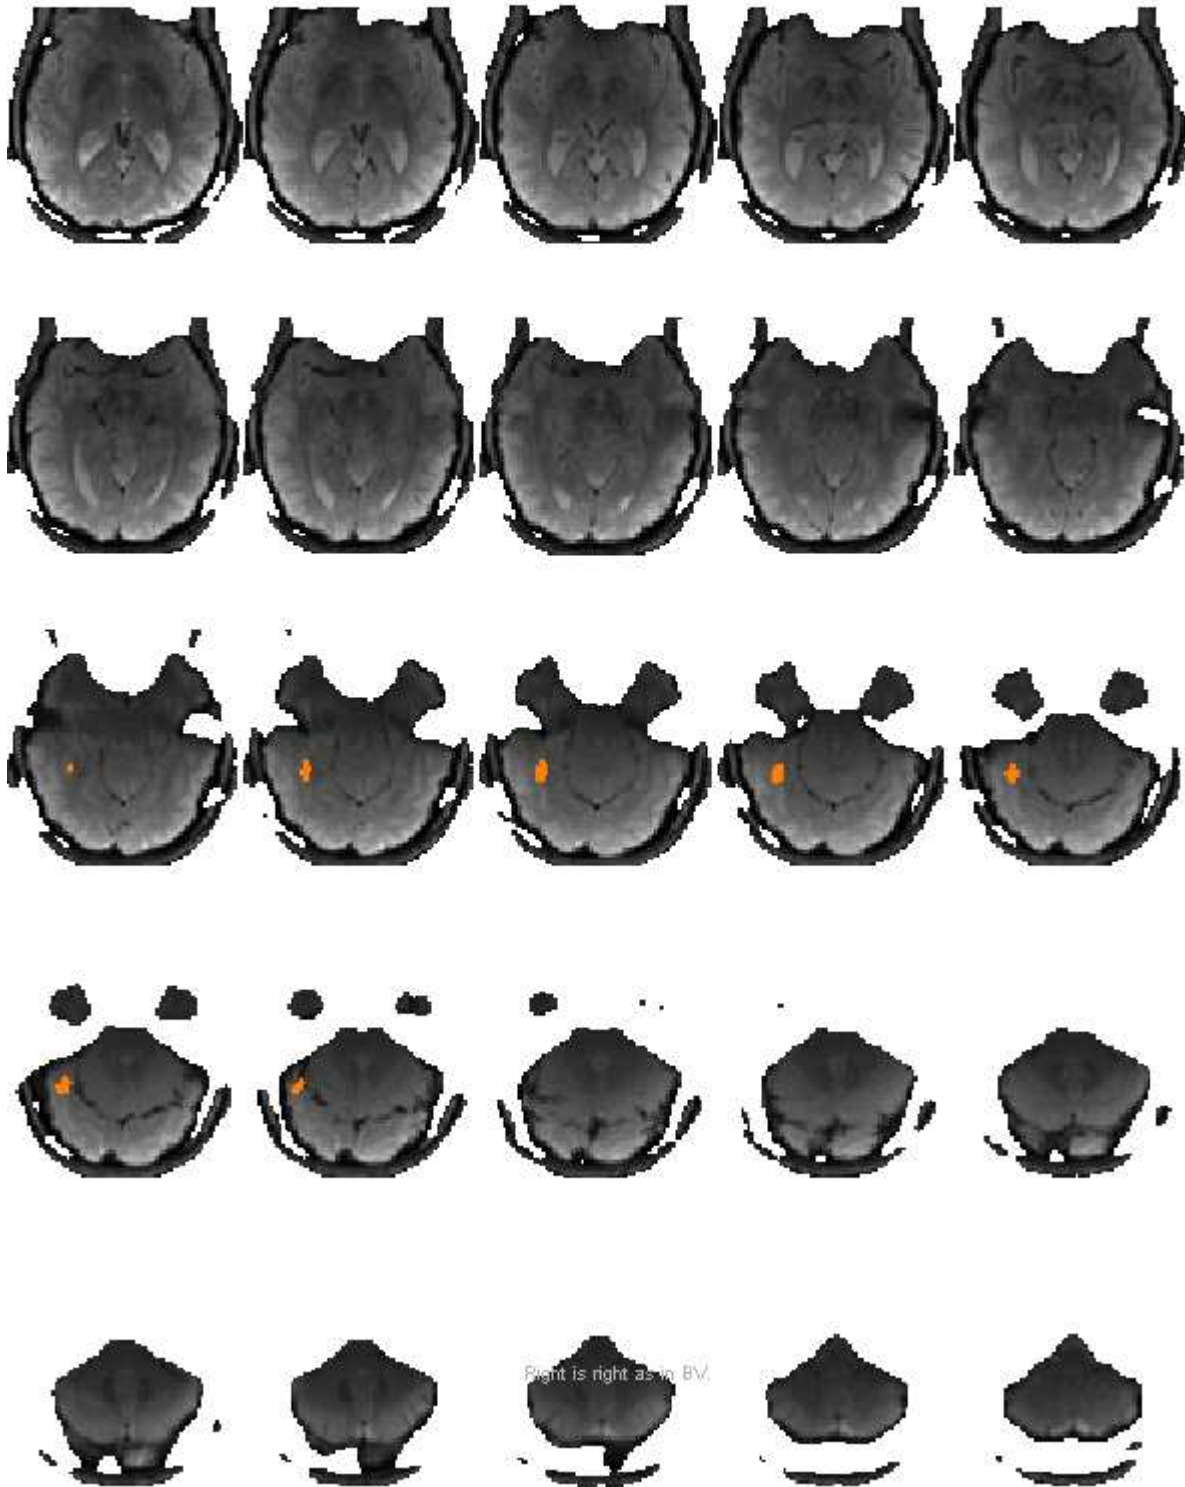

ROI for FFA<sub>L</sub> (128)

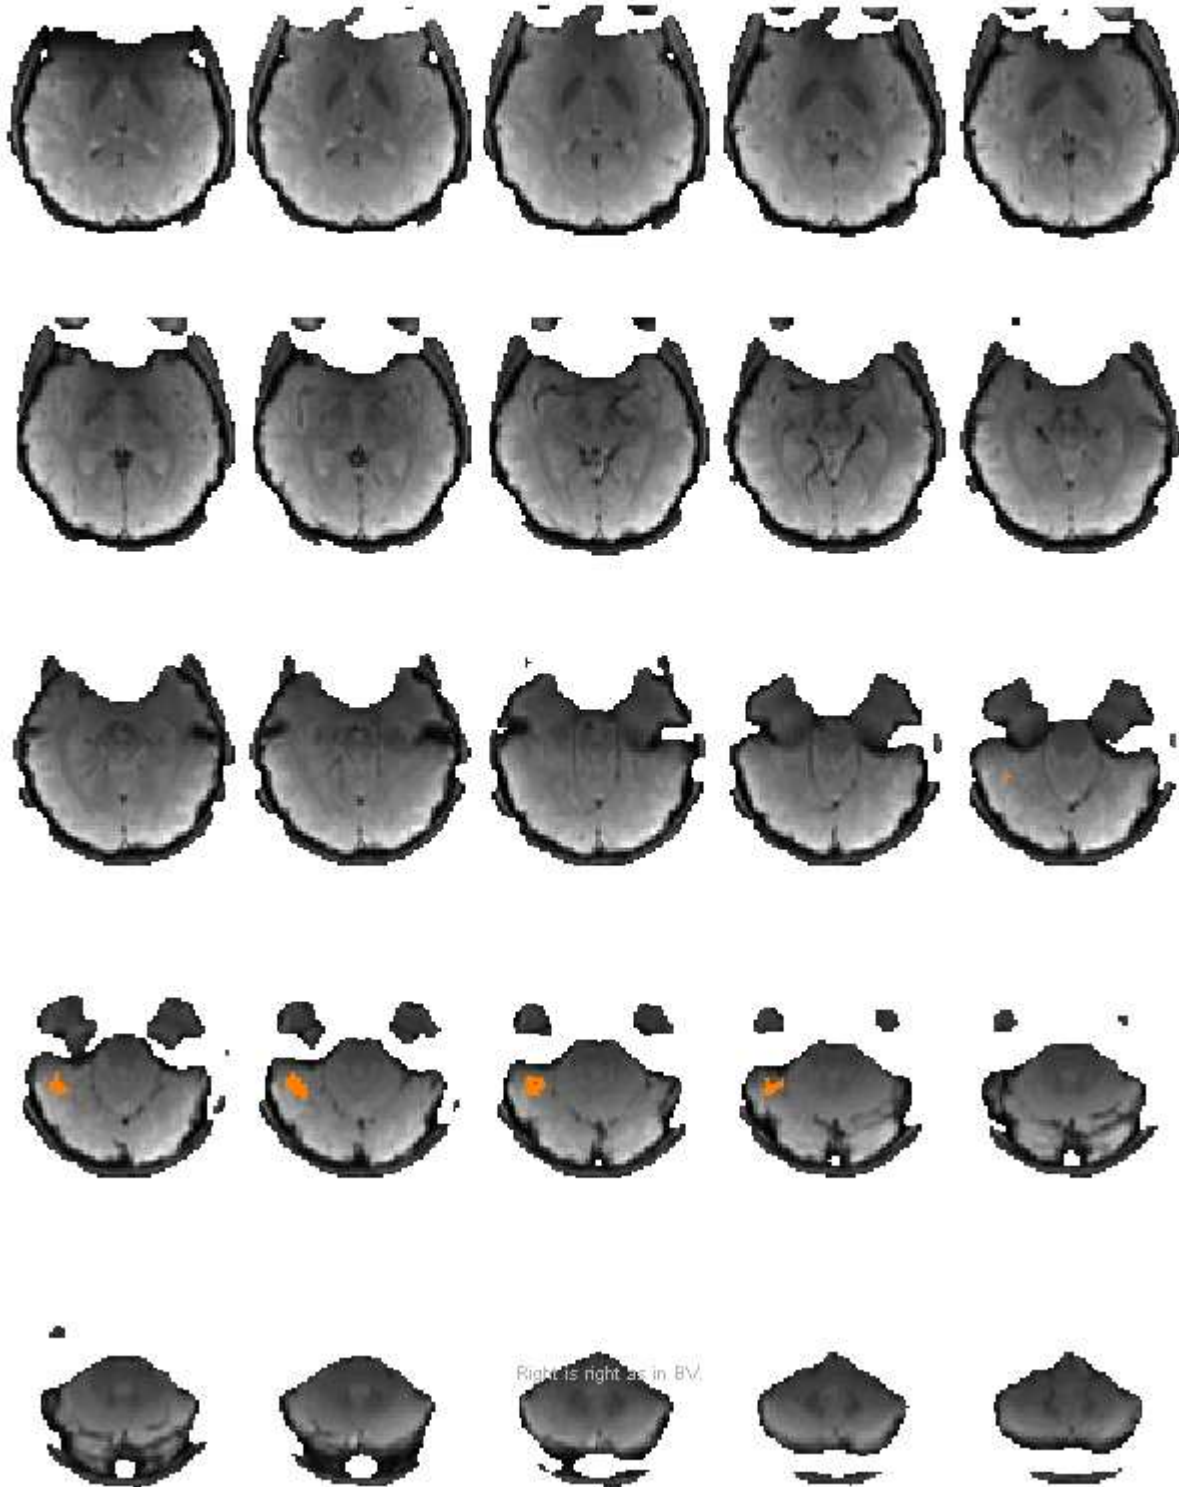

ROI for FFA<sub>L</sub> (128)

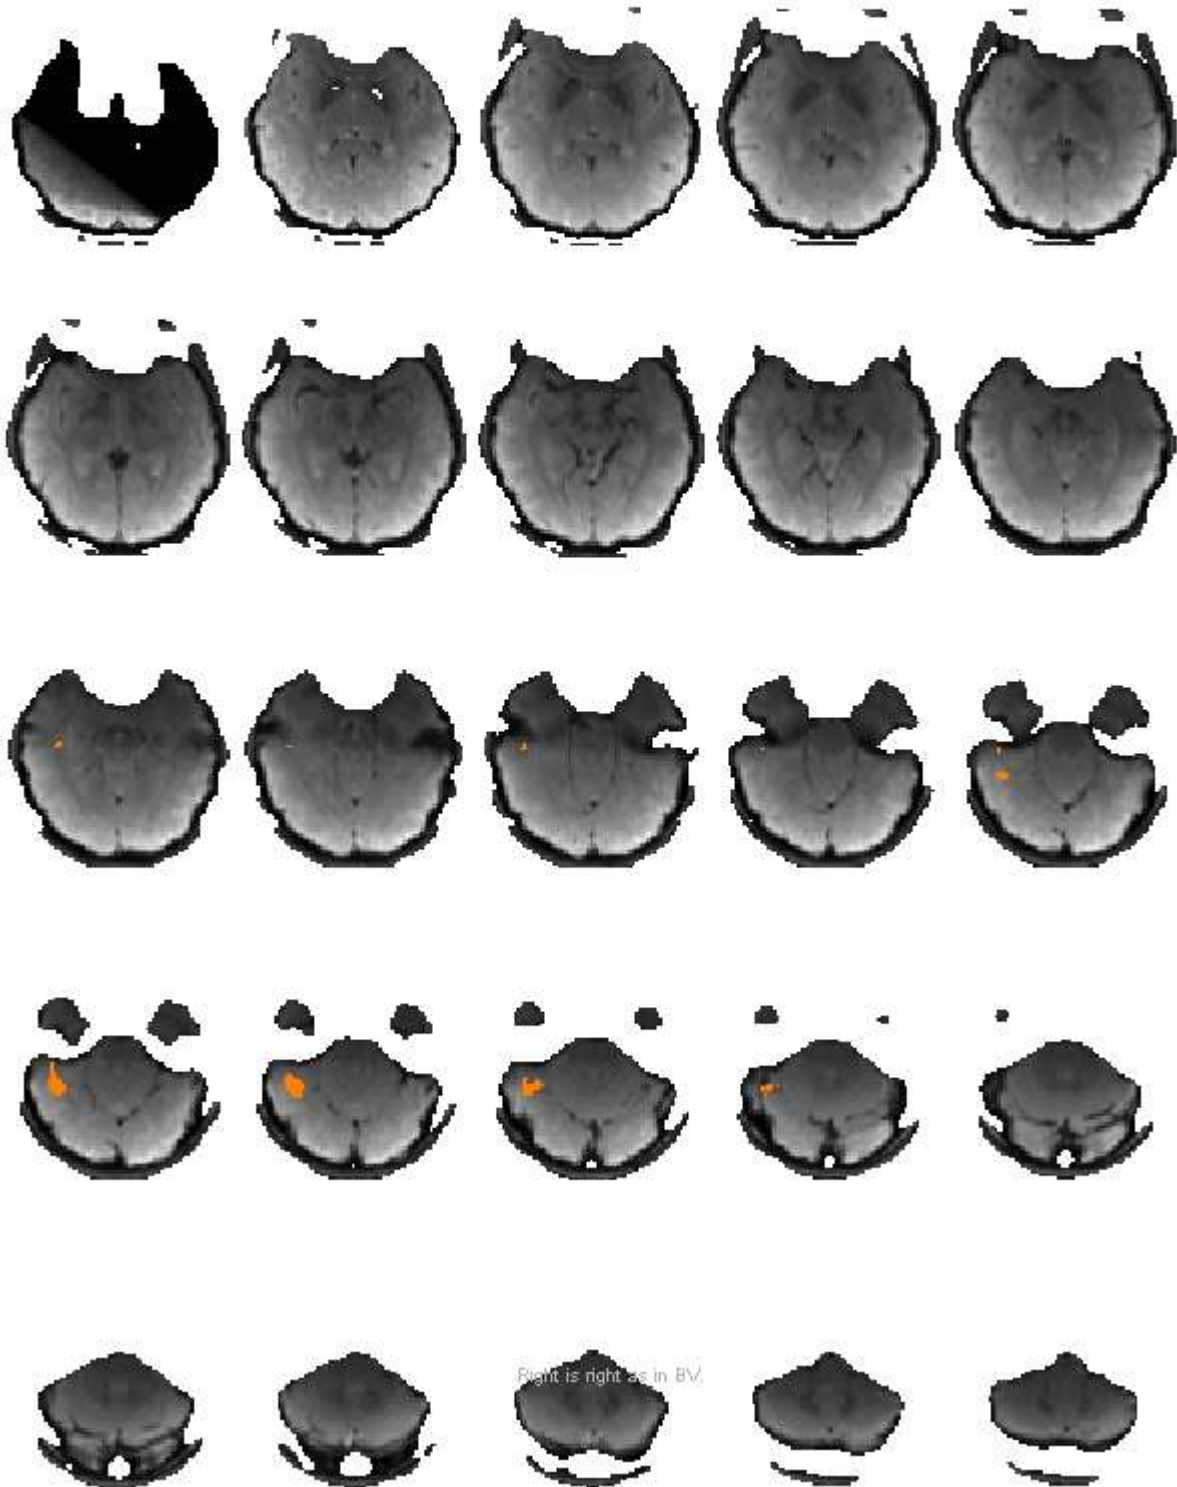



ROI for FFA<sub>L</sub> (128)

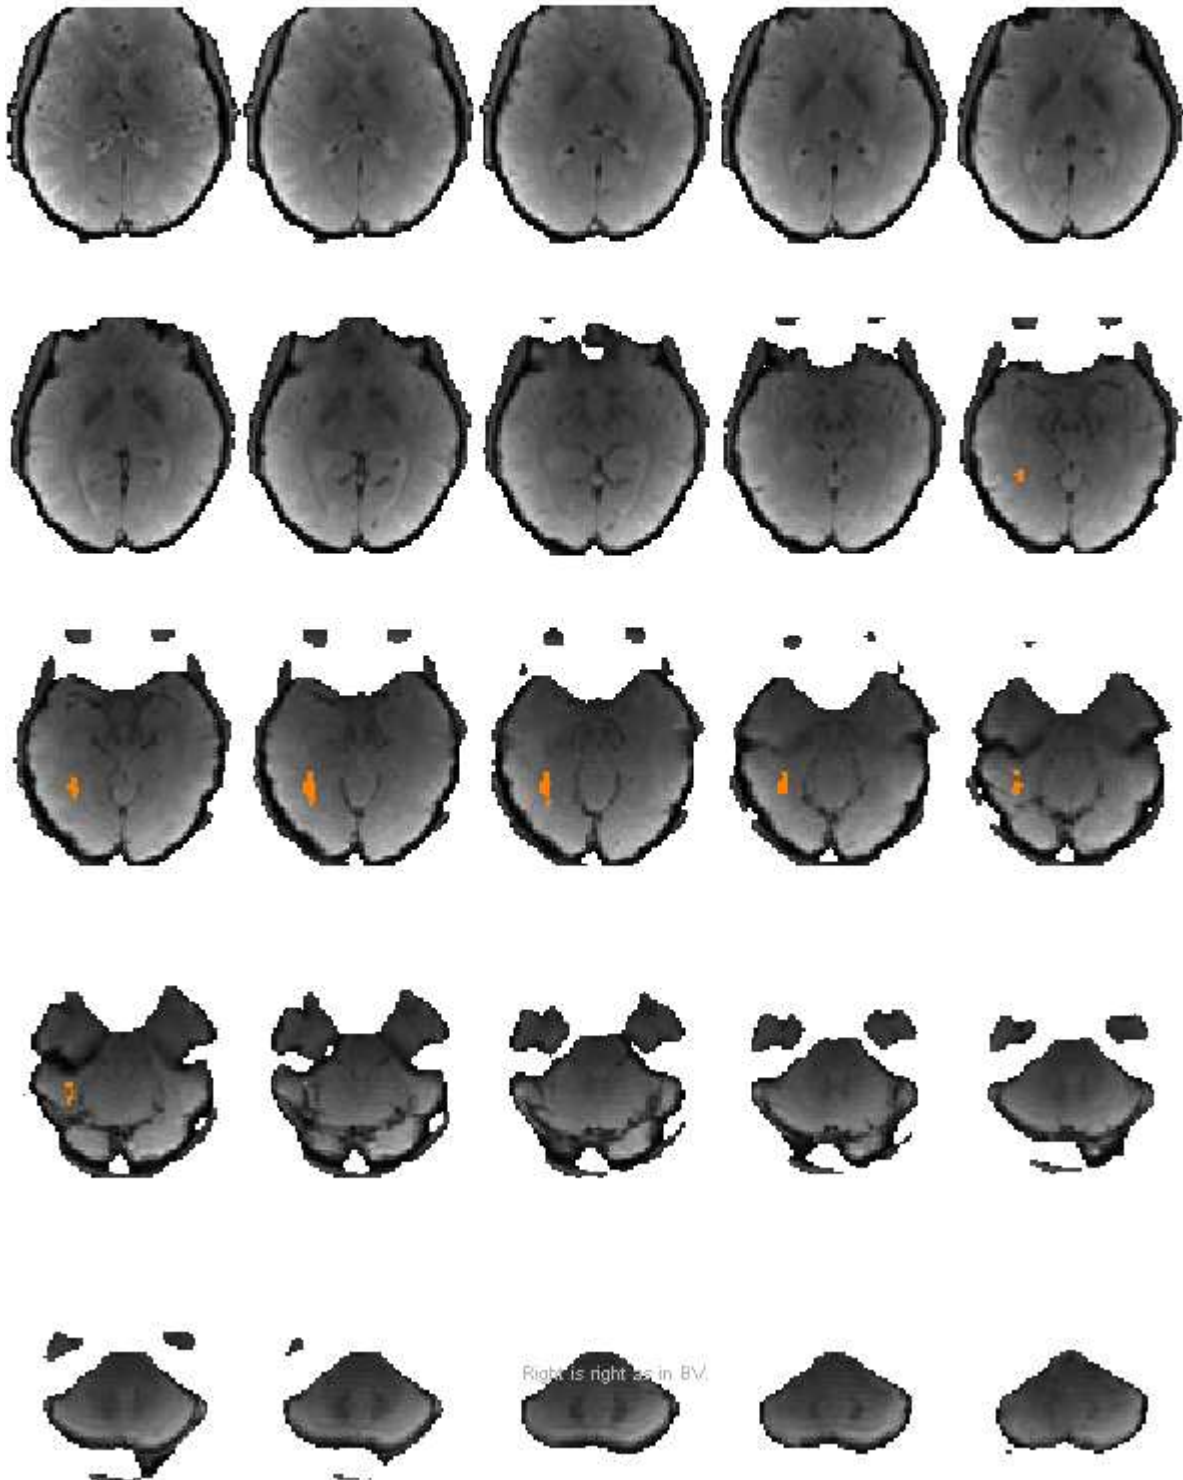

ROI for FFA<sub>L</sub> (128)

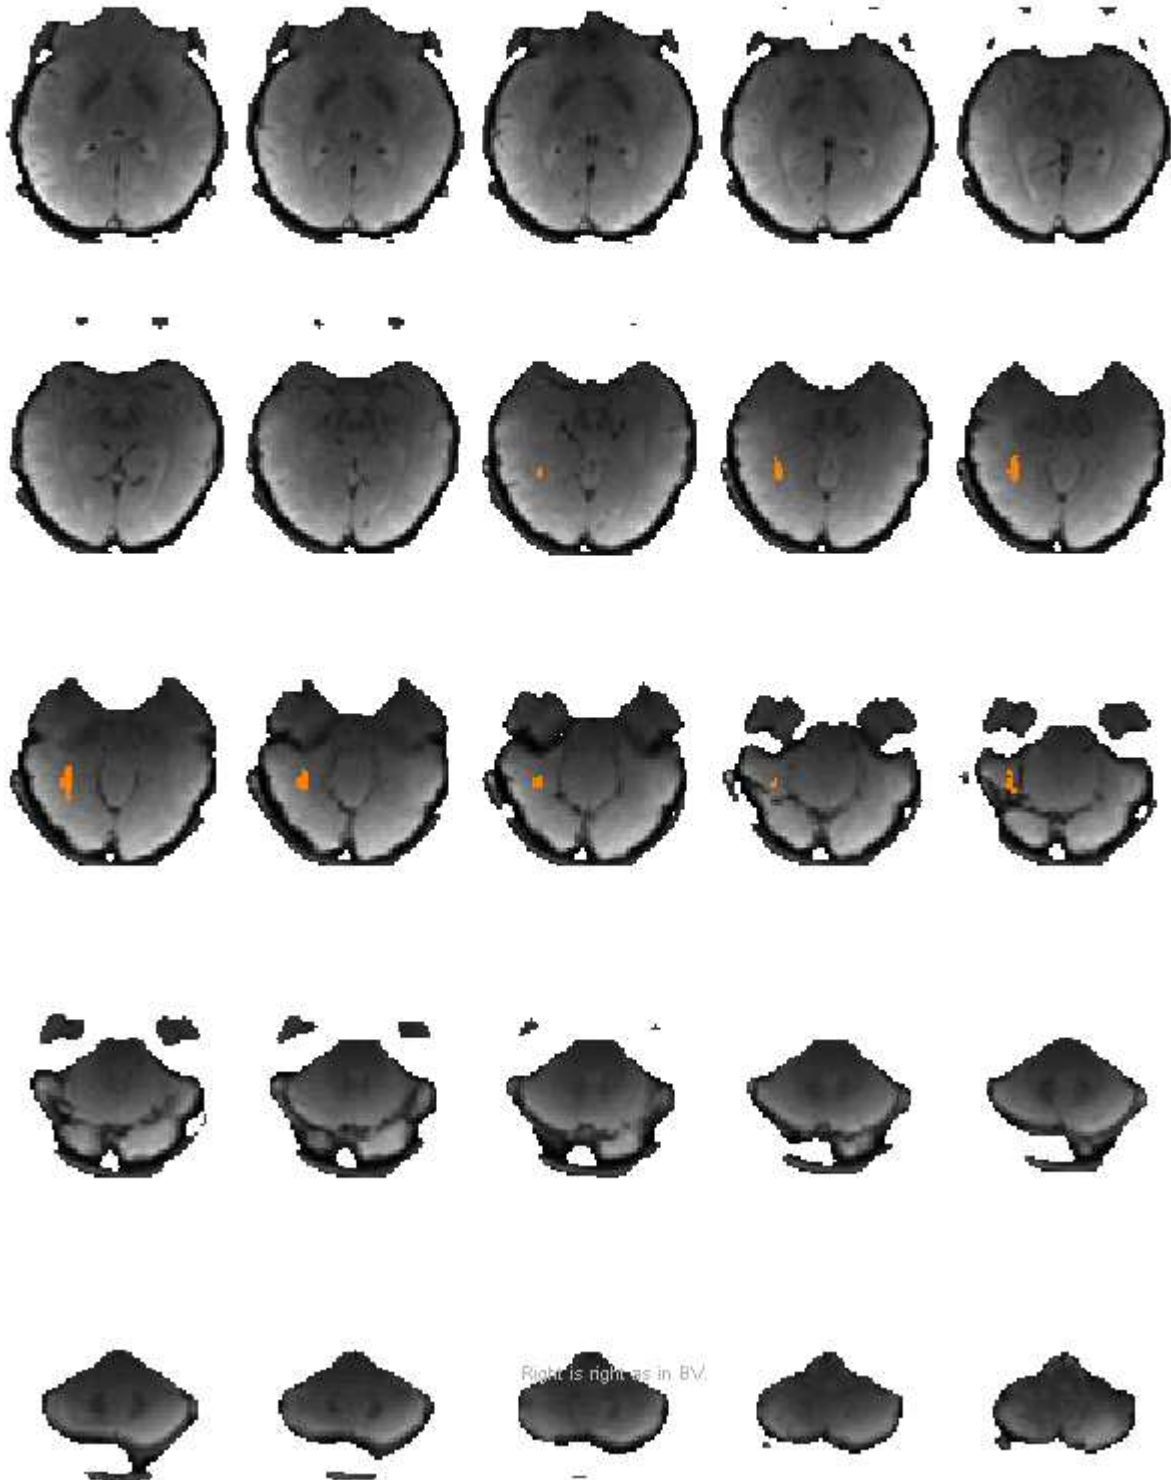

ROI for FFA<sub>R</sub> (128)

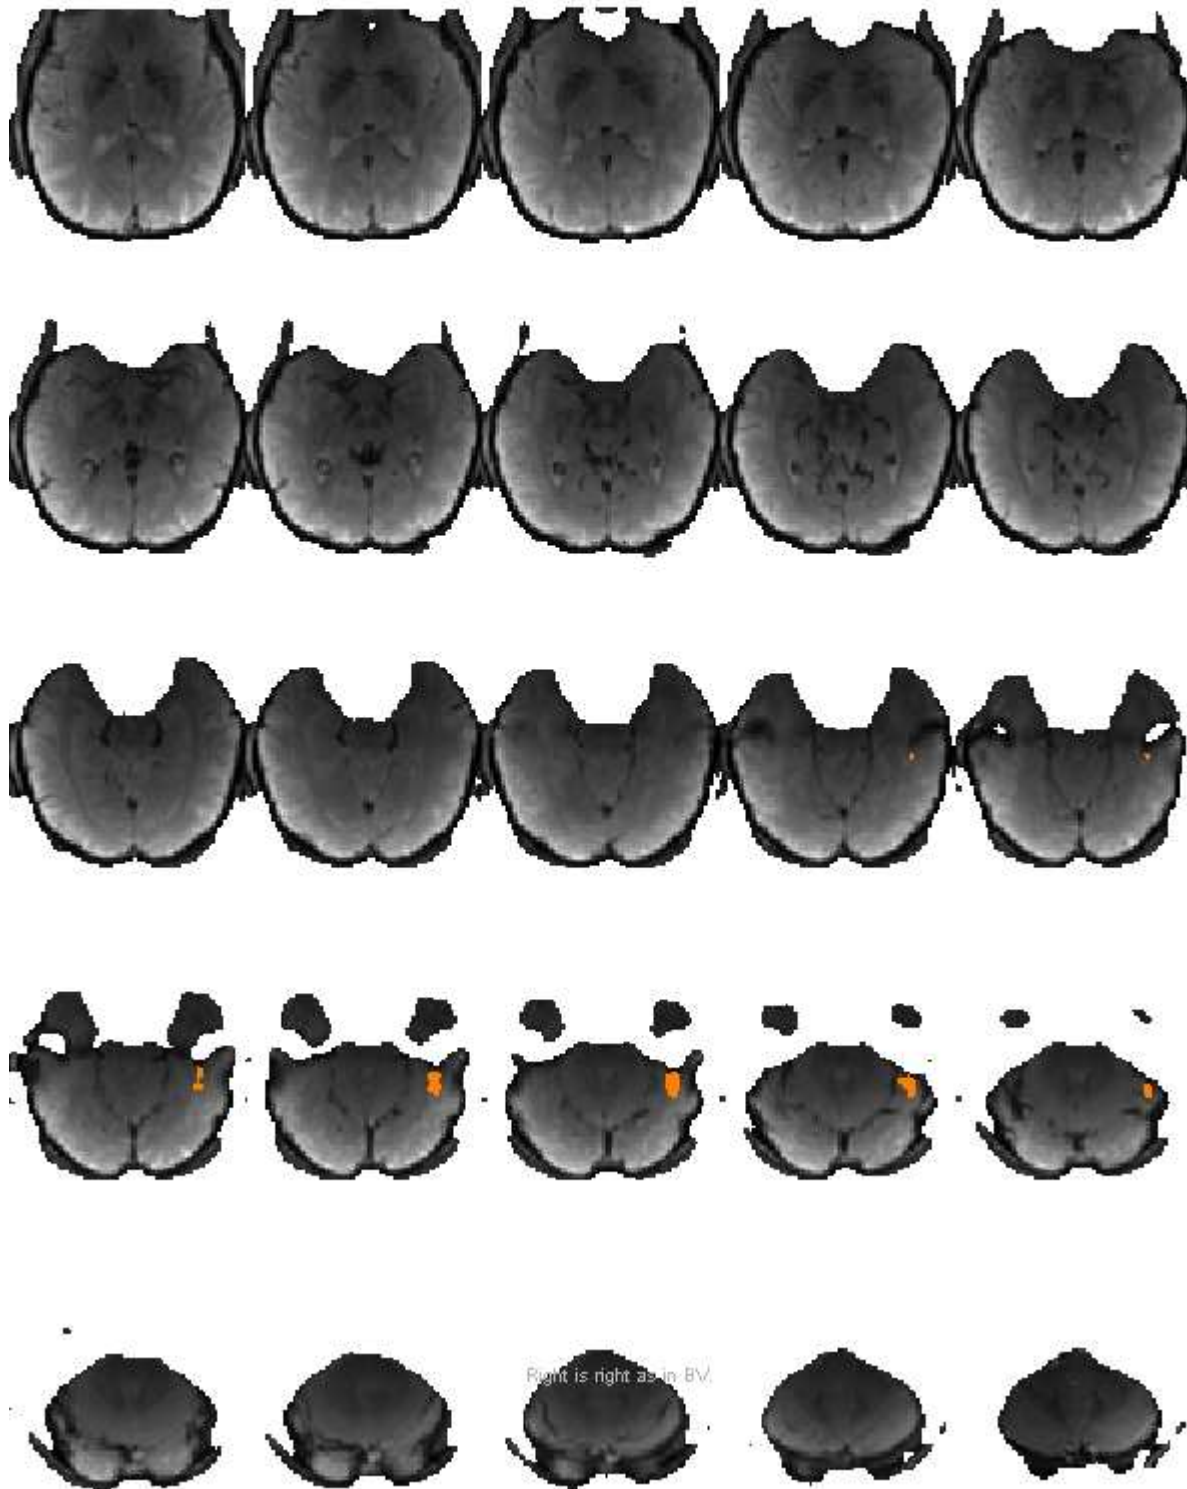

ROI1,2,5,4

subject 1  
session 2  
FFA<sub>R</sub>  
128 voxels

ROI for FFA<sub>R</sub> (128)

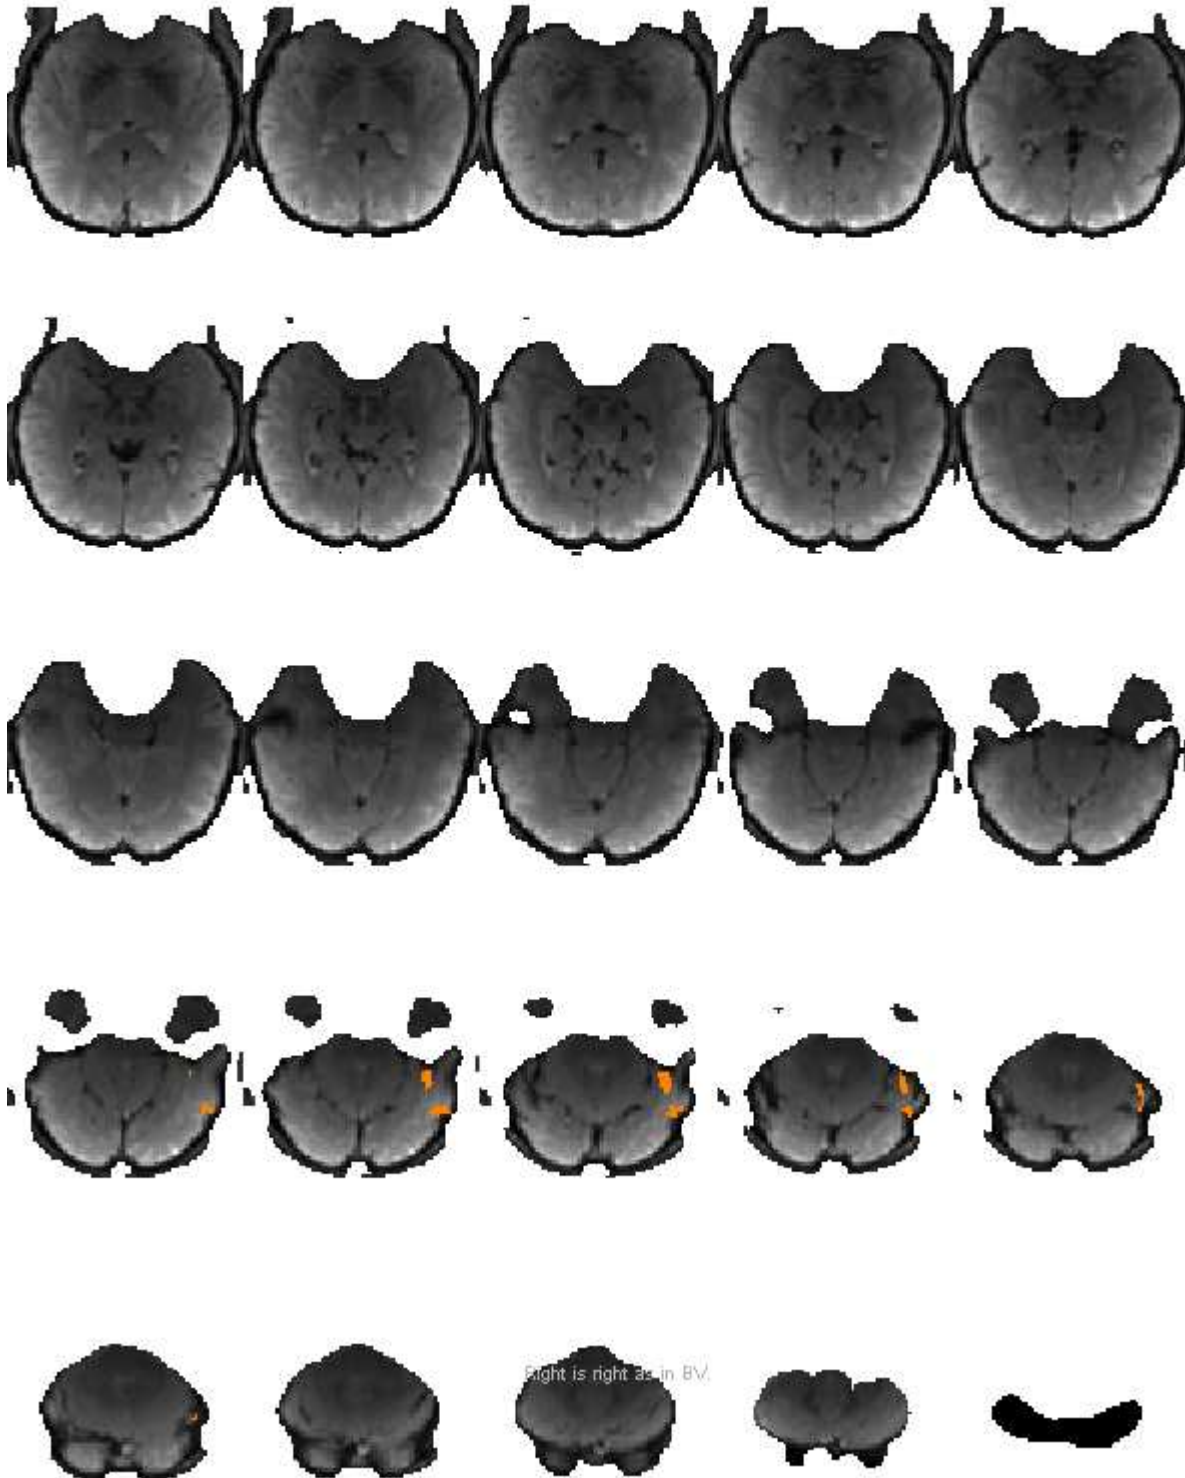



ROI for FFA<sub>R</sub> (128)

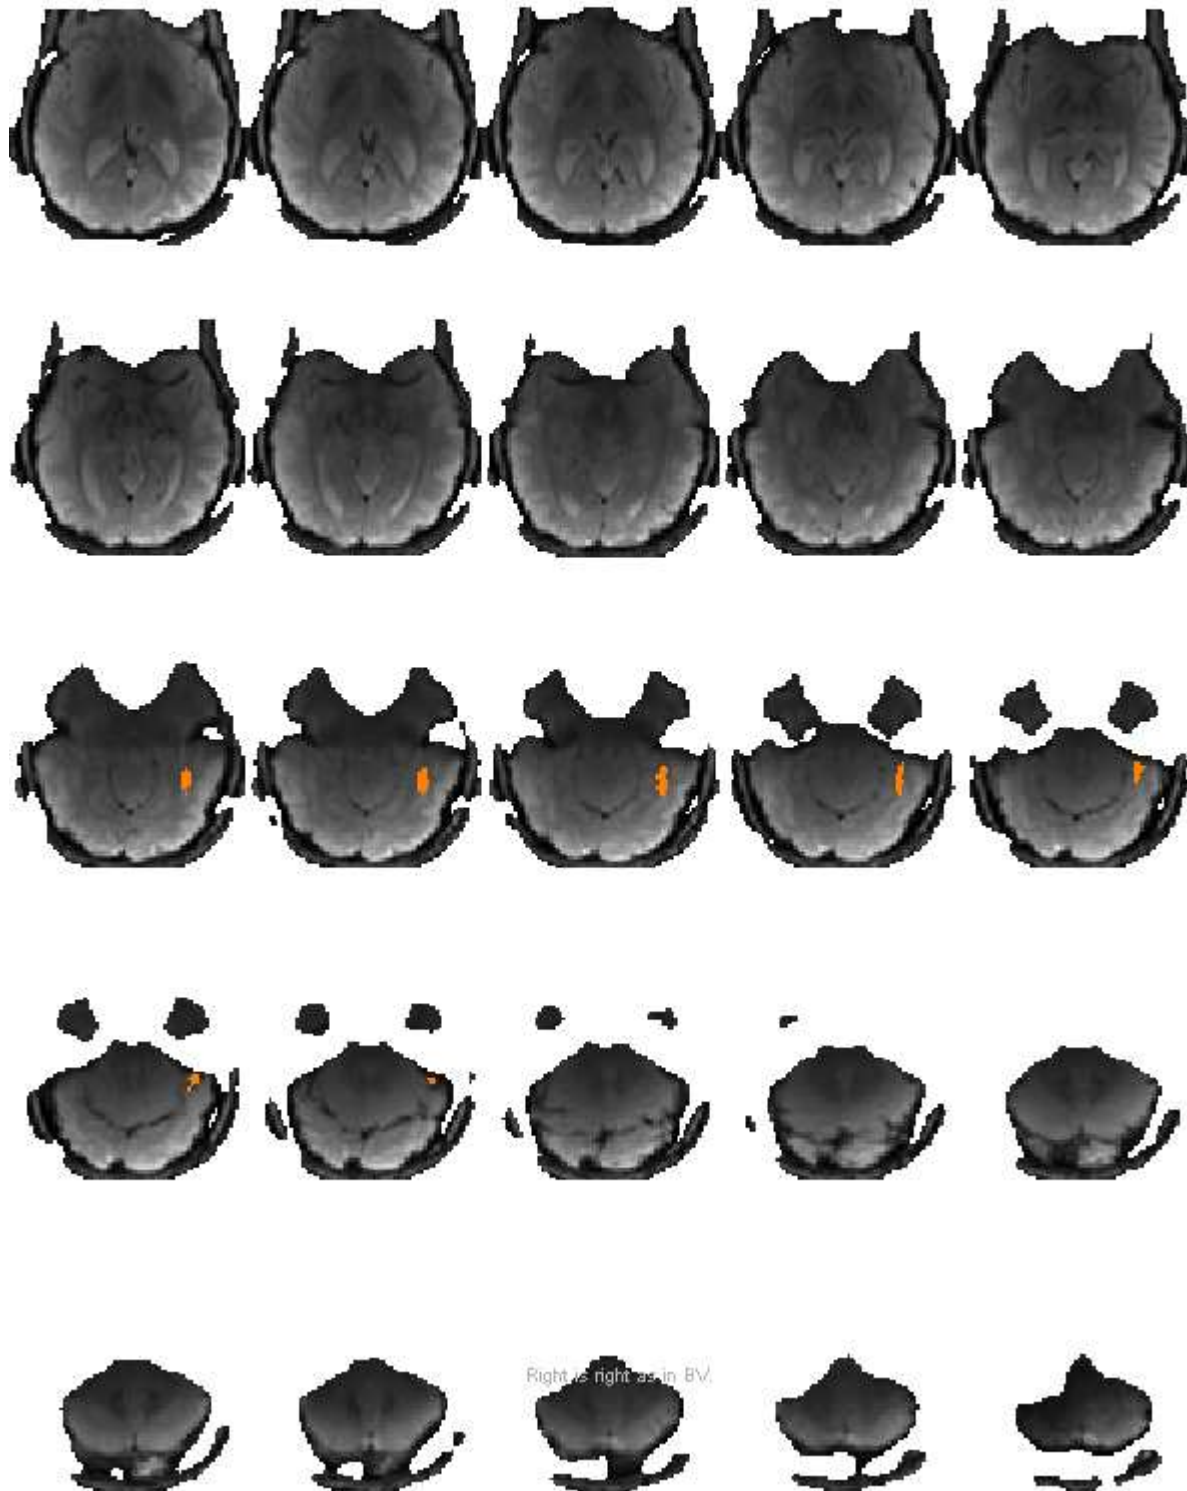

ROI for FFA<sub>R</sub> (128)

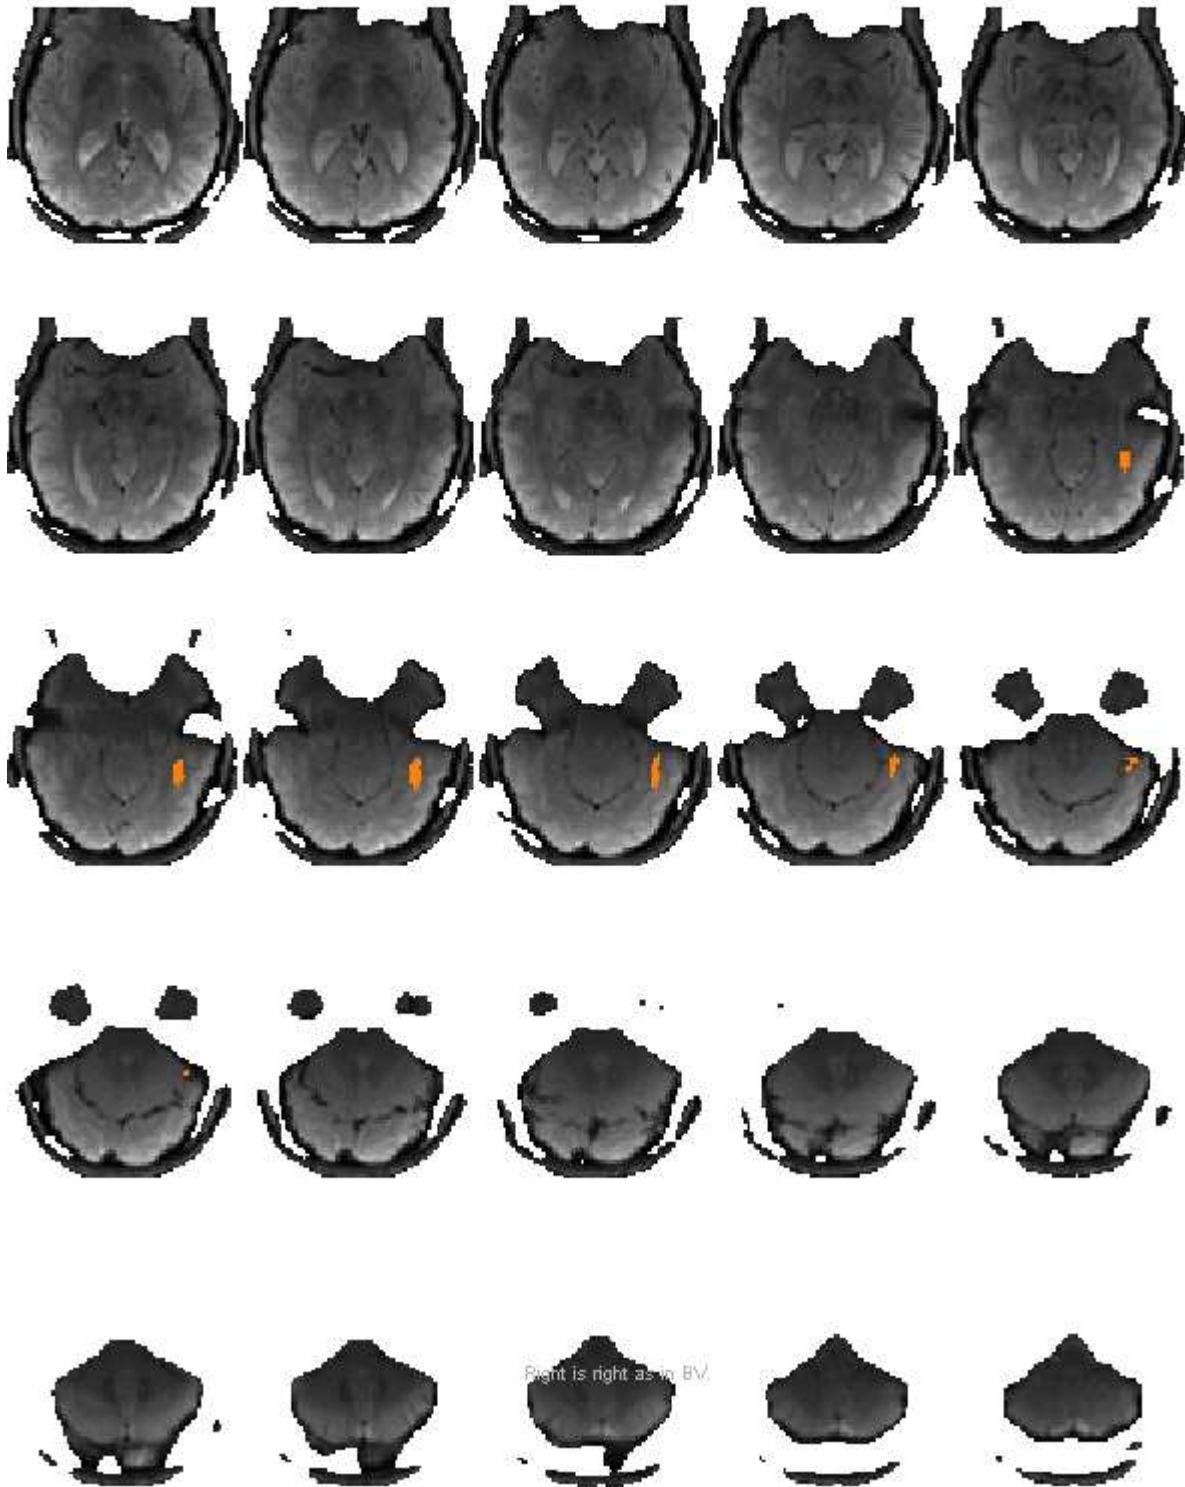

ROI for FFA<sub>R</sub> (128)

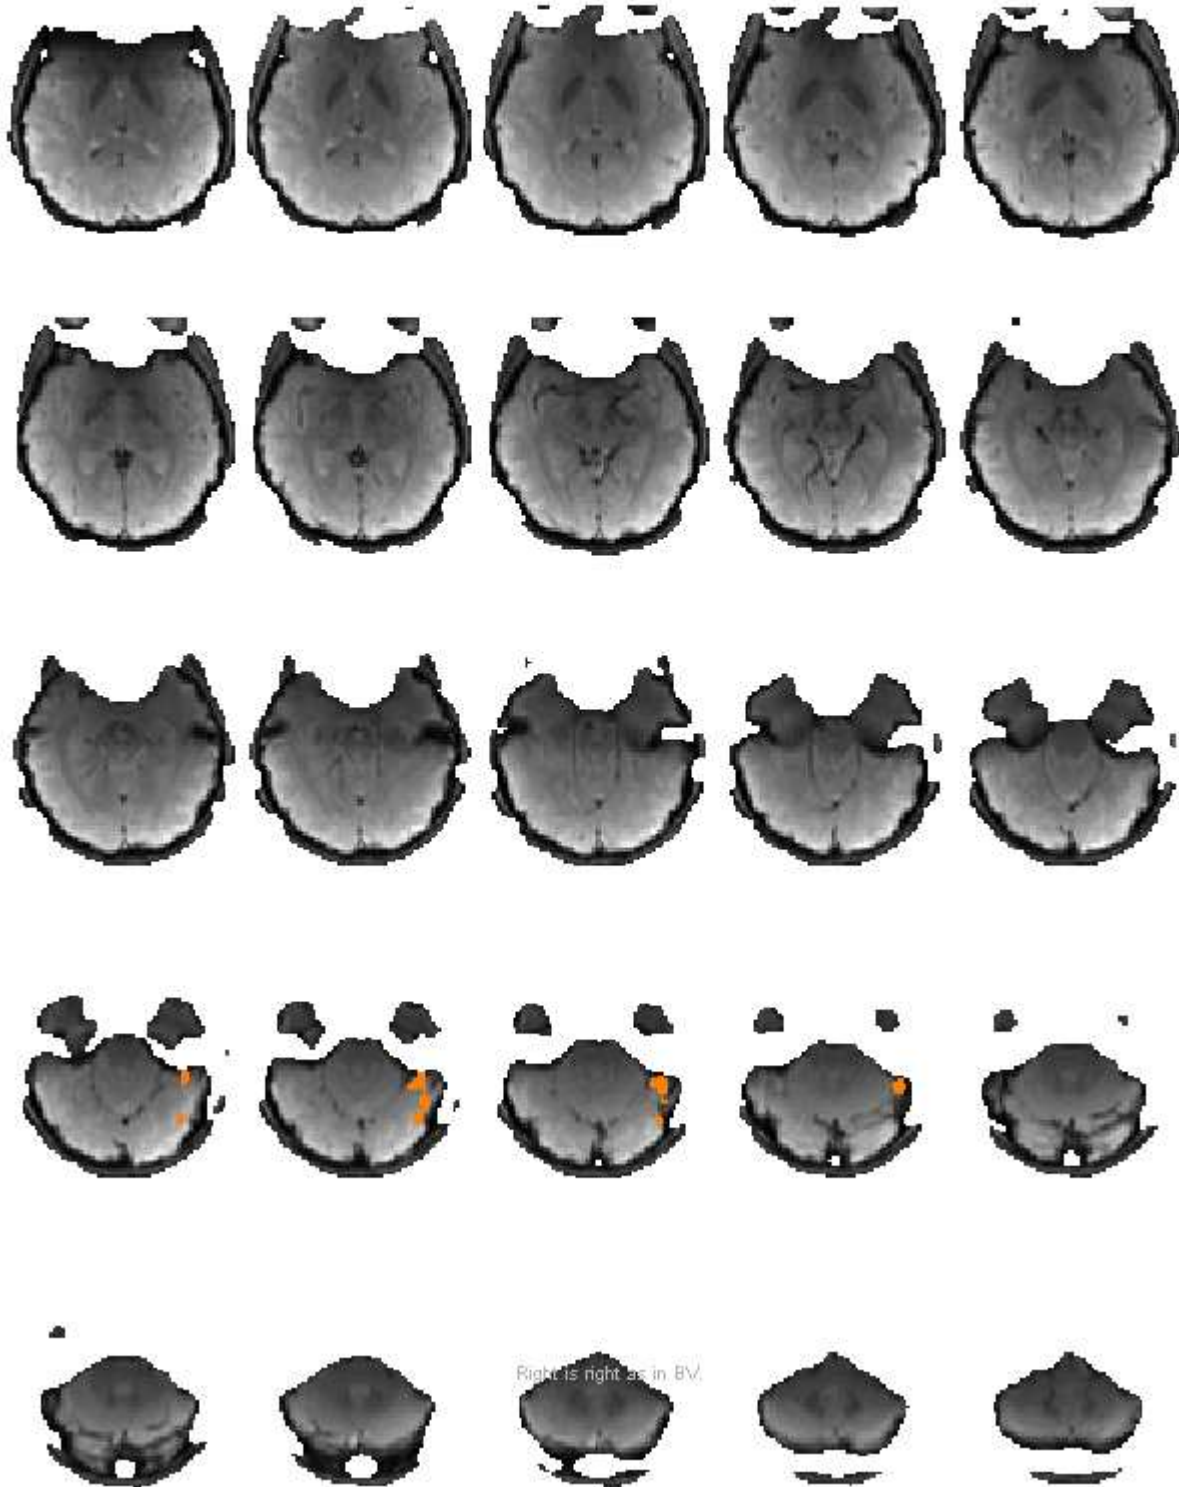

ROI for FFA<sub>R</sub> (128)

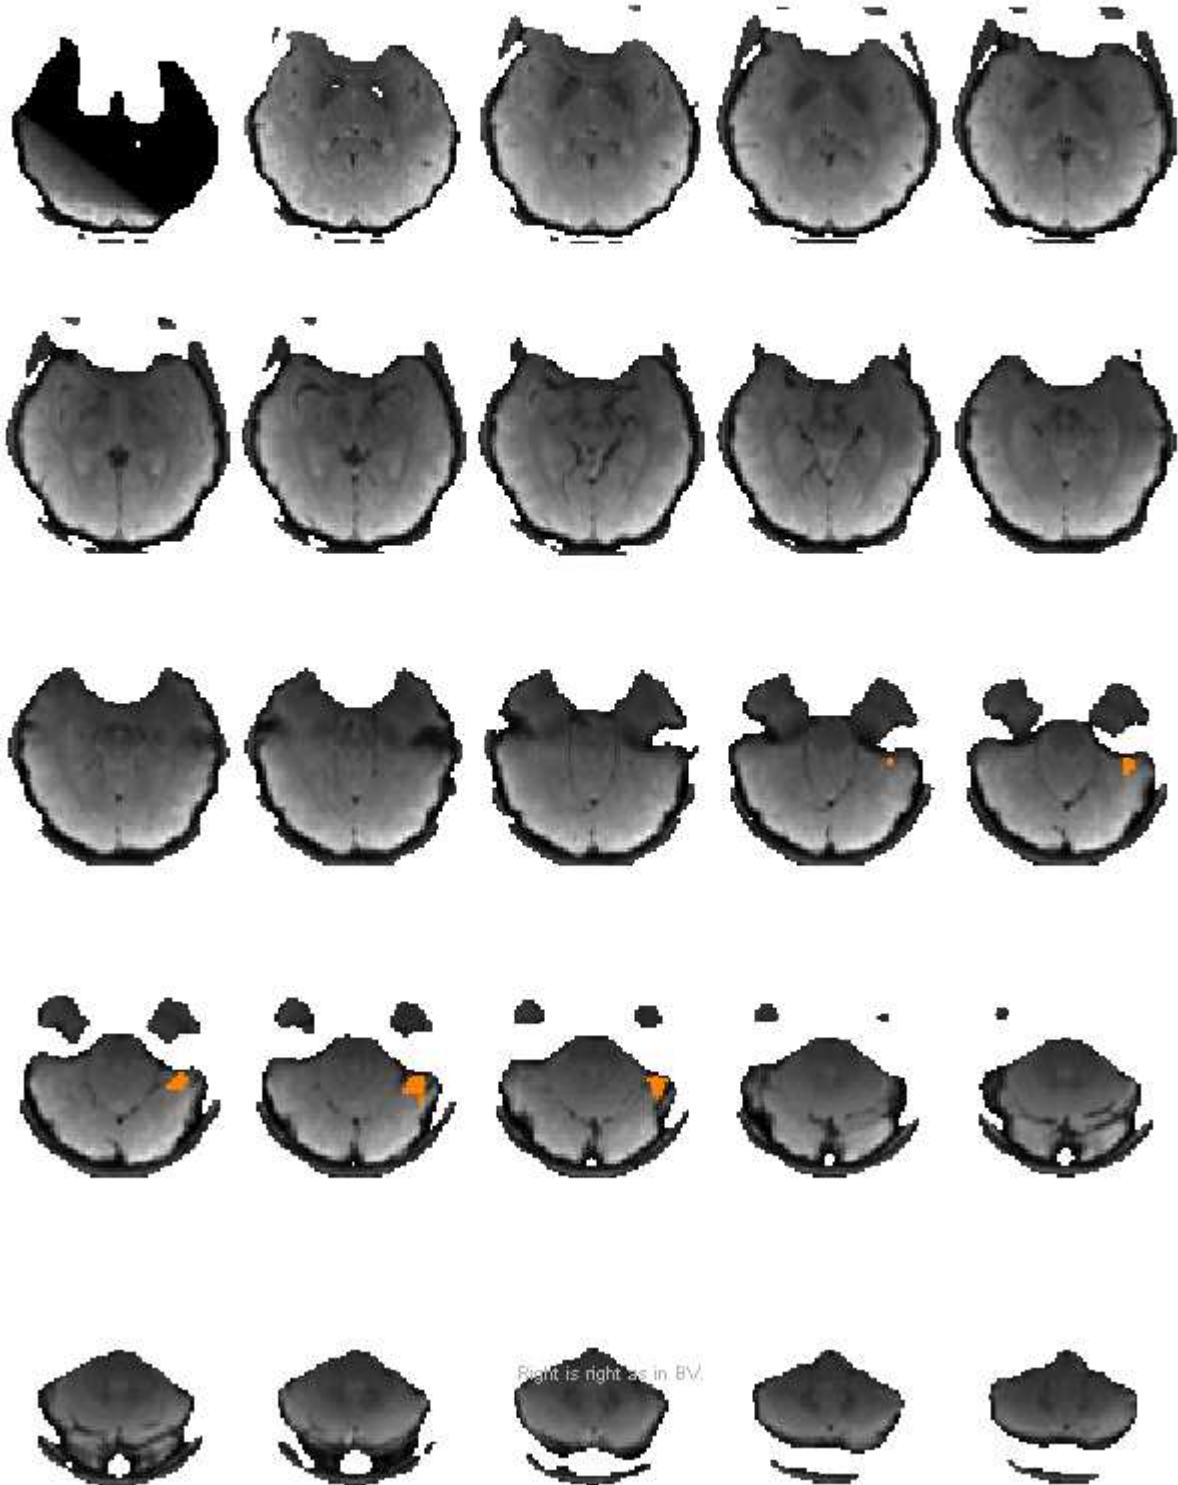



ROI for FFA<sub>R</sub> (128)

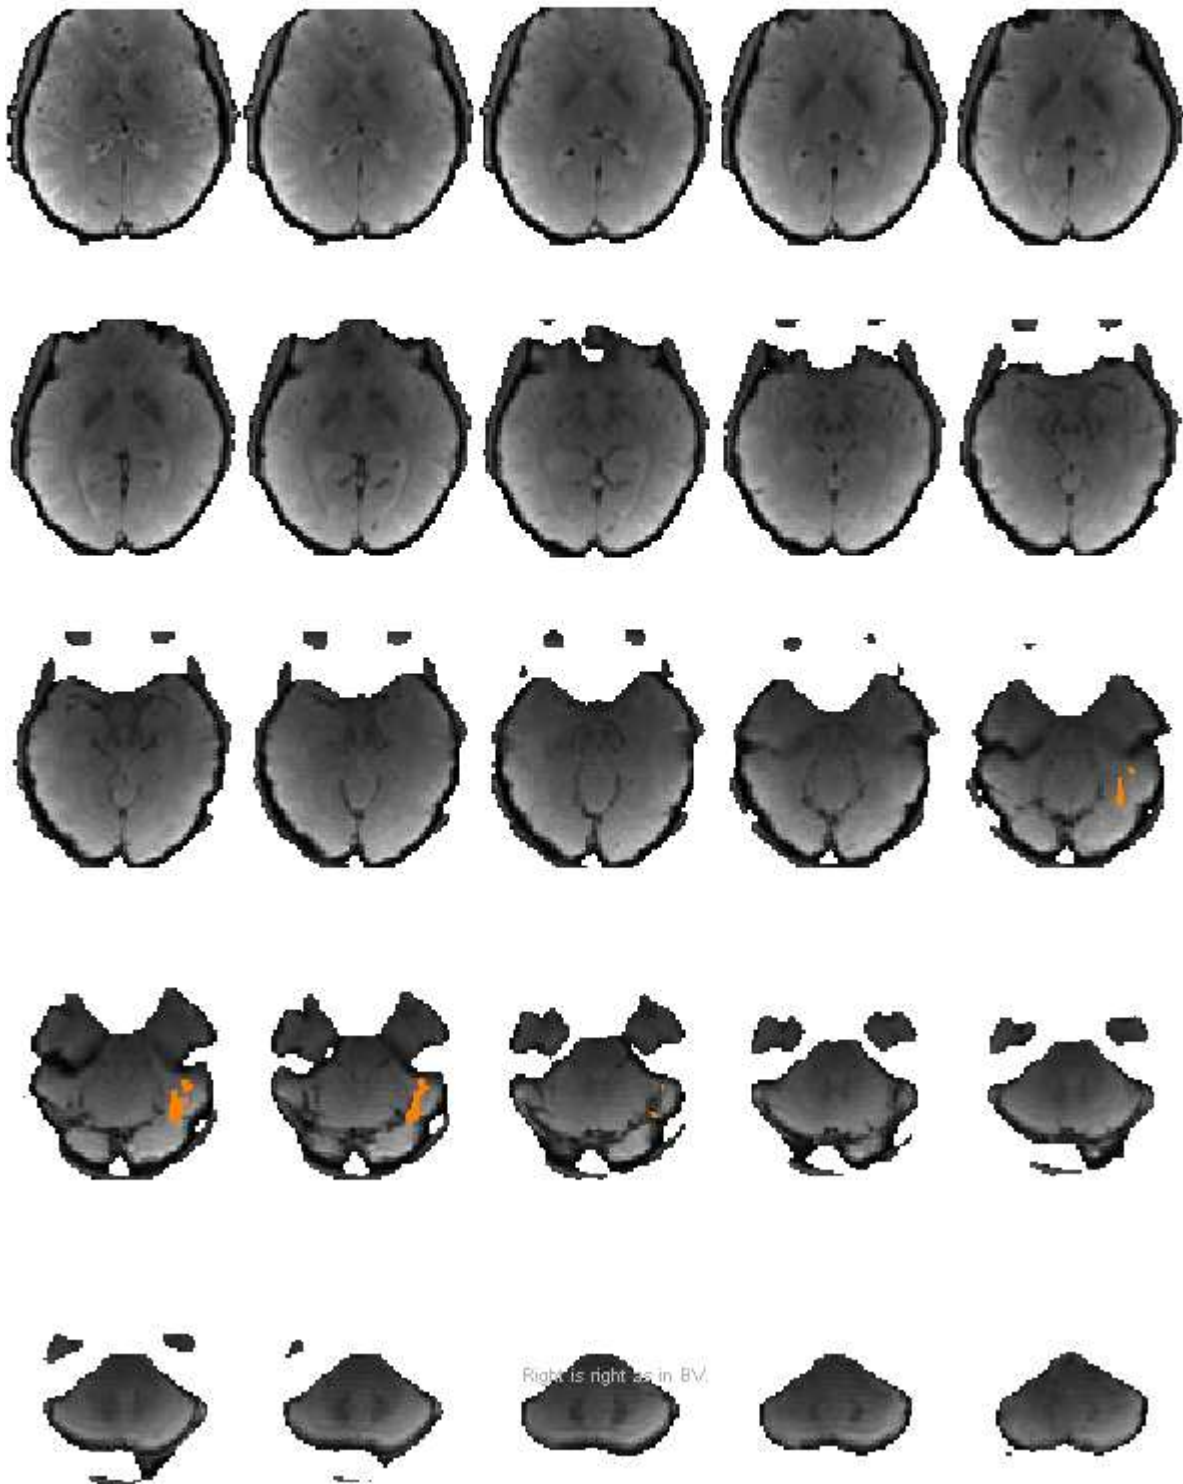

ROI for FFA<sub>R</sub> (128)

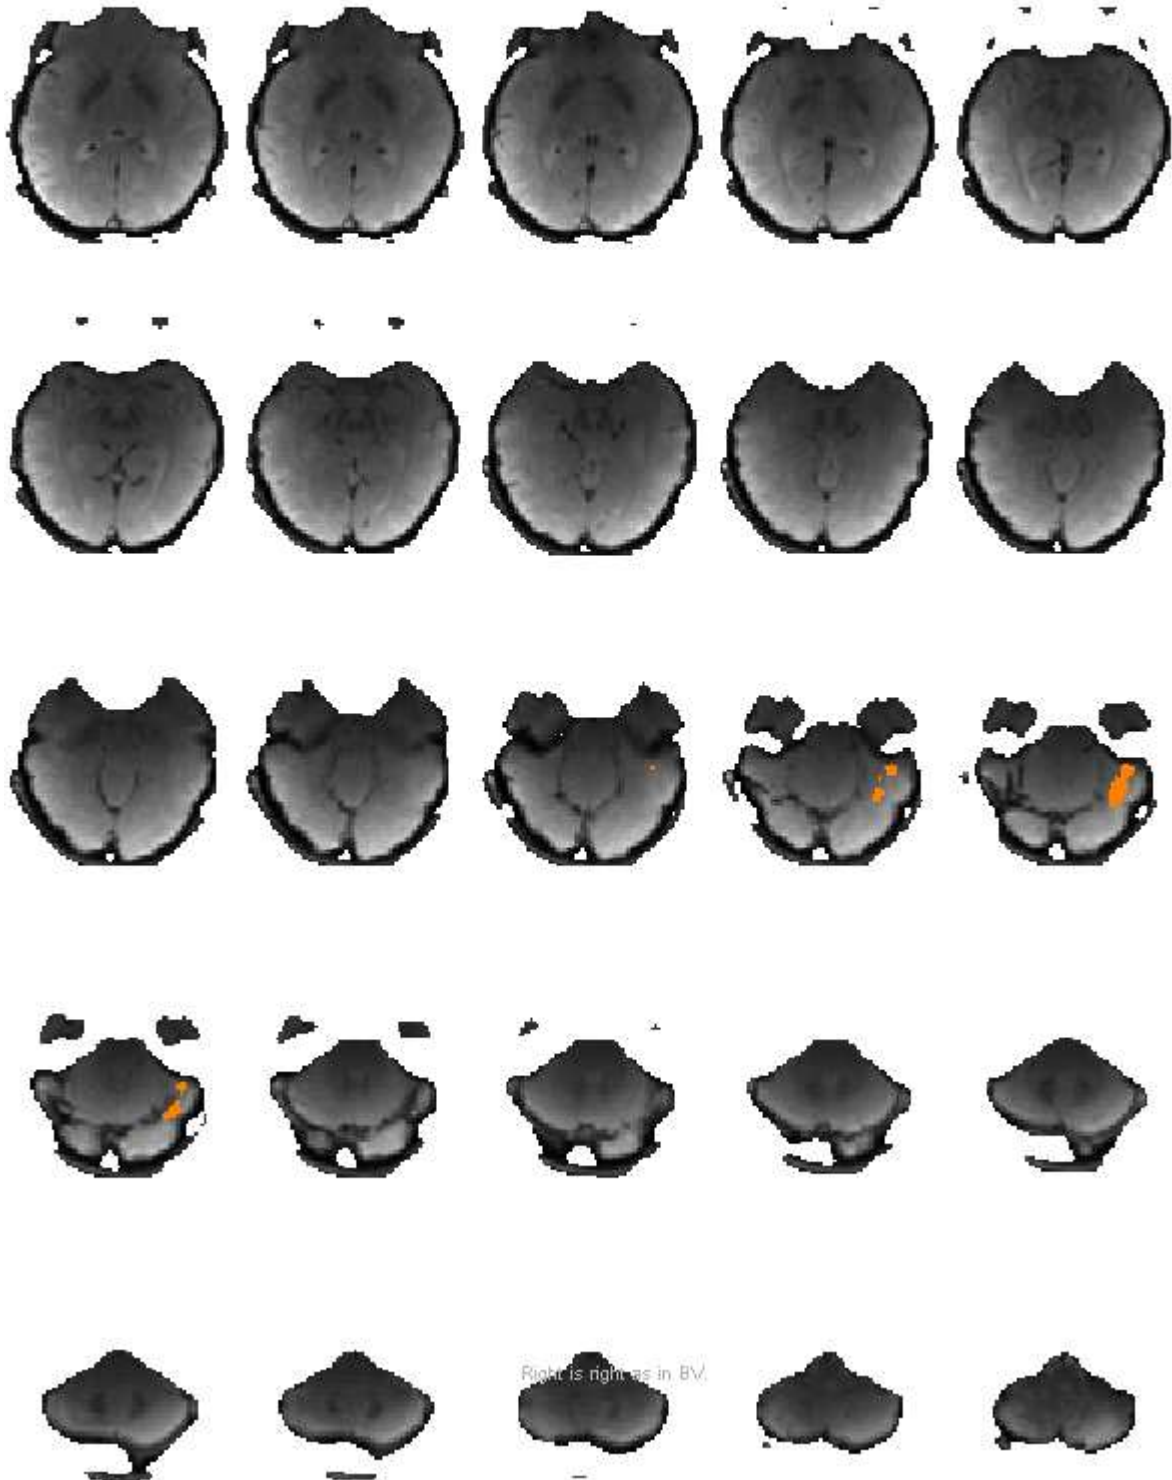

ROI,1,6,4

subject 1

session 1

PPA<sub>L</sub>

128 voxels

ROI for PPA<sub>L</sub> (128)

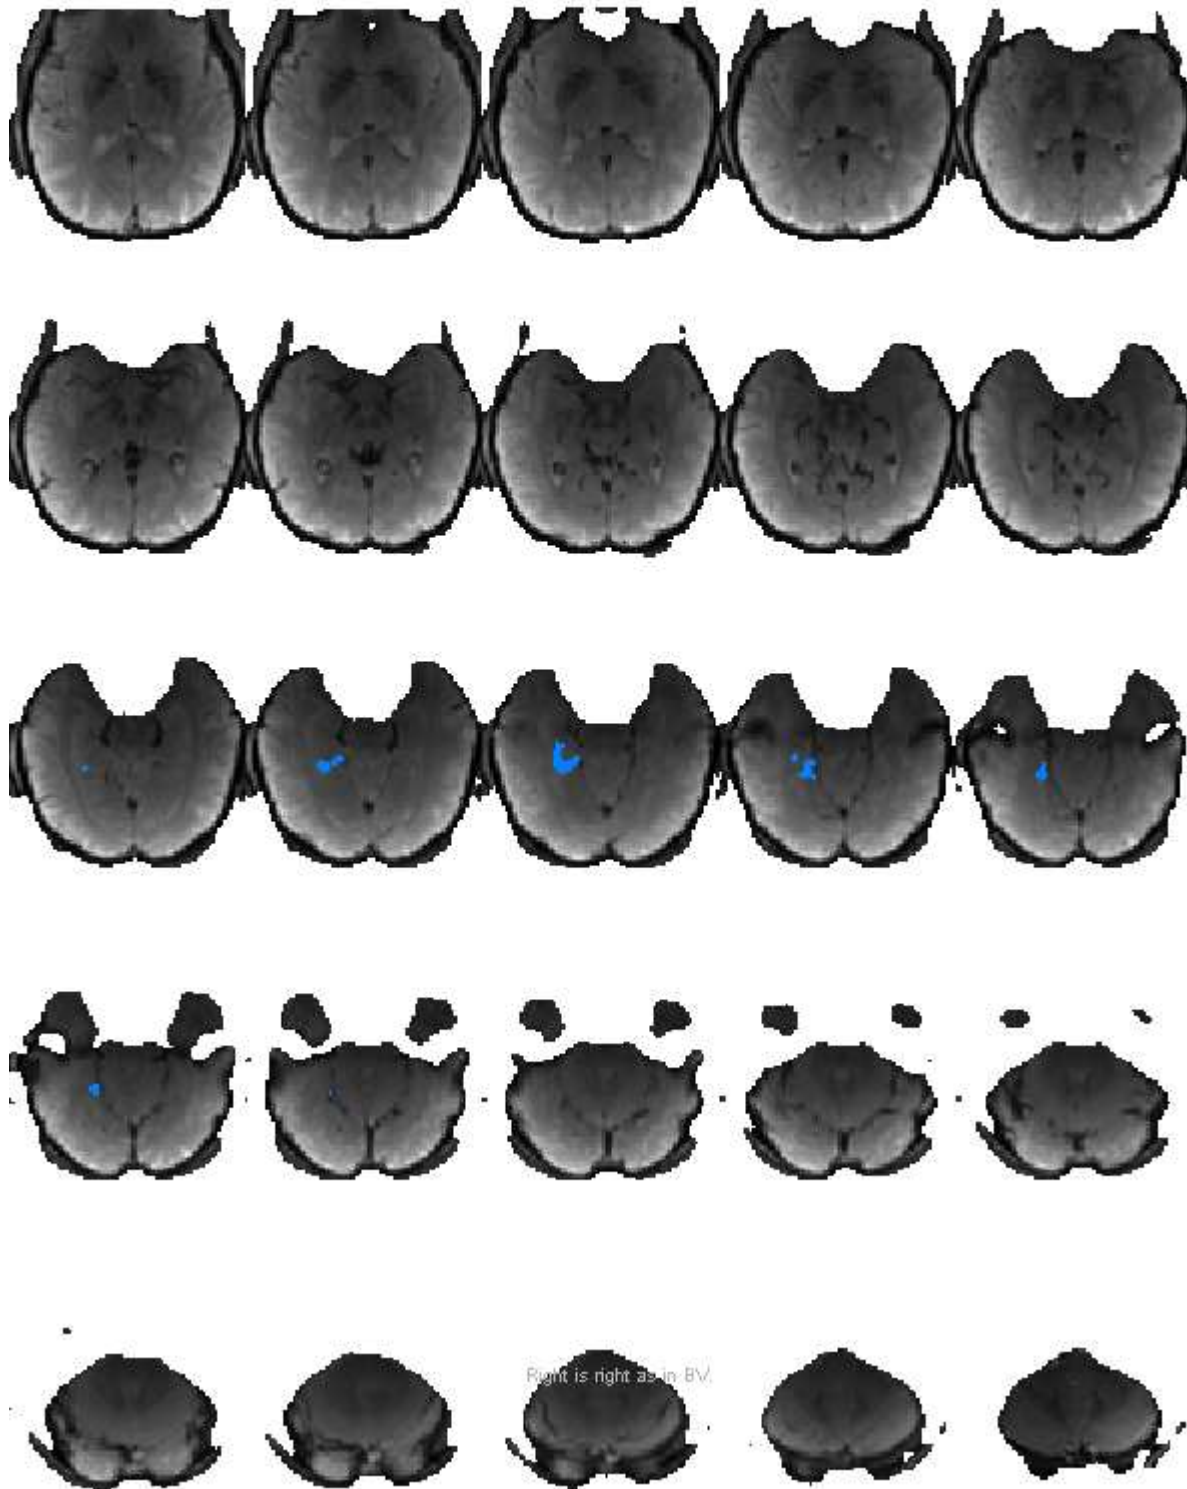

ROI for PPA<sub>L</sub> (128)

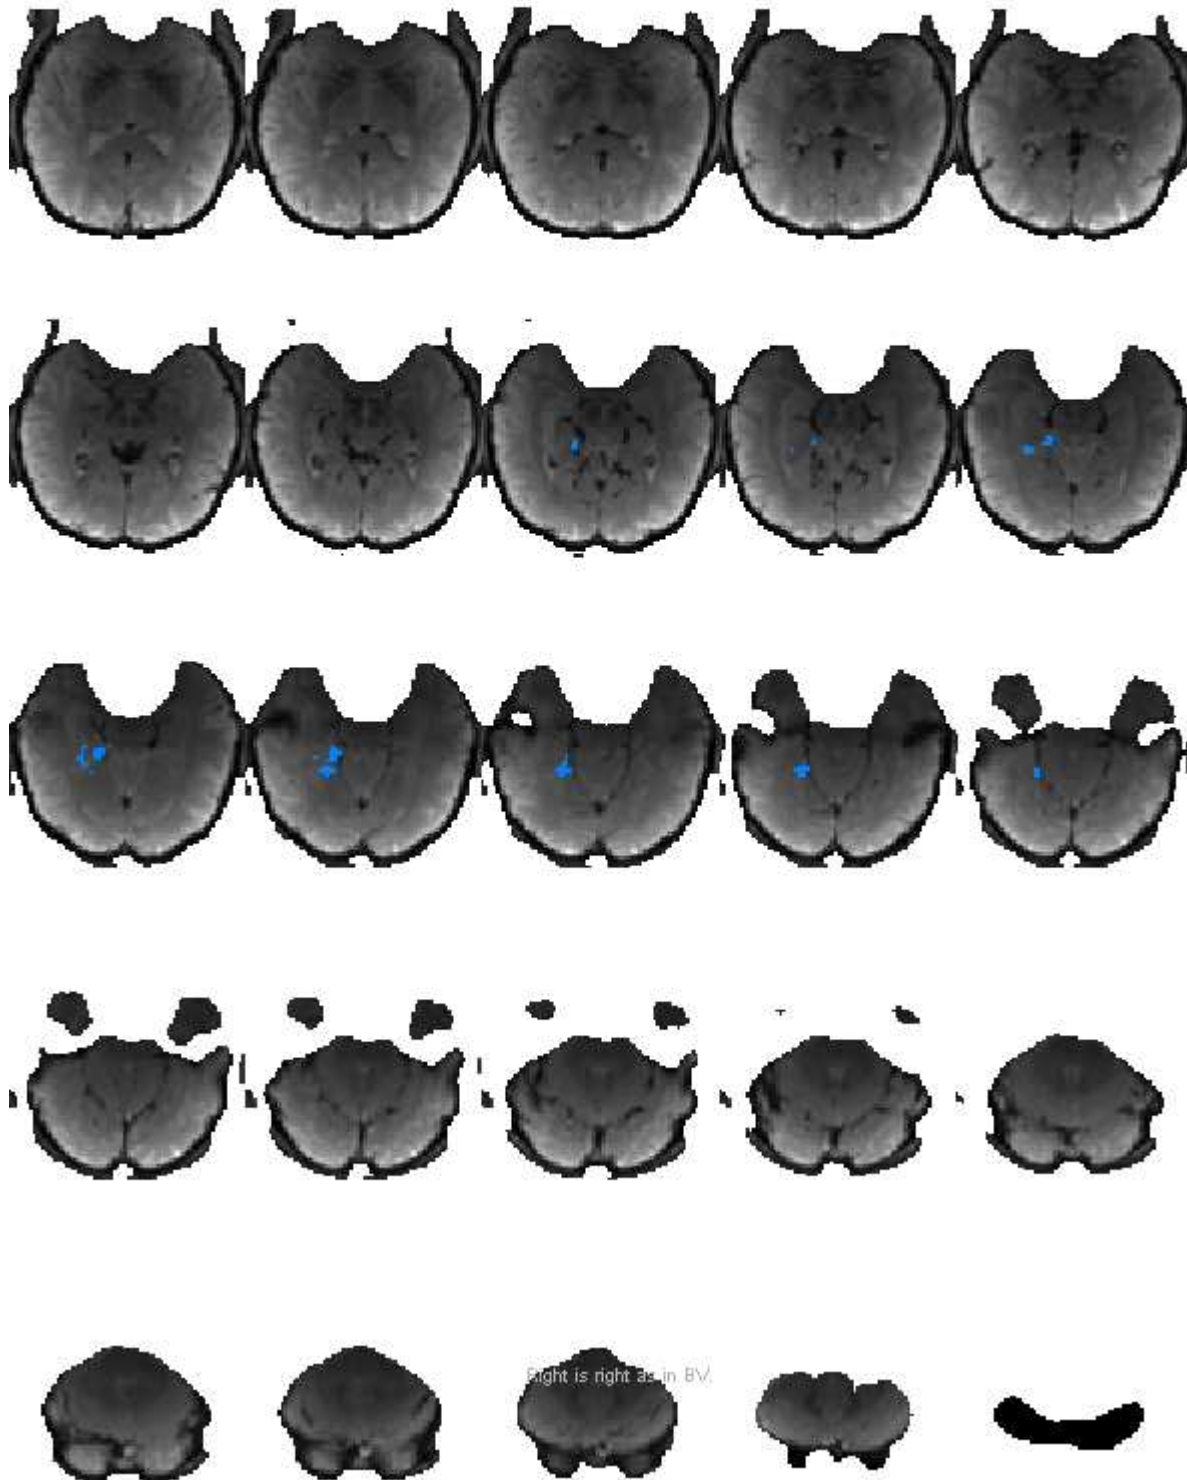



ROI for PPA<sub>L</sub> (128)

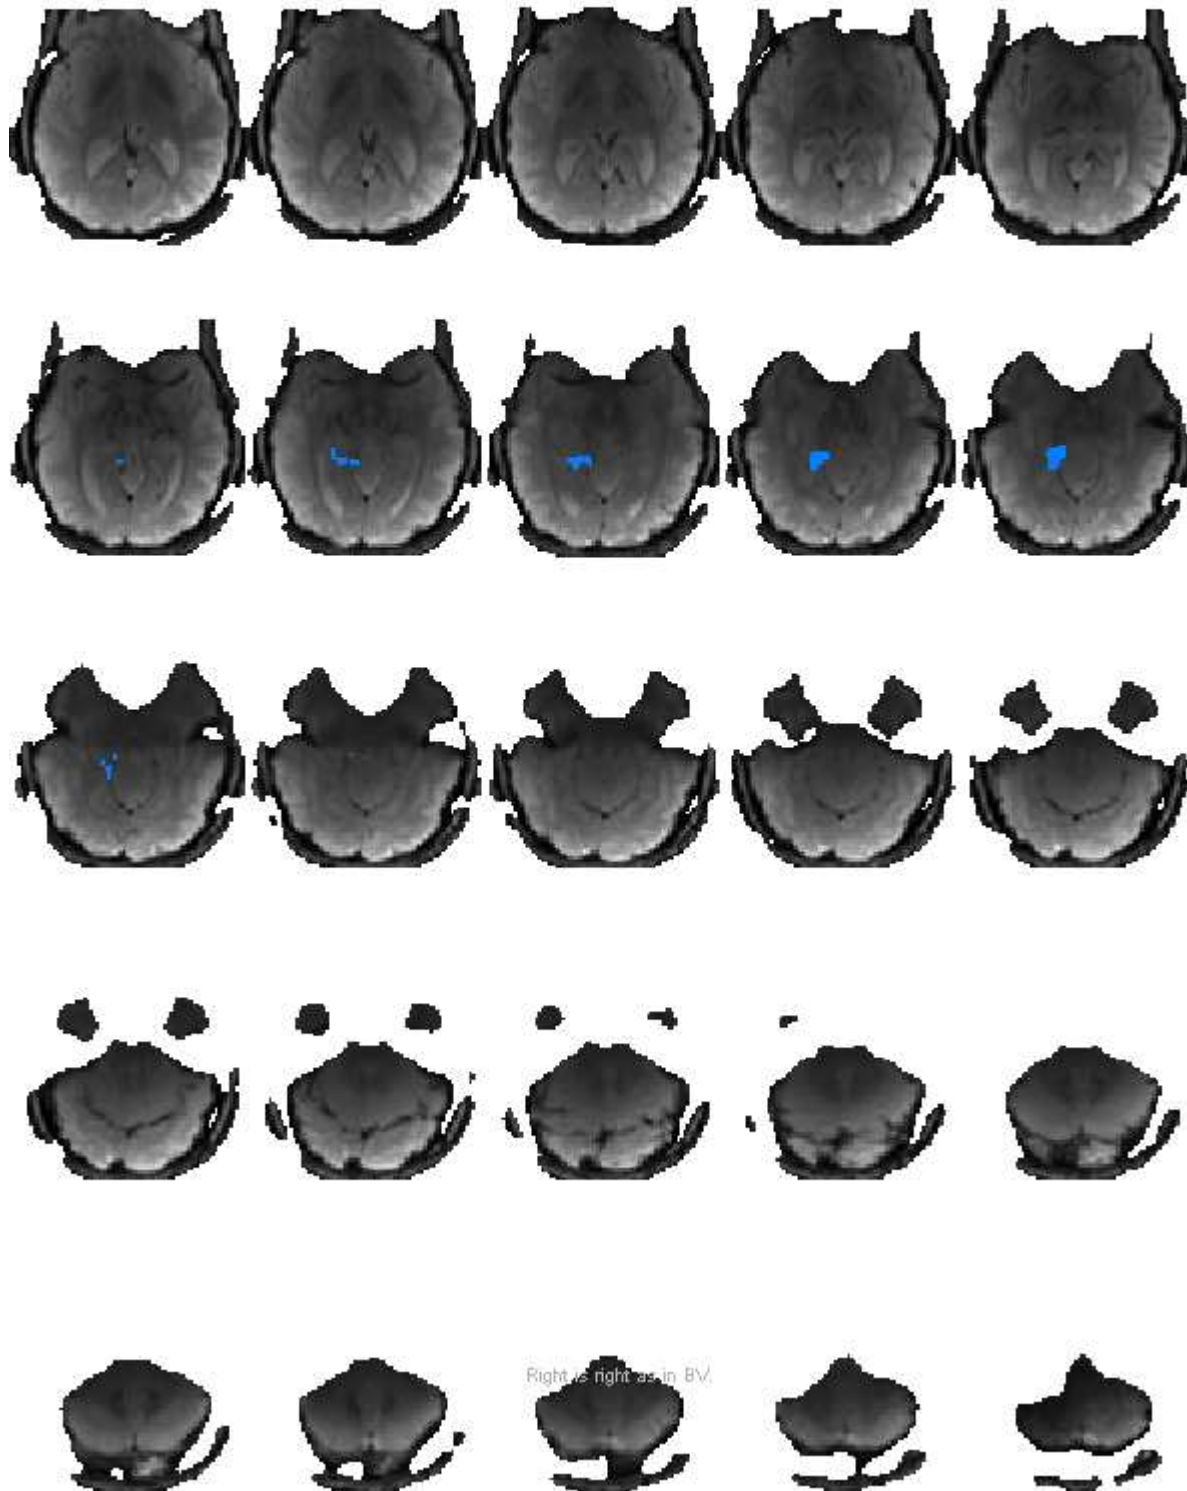

ROI for PPA<sub>L</sub> (128)

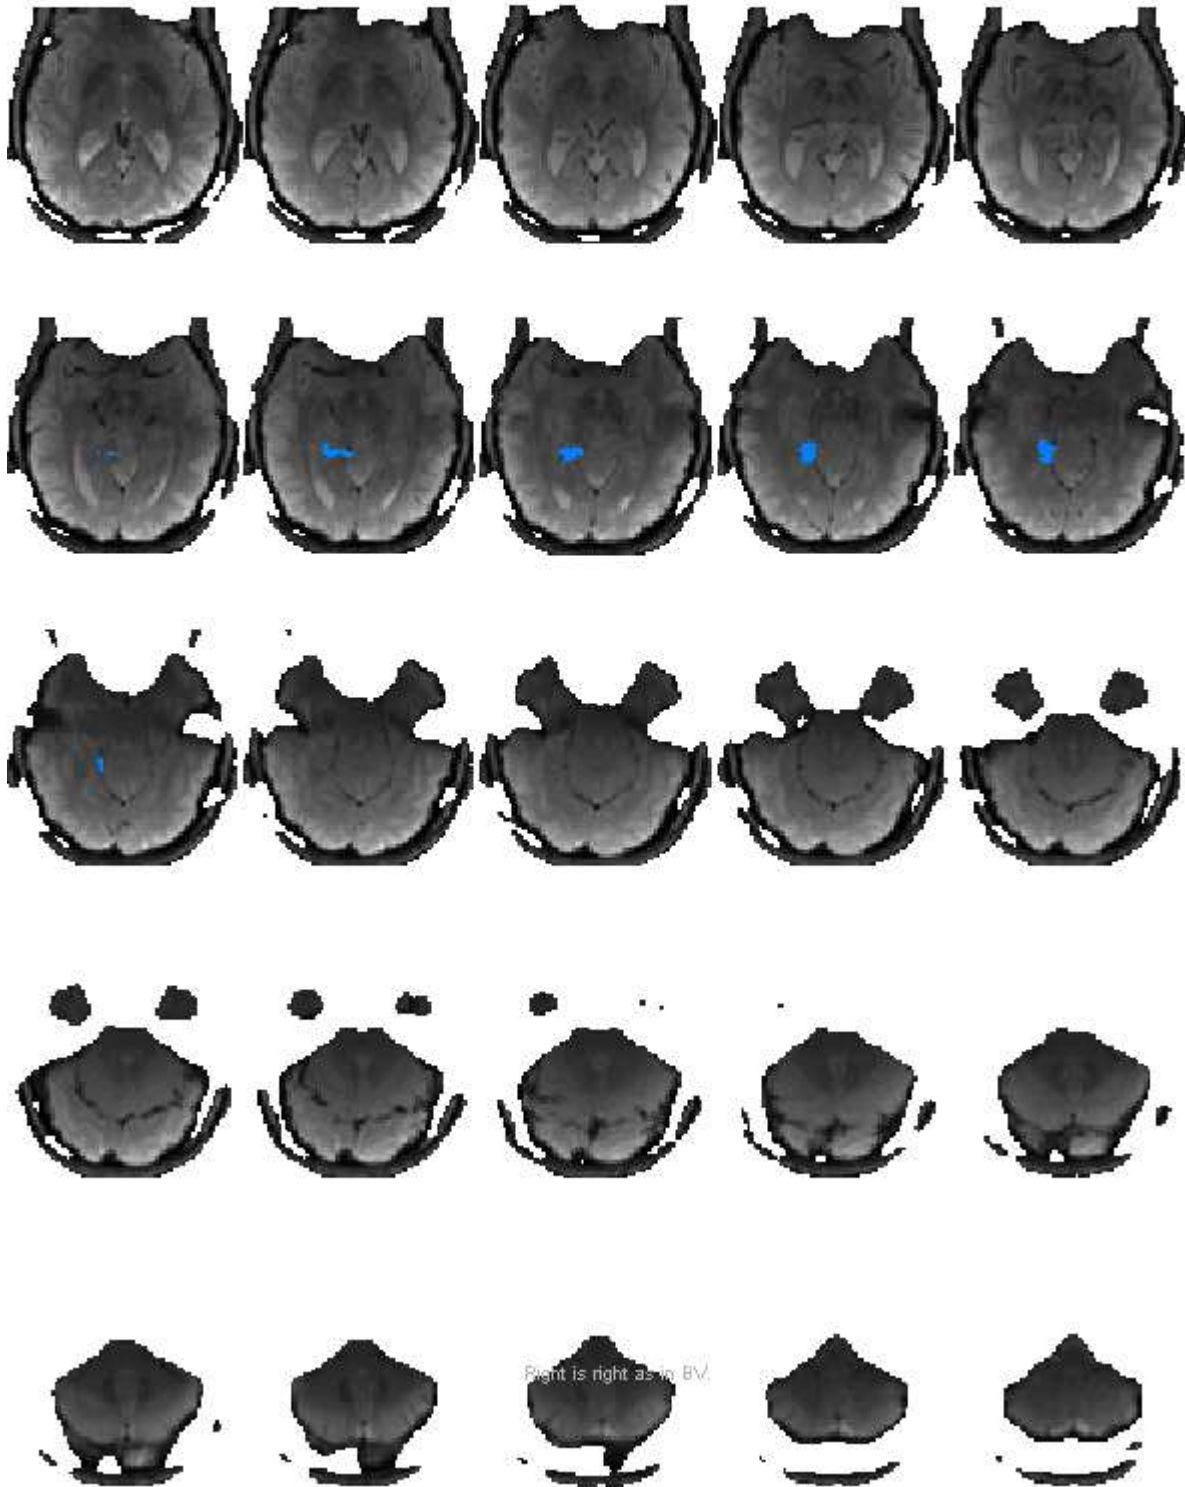



ROI for PPA<sub>L</sub> (128)

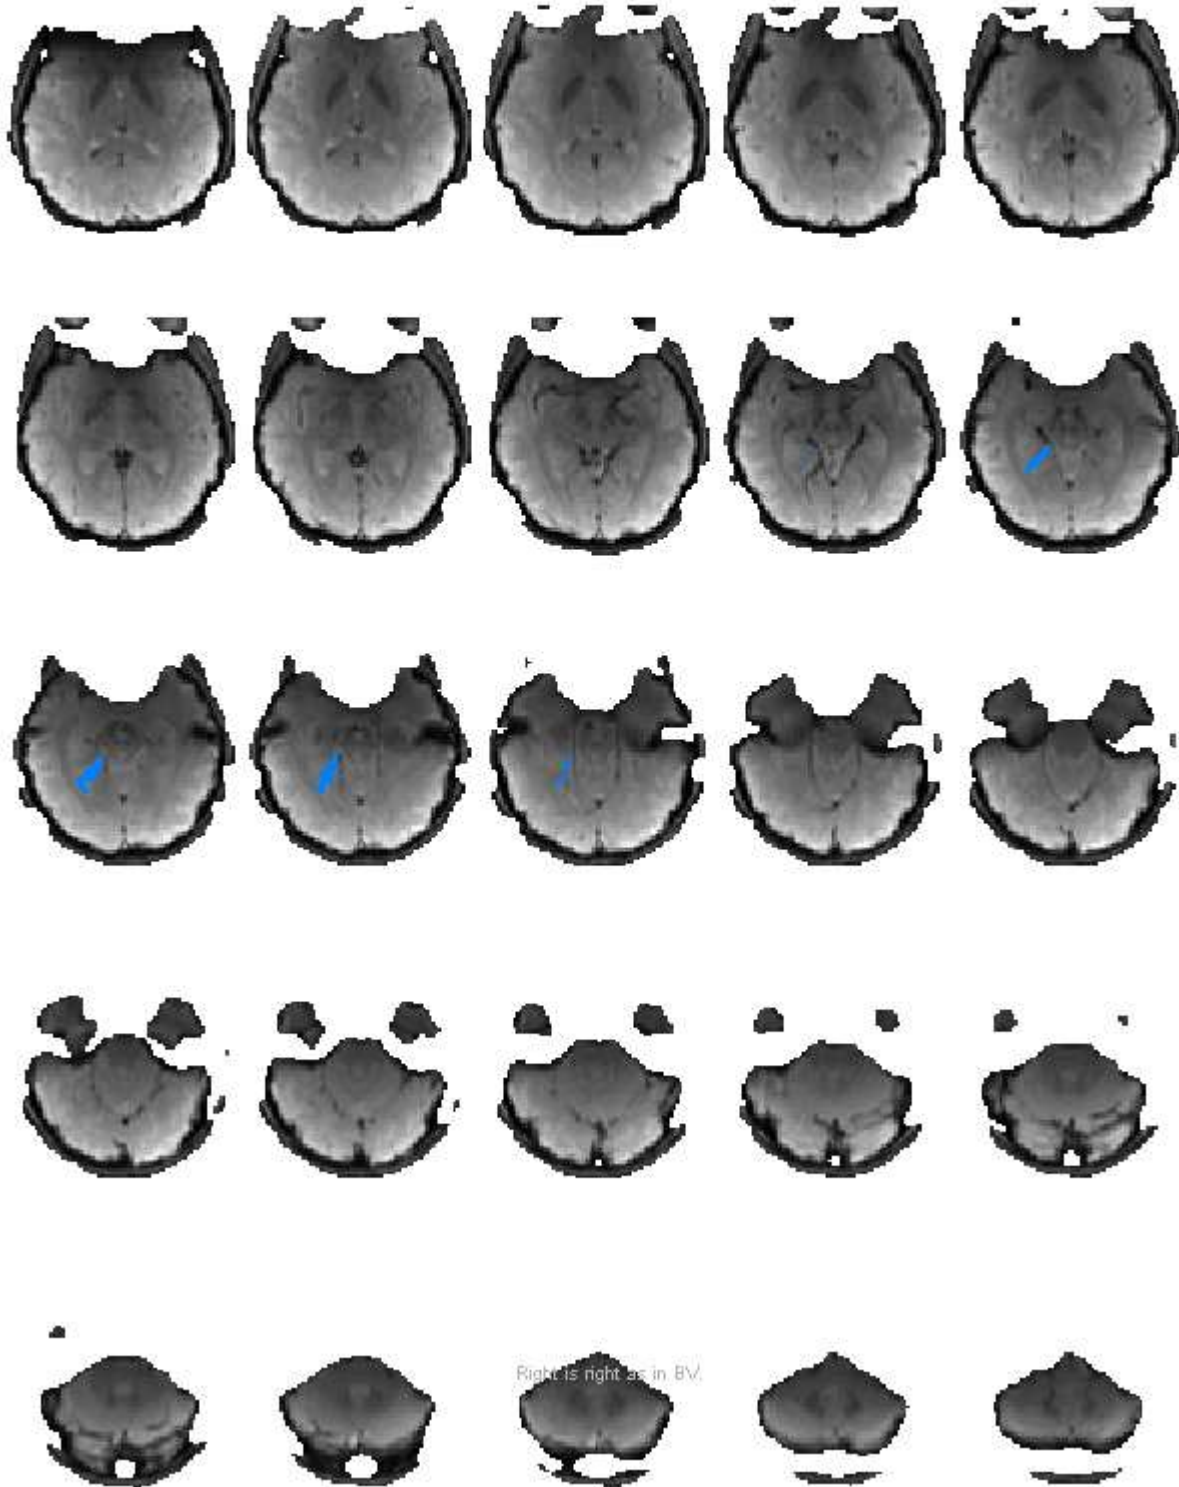

ROI for PPA<sub>L</sub> (128)

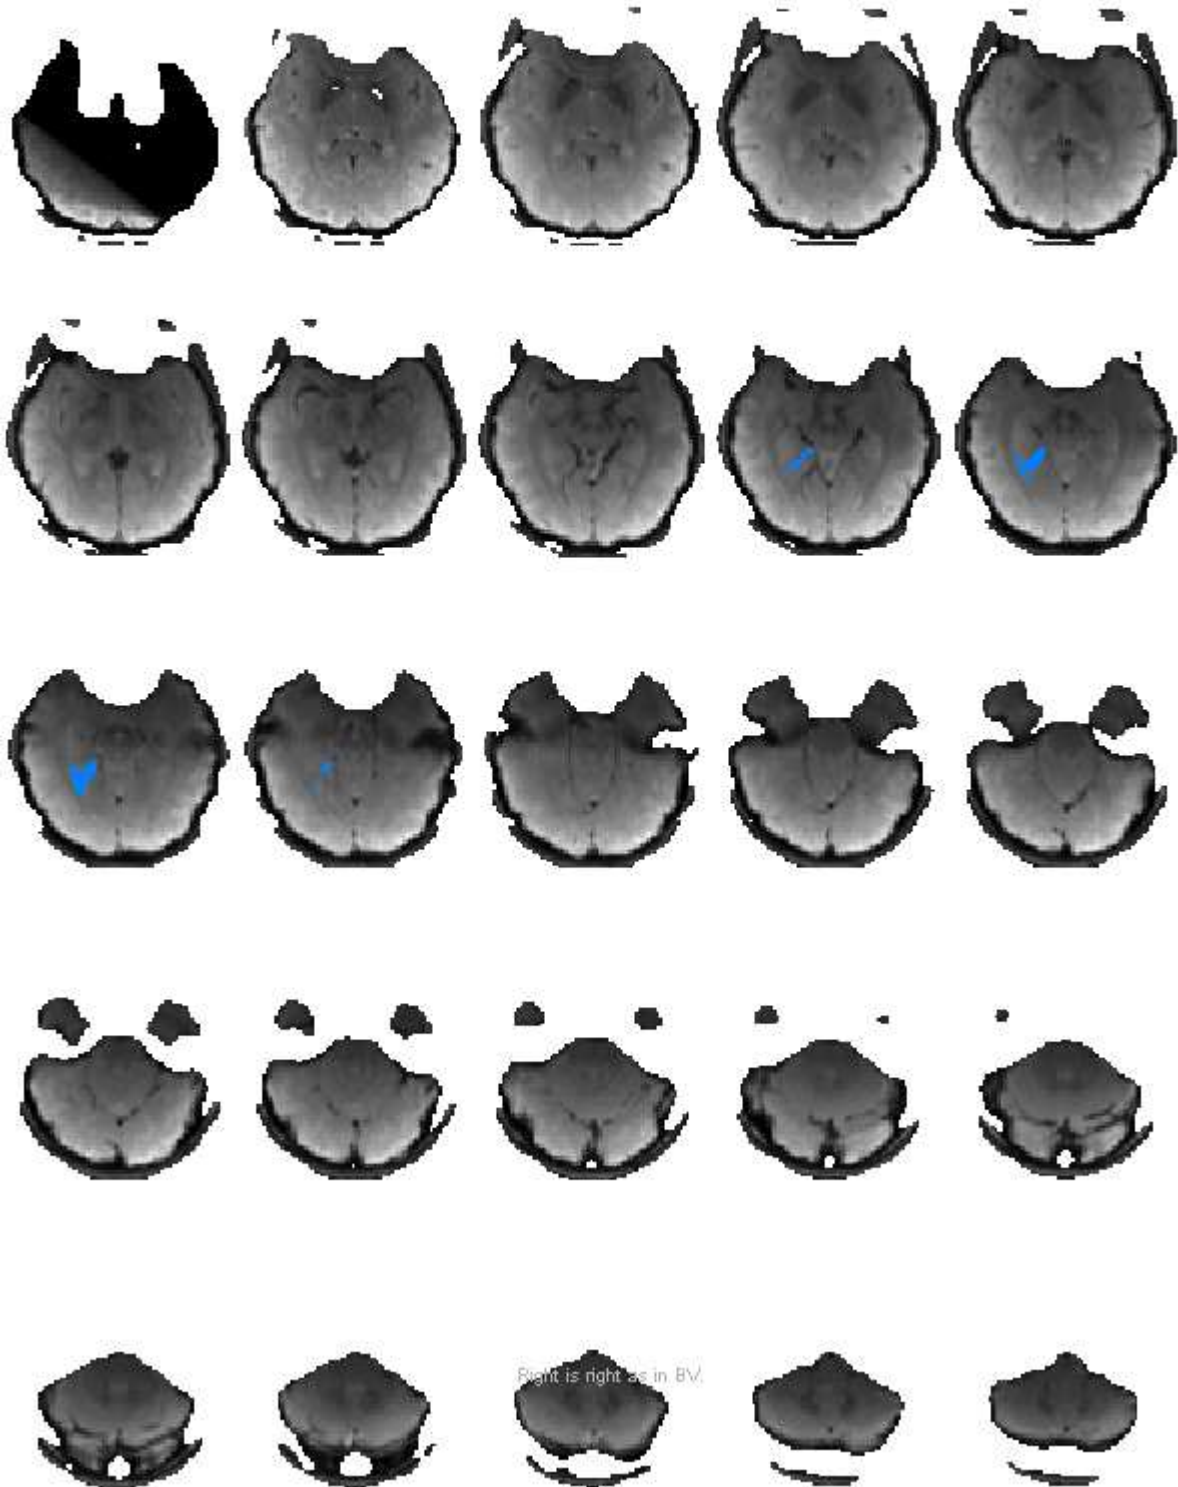

ROI for PPA<sub>L</sub> (128)

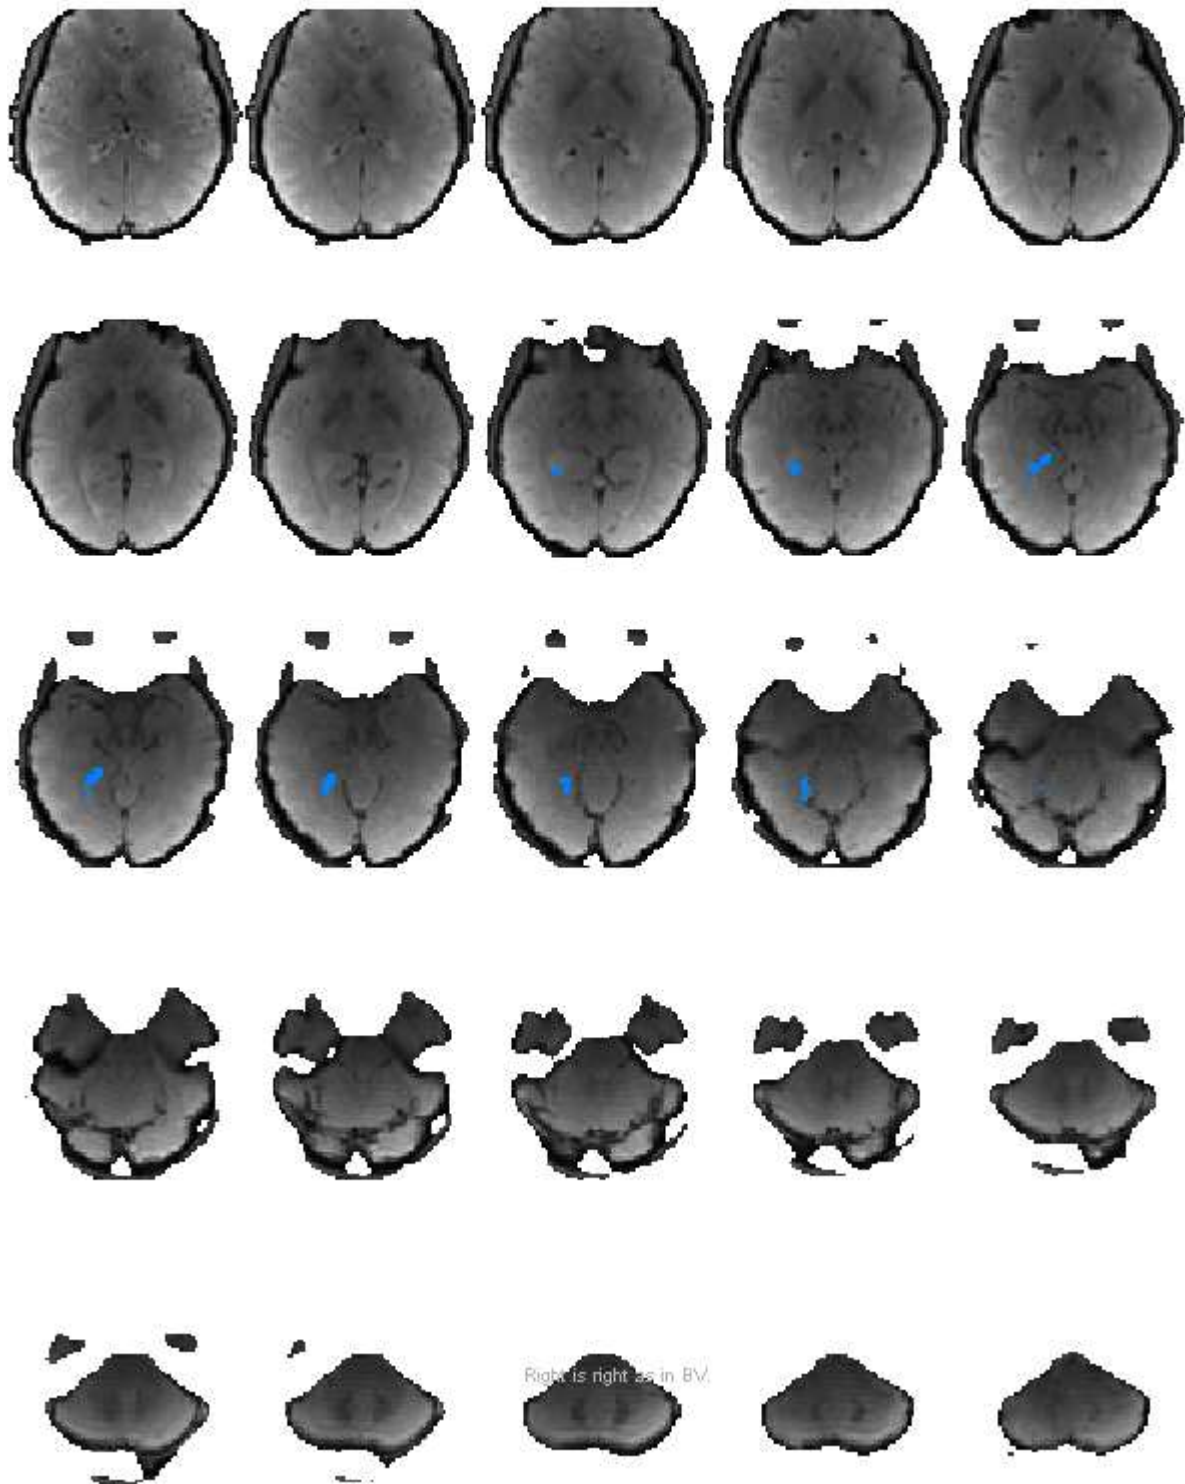

ROI for PPA<sub>L</sub> (128)

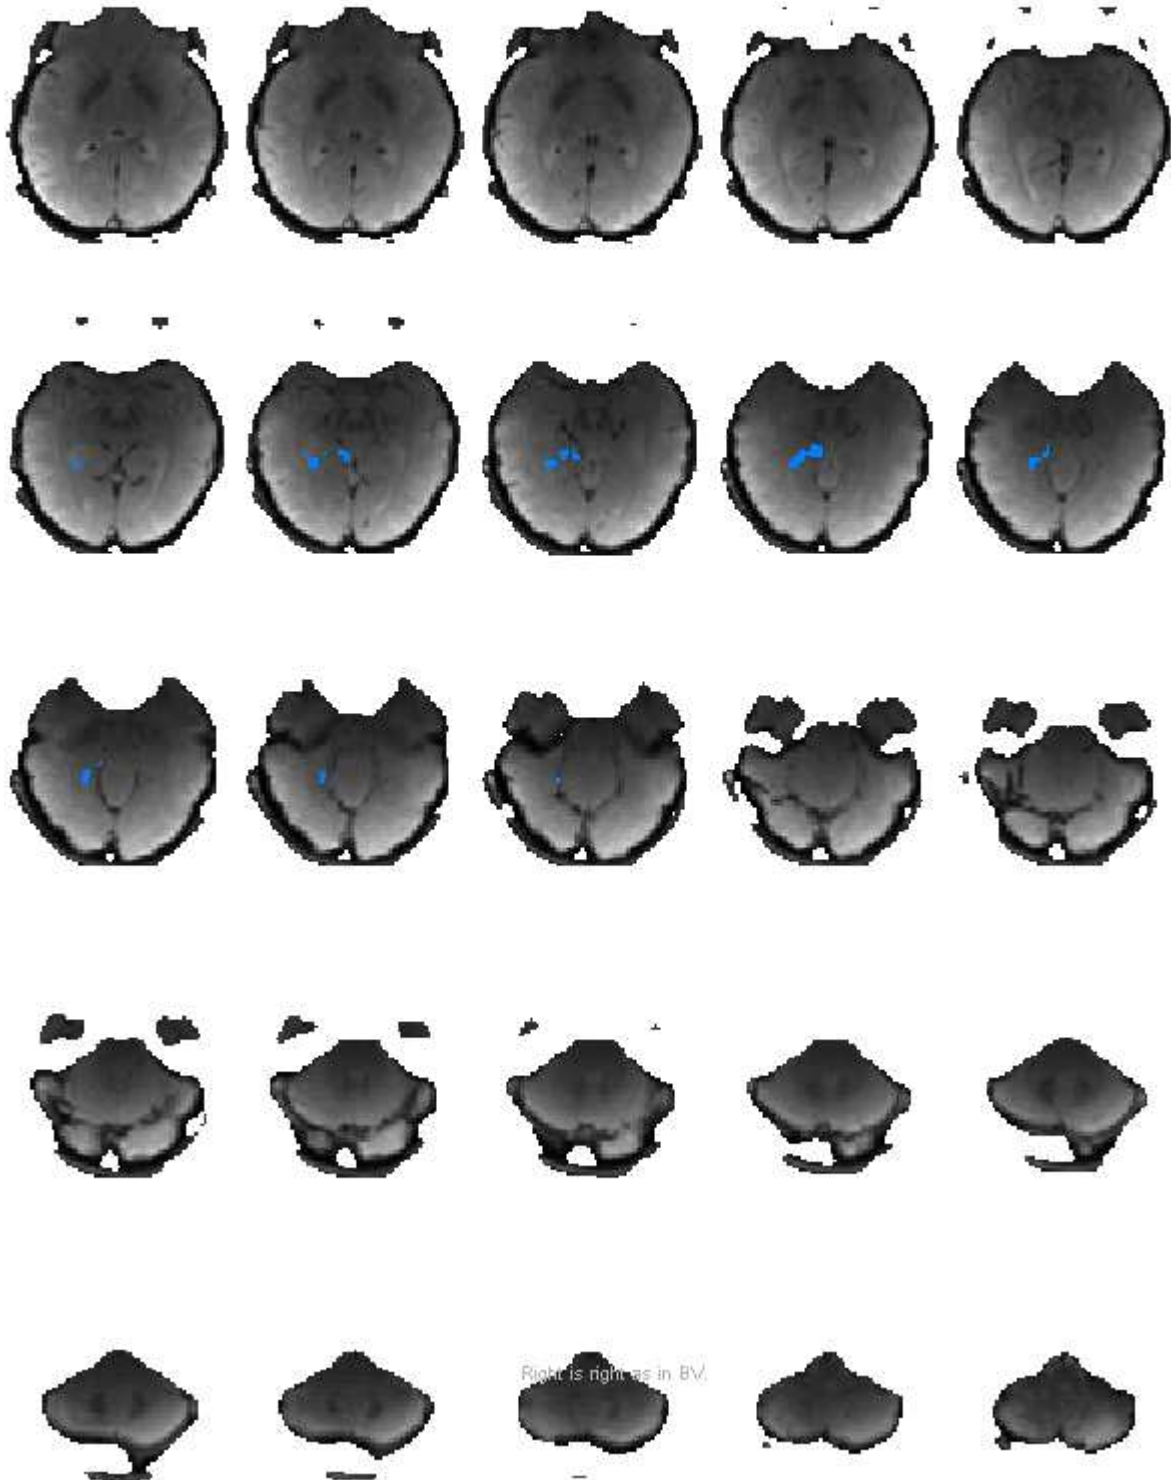



ROI1,1,7,4

subject 1  
session 1  
PPA<sub>R</sub>  
128 voxels

ROI for PPA<sub>R</sub> (128)

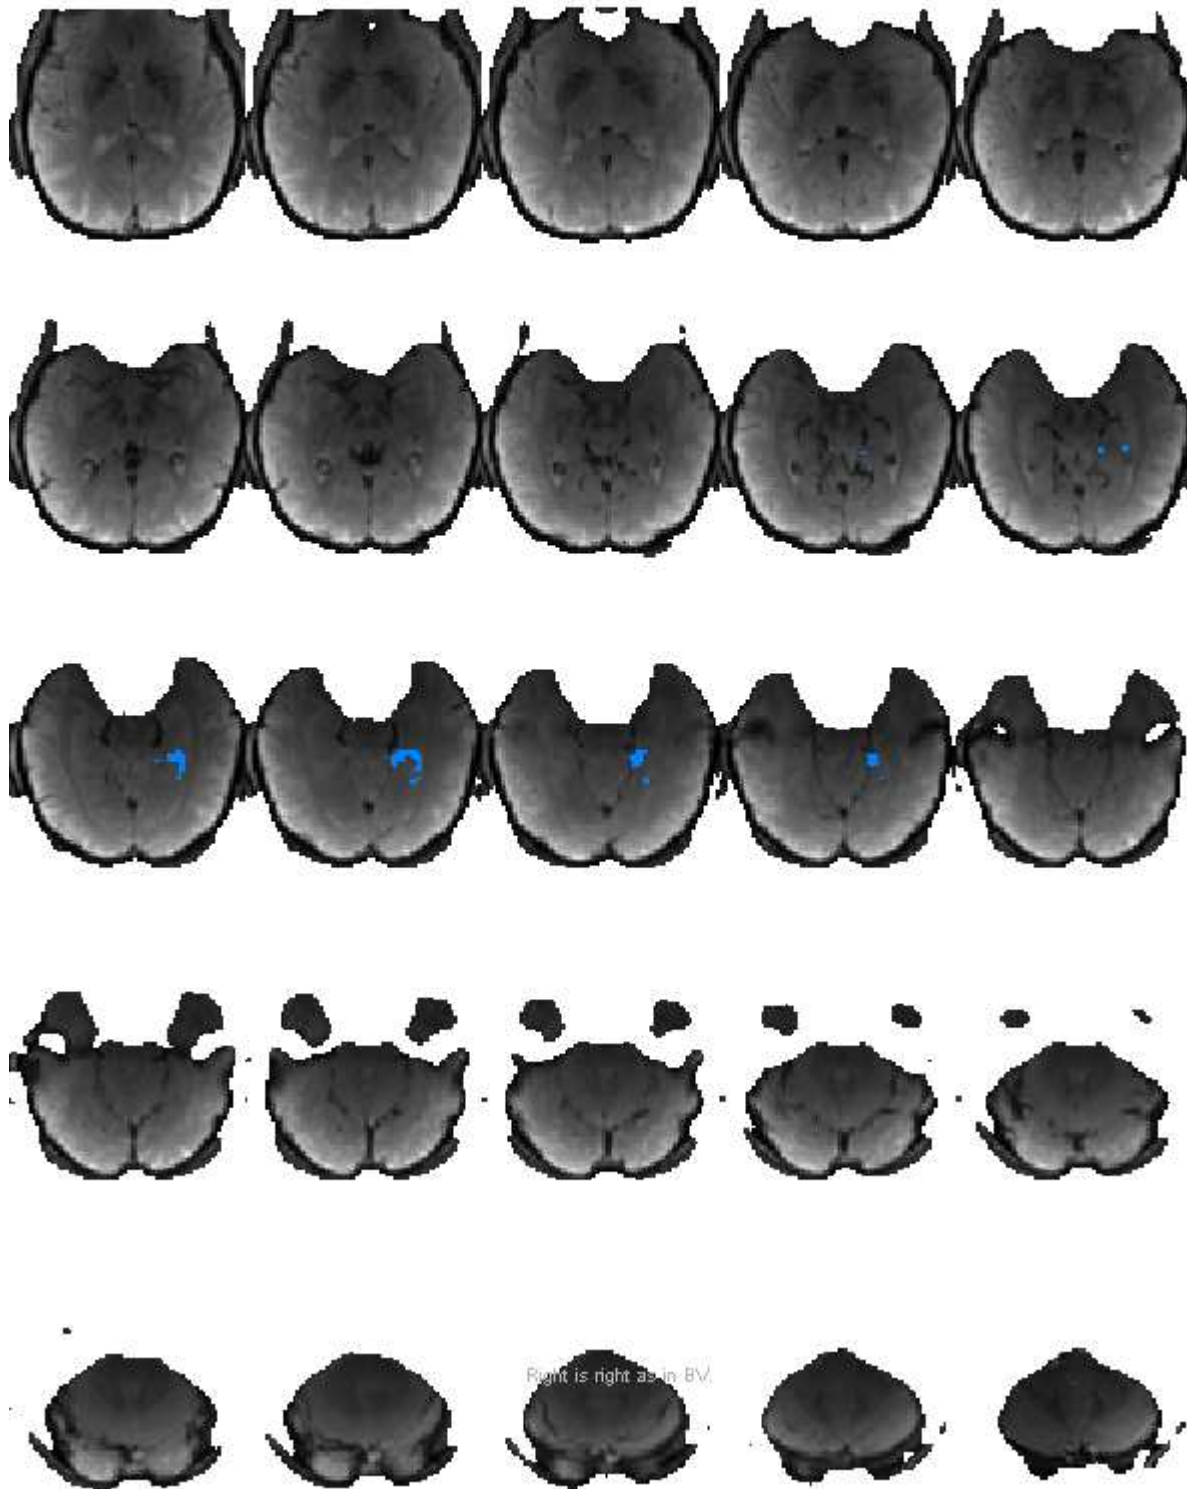

ROI for PPA<sub>R</sub> (128)

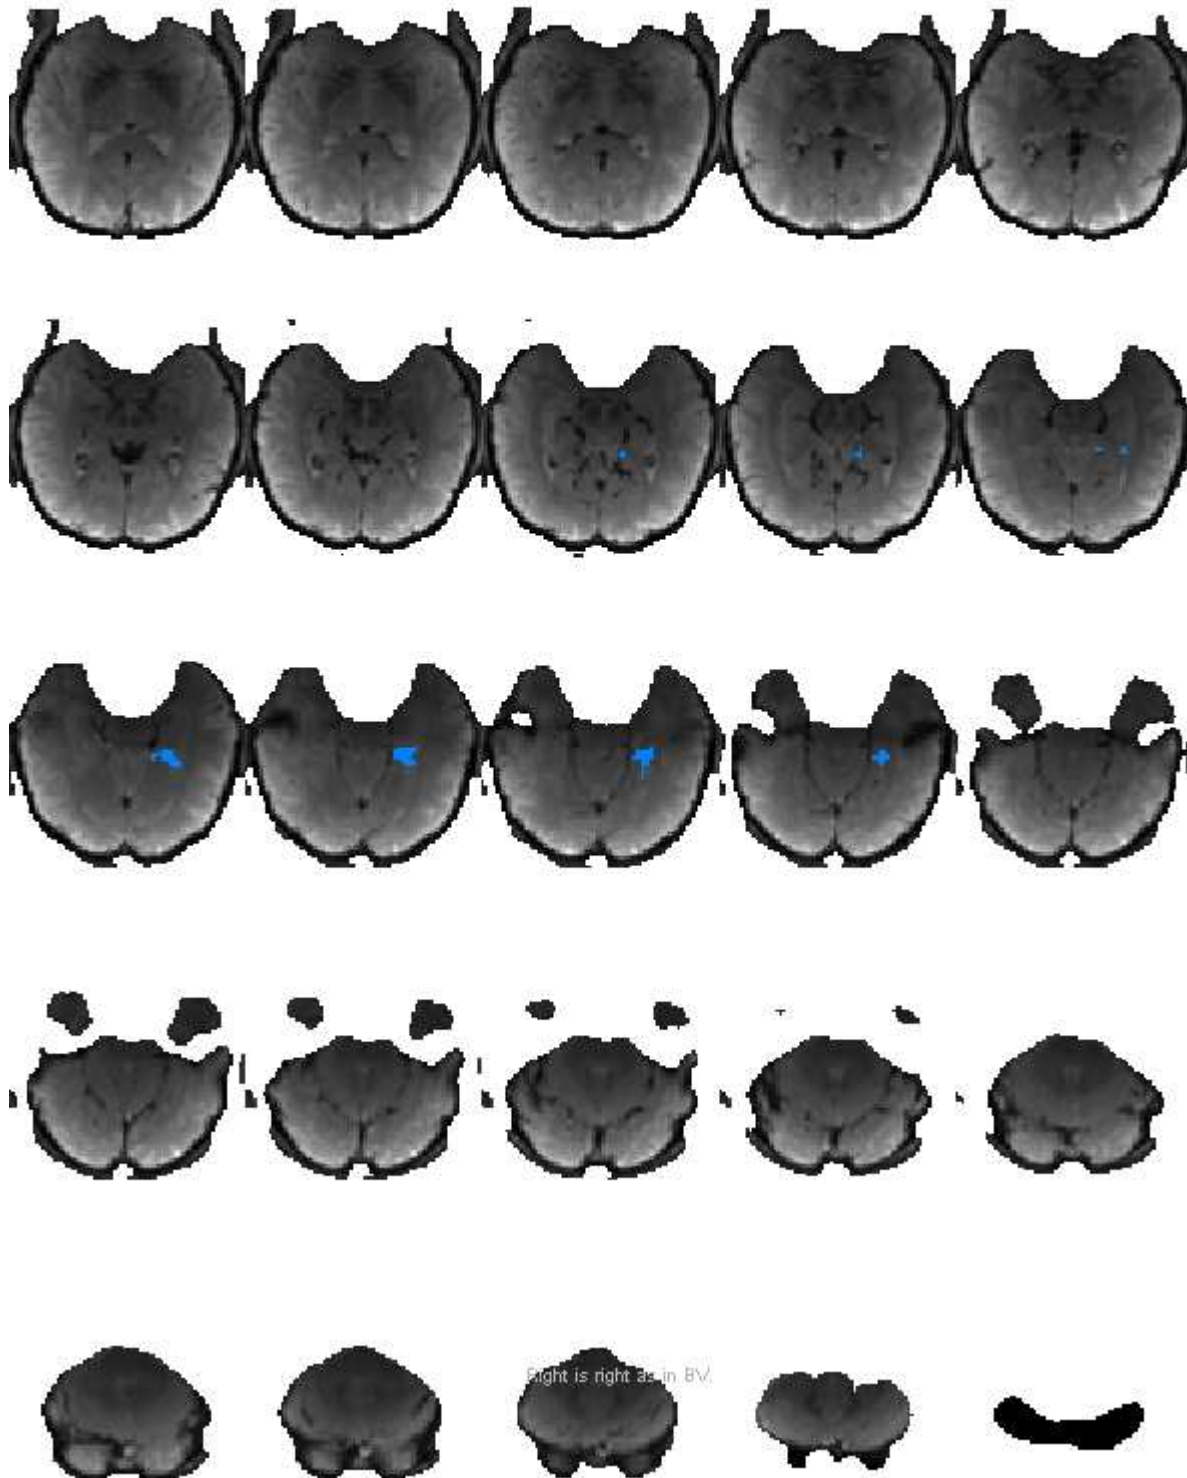



ROI for PPA<sub>R</sub> (128)

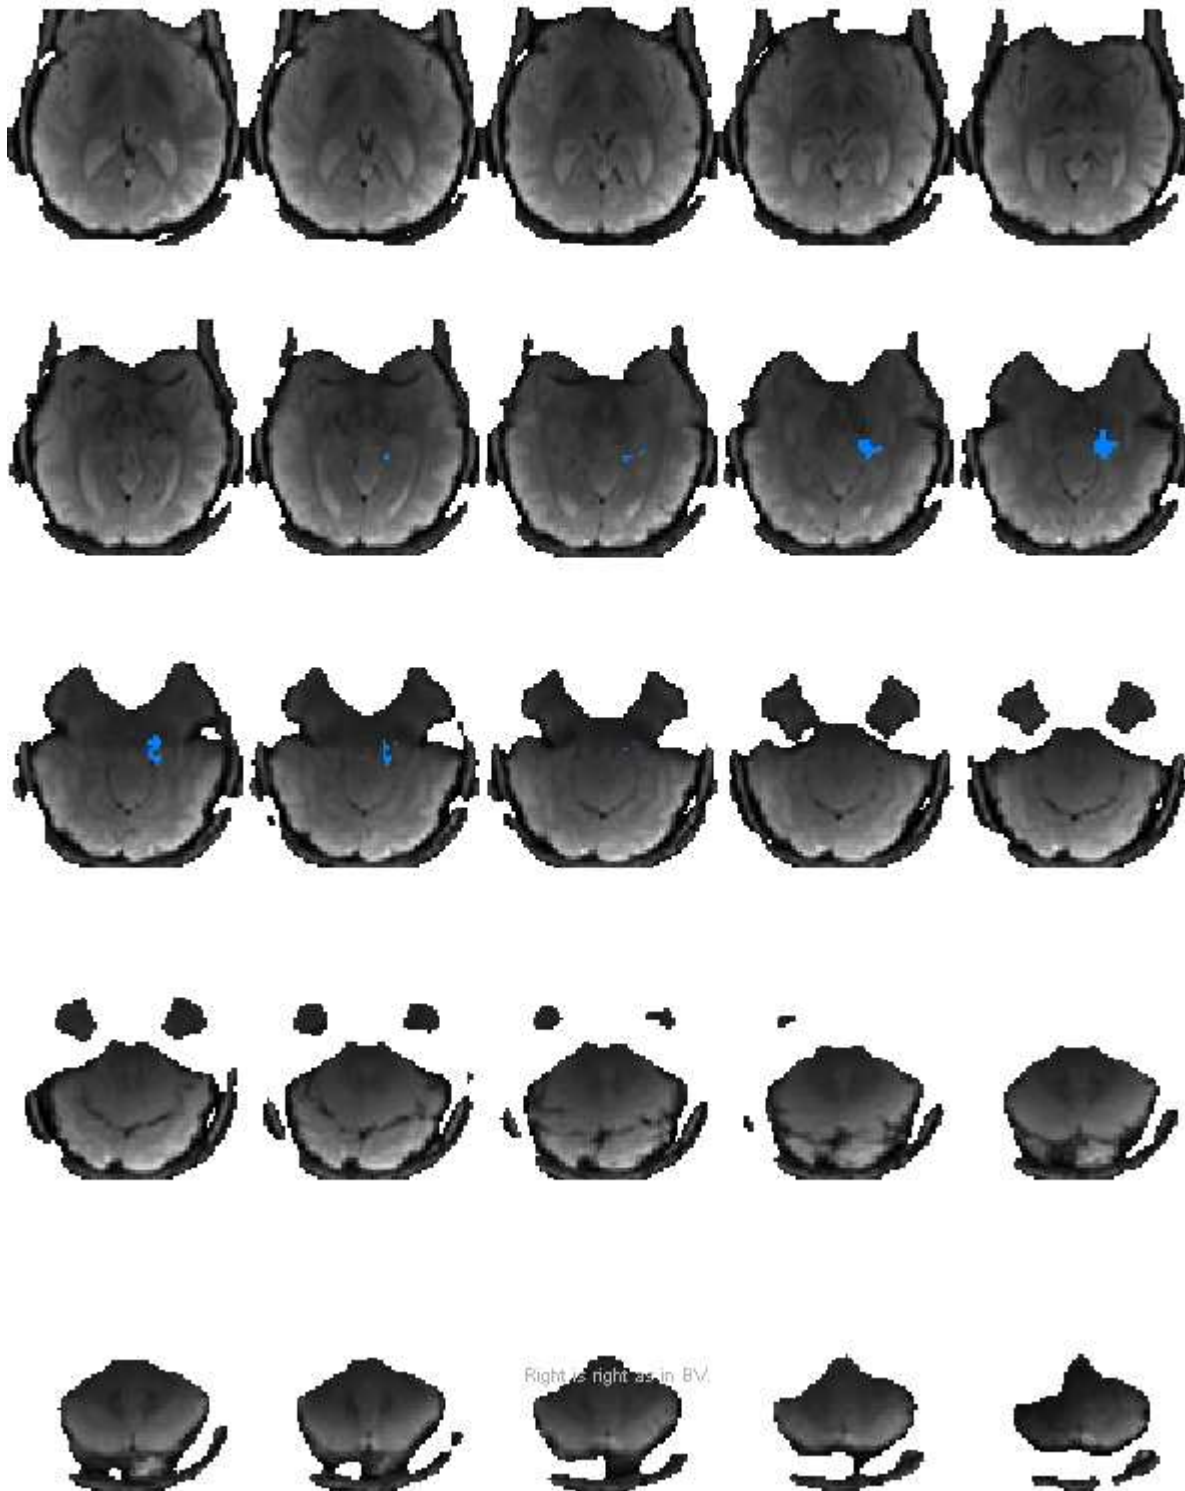

ROI for PPA<sub>R</sub> (128)

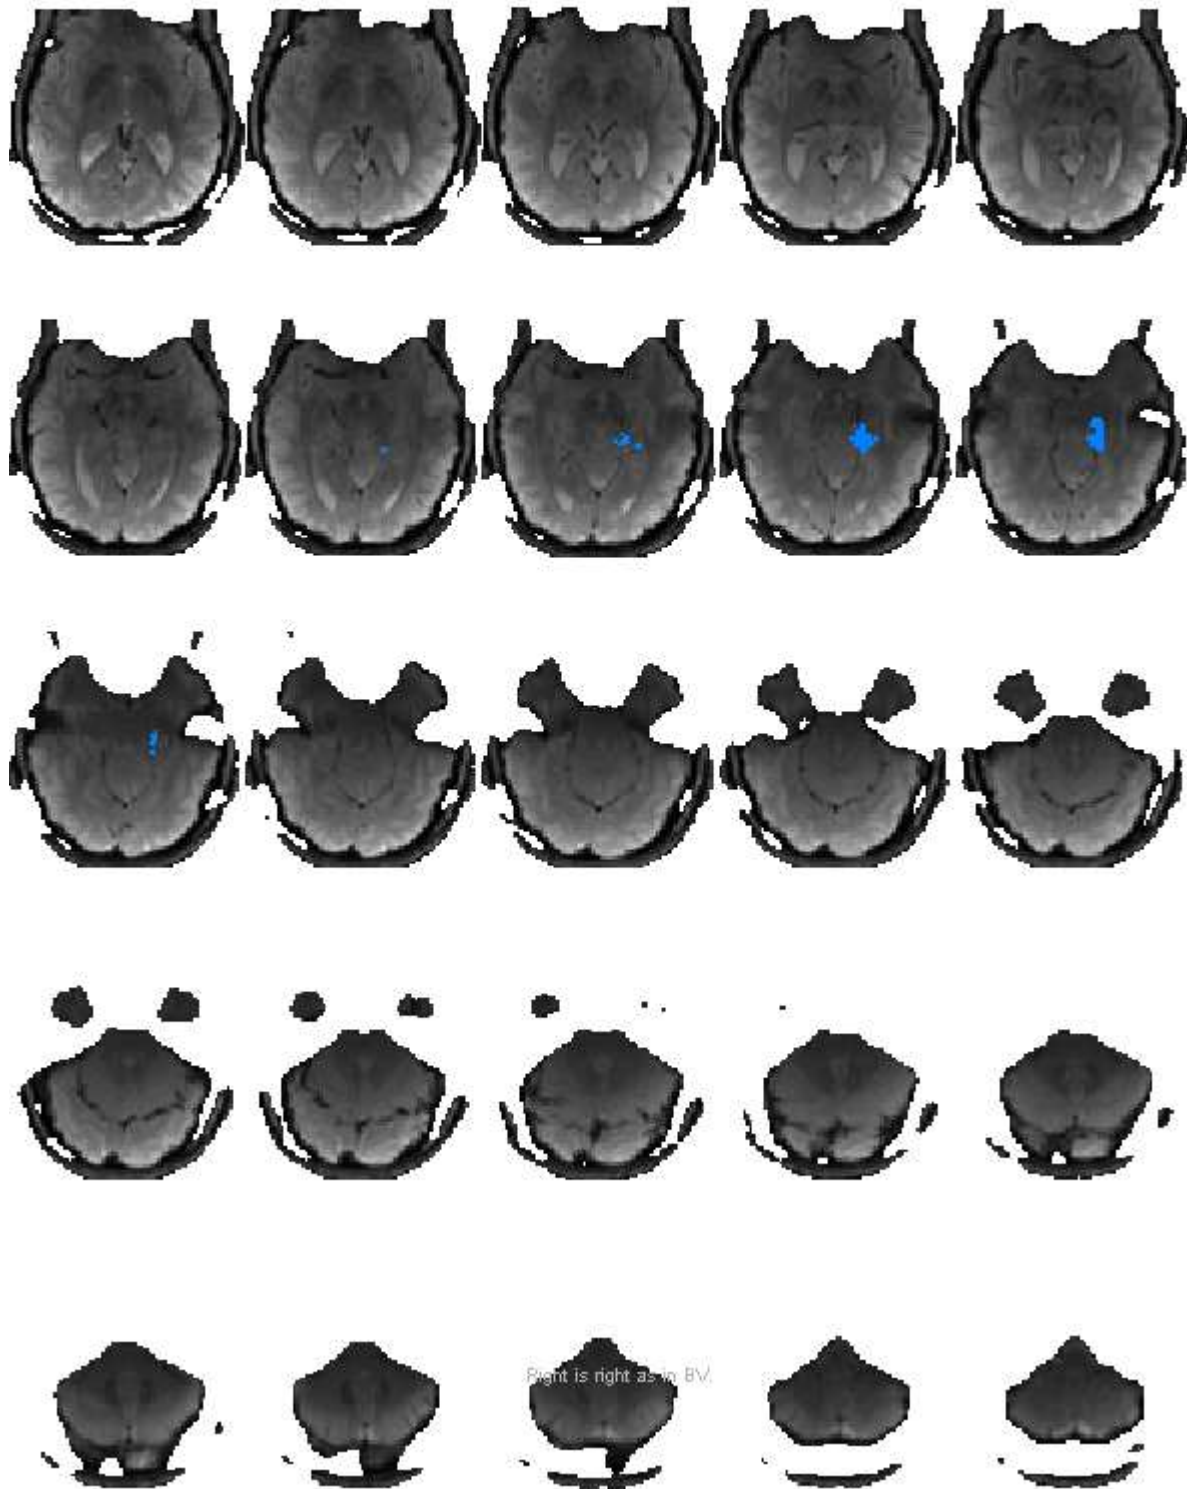

ROI for PPA<sub>R</sub> (128)

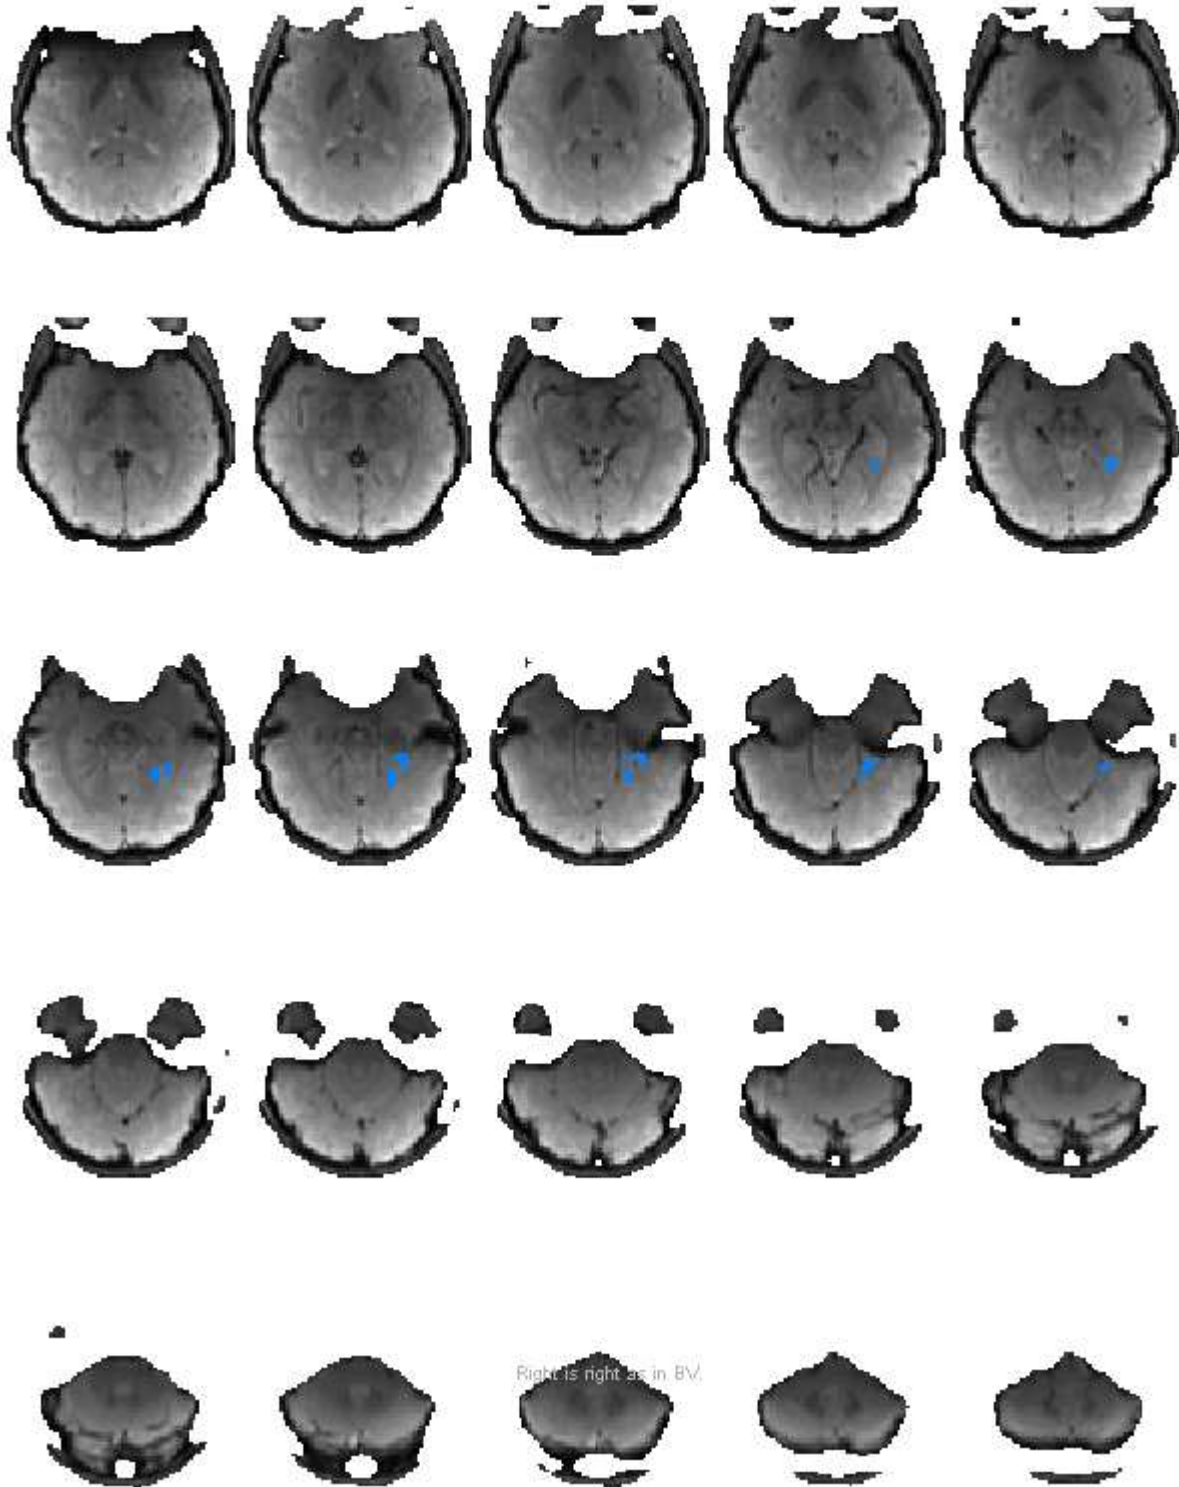

ROI for PPA<sub>R</sub> (128)

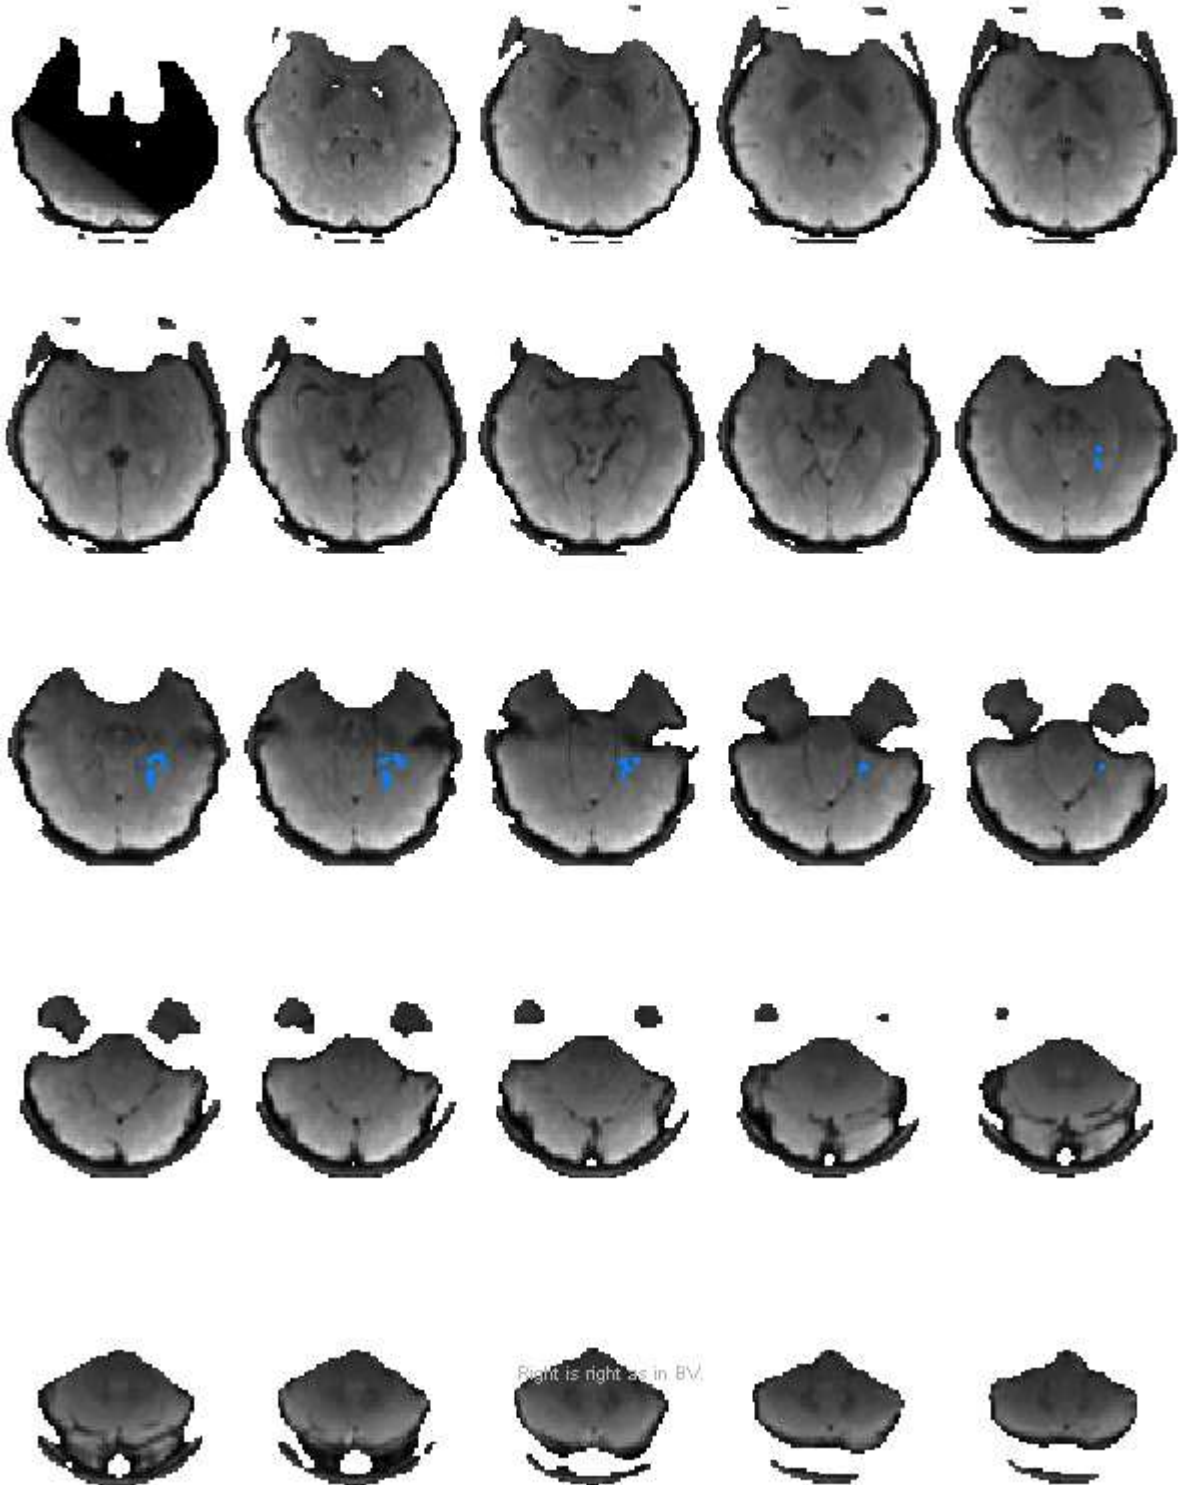



ROI for PPA<sub>R</sub> (128)

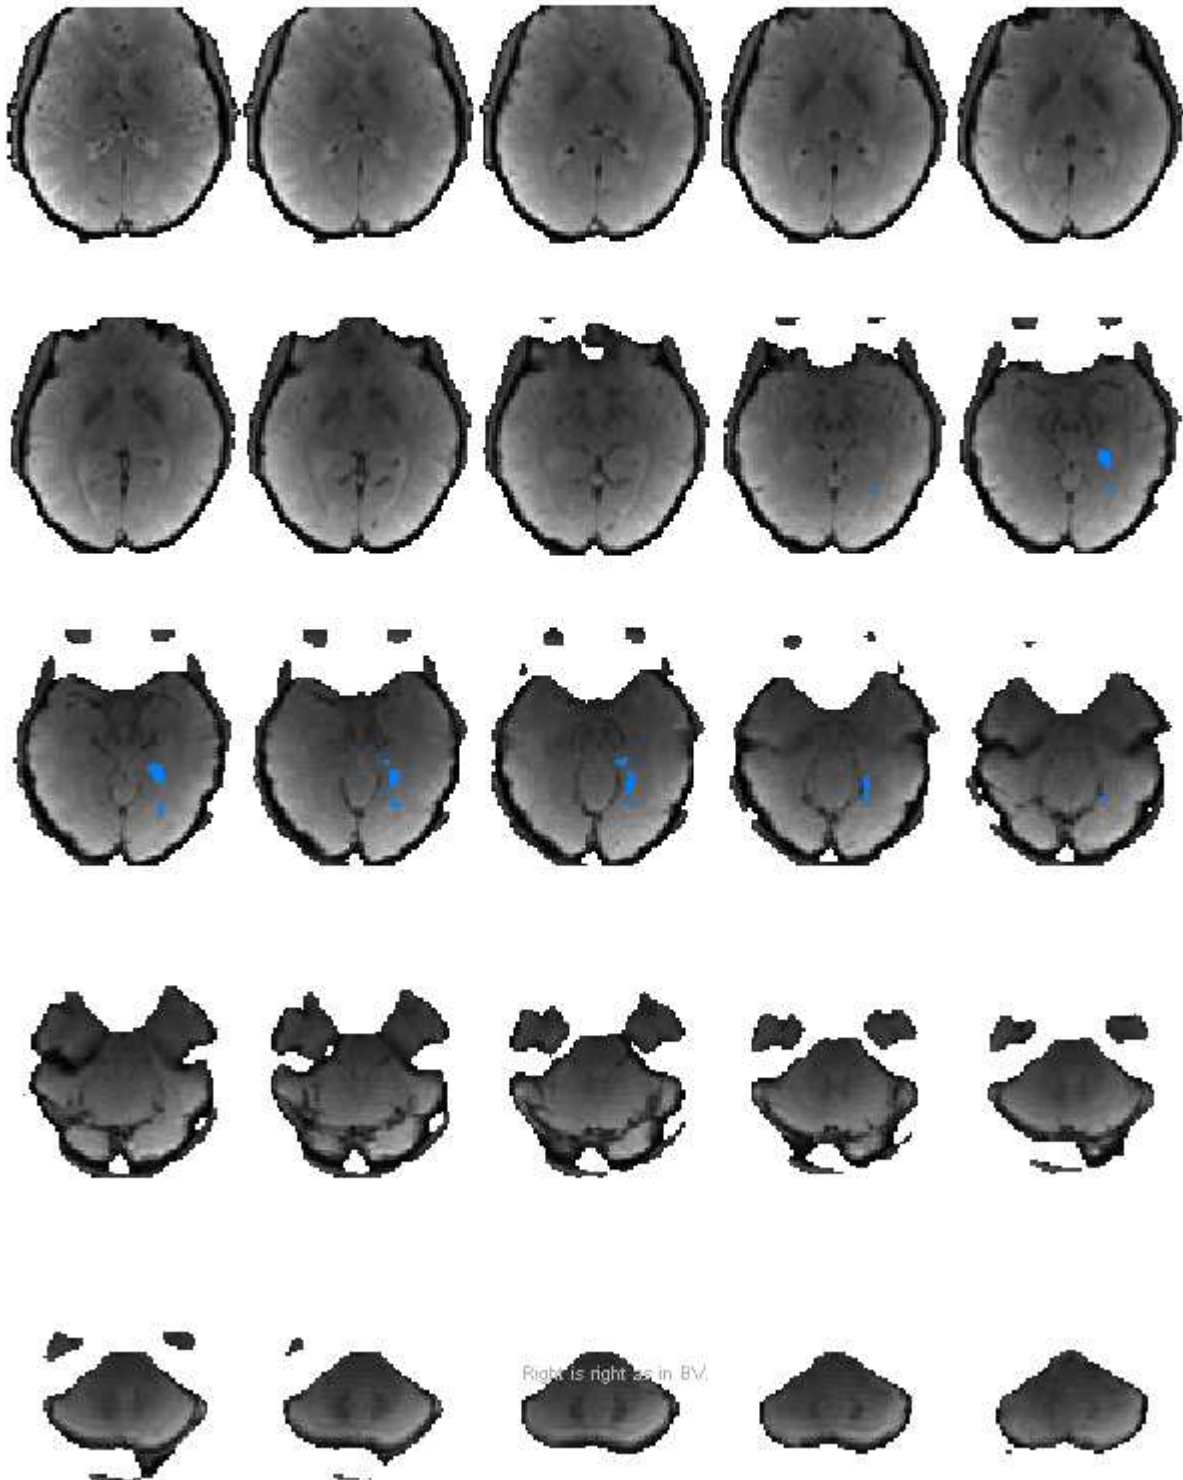



ROI for PPA<sub>R</sub> (128)

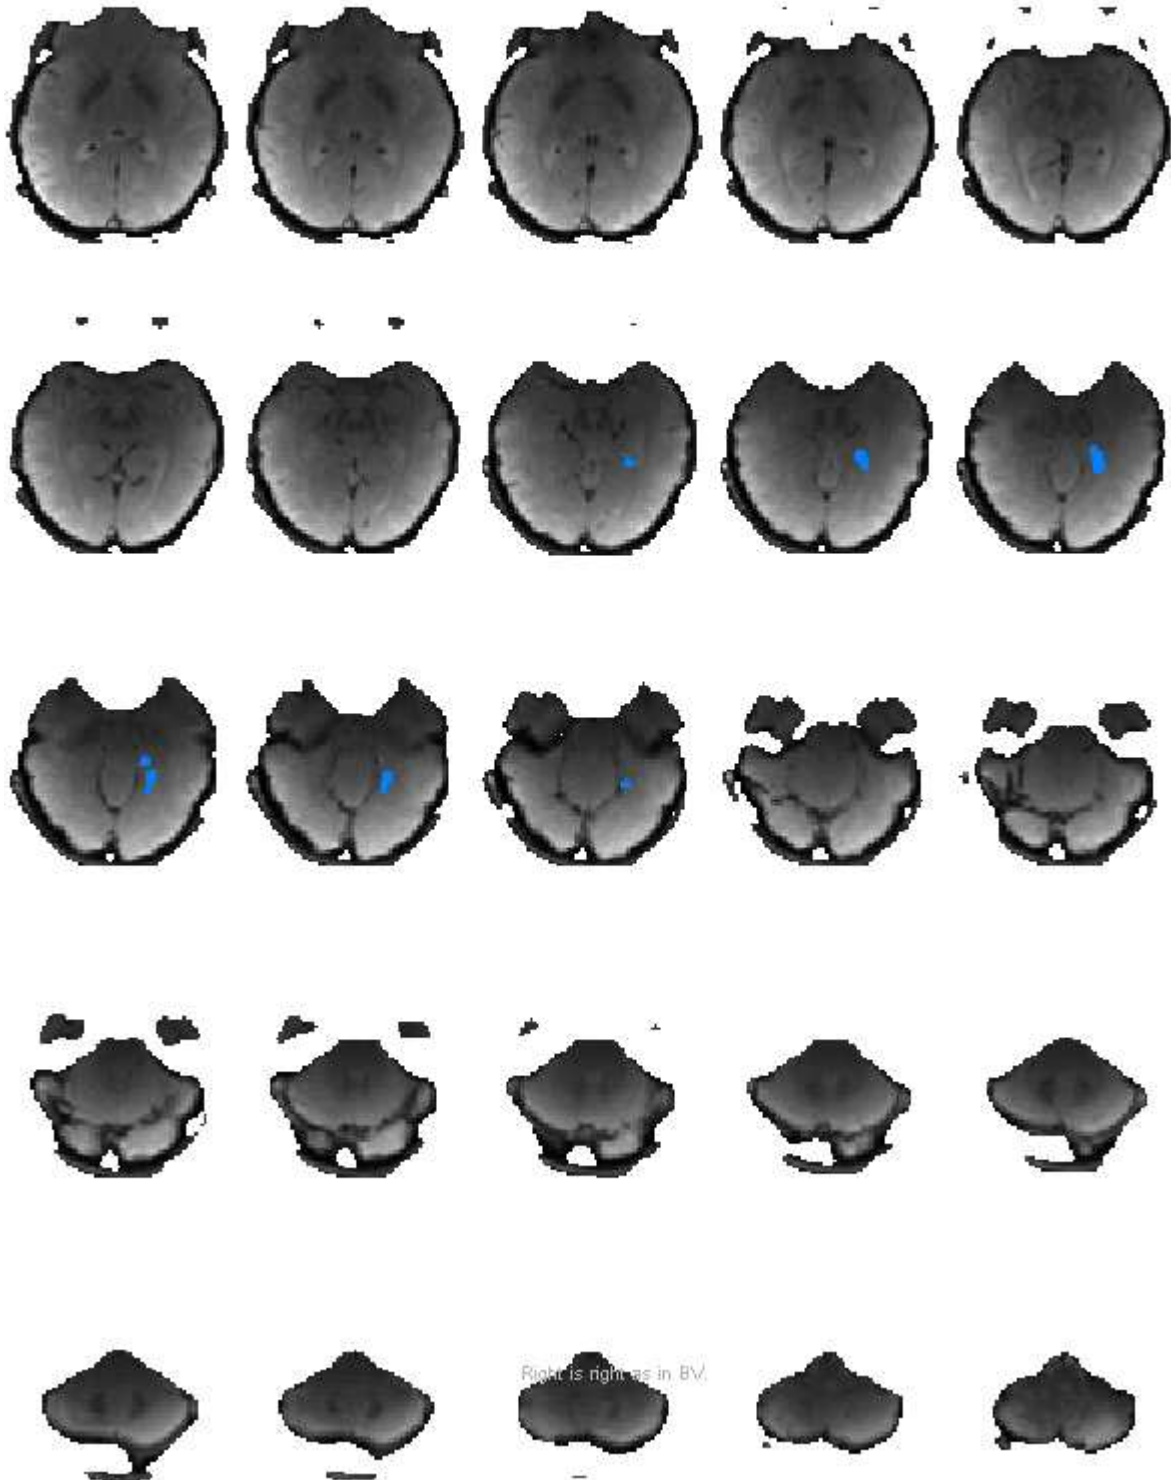

Supplement: pone.0223660.s008.pdf [file pone.0223660.s008.pdf]
