# Supplementary material for: Analysing linear multivariate pattern transformations in neuroimaging data
Source: PubMed Central journal article supplement (PMC6793861; doi:10.1371/journal.pone.0223660), 2019-10-15
Supplement: pone.0223660.s002.pdf [file pone.0223660.s002.pdf]

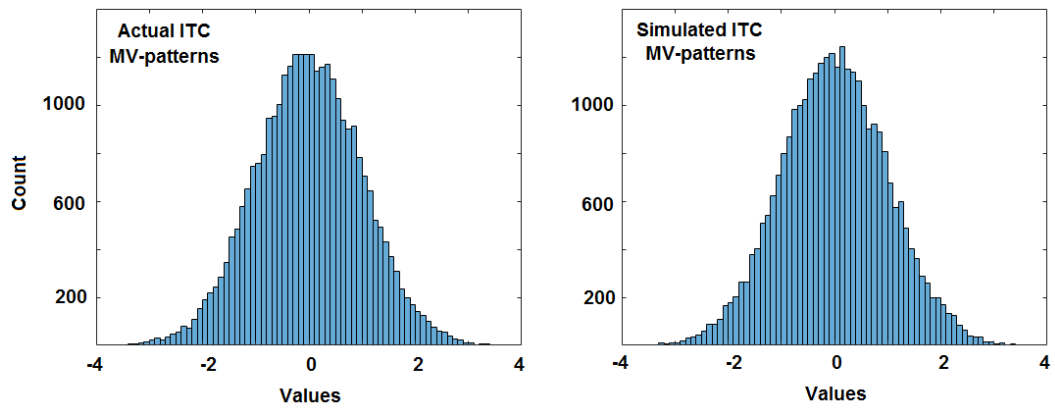

**Fig S2.** Histogram associated with the values of the actual (left panel) and simulated (right panel) MV-patterns of the inferior temporal cortex (ITC) for one subject. As for the Monte Carlo approach, the simulated ITC patterns have been generated as  $Y = (1 - \gamma)TX/\|TX\|_F + \gamma N/\|N\|_F$  where  $X$  denotes the EVC MV-pattern matrix for the subject,  $\gamma$  is a parameter representing the weight of the noise in the model (set as equal to 0.6 in this realisation),  $N$  is random noise and  $T$  is a simulated transformation (whose values follow a standard normal distribution).
