# Supplementary material for: Analysing linear multivariate pattern transformations in neuroimaging data
Source: PubMed Central journal article supplement (PMC6793861; doi:10.1371/journal.pone.0223660), 2019-10-15
Supplement: pone.0223660.s005.pdf [file pone.0223660.s005.pdf]

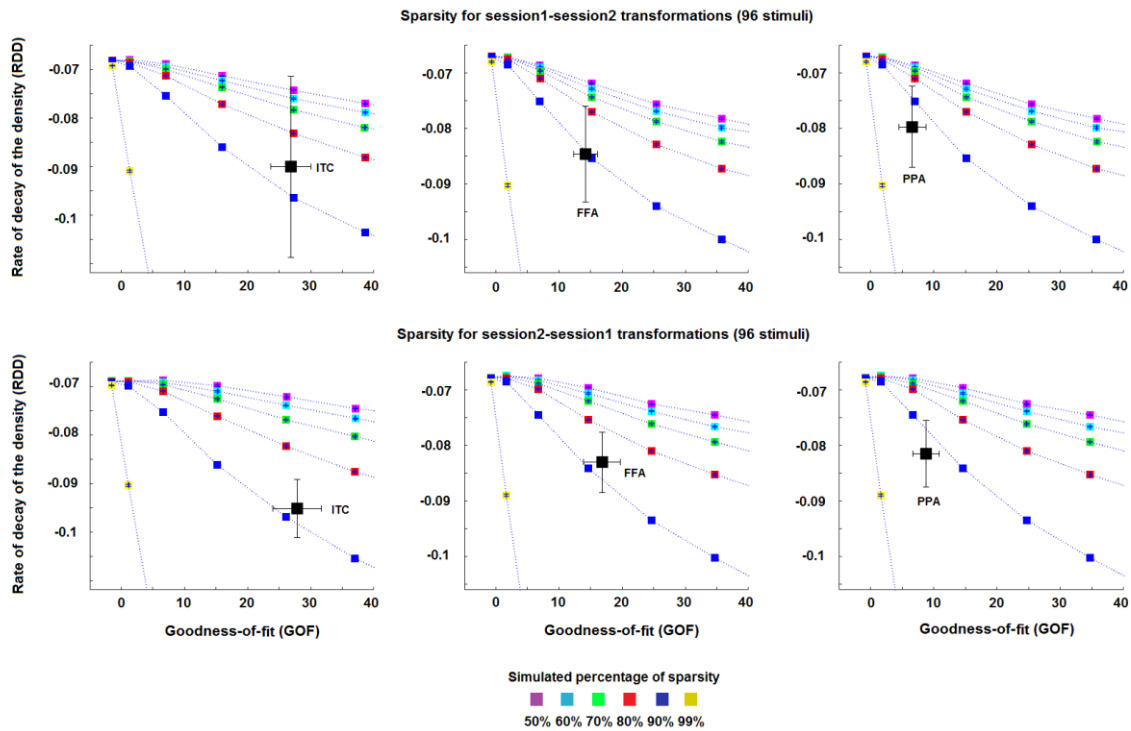

**Fig S5.** Estimated sparsity for the session1-session2 transformations and the session2-session1 transformations with 96 stimuli. The coloured squares (and their error bars) denote the mean (and the standard error of the mean) estimate of *RDD* and *GOF* across the 1000 simulation-realizations for each of the simulated percentages of sparsity, i.e. from 50% to 99%. The black squares (and their error bars) denote the mean (and the standard error of the mean) estimate of *RDD* and *GOF* across the four subjects. The results related to the session1-session2 transformations are in accordance with those obtained for the session2-session1 transformations.
