# Supplementary material for: Analysing linear multivariate pattern transformations in neuroimaging data
Source: PubMed Central journal article supplement (PMC6793861; doi:10.1371/journal.pone.0223660), 2019-10-15
Supplement: pone.0223660.s006.pdf [file pone.0223660.s006.pdf]

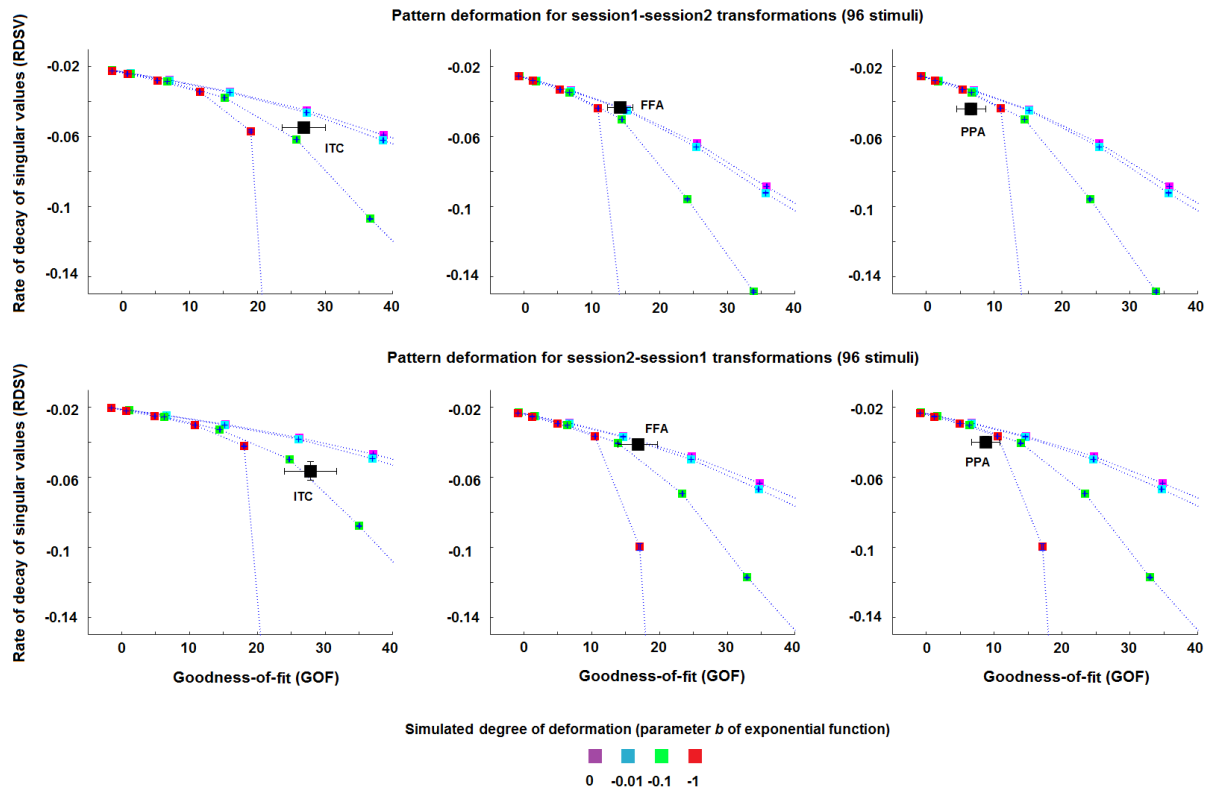

**Fig S6.** Estimated pattern deformation for the session1-session2 transformations and the session2-session1 transformations with 96 stimuli. The coloured squares (and their error bars) denote the mean (and the standard error of the mean) estimate of  $RDSV$  and  $GOF$  across the 1000 simulation-realizations for each of the simulated degree of deformation (parameter  $b$  of an exponential function). The black squares (and their error bars) denote the mean (and the standard error of the mean) estimate of  $RDSV$  and  $GOF$  across the four subjects. The results related to the session1-session2 transformations are in accordance with those obtained for the session2-session1 transformations.
